# Supplementary material for: Functional Genomic Complexity Defines Intratumor Heterogeneity and Tumor Aggressiveness in Liver Cancer
Source: PubMed Central journal article supplement (PMC6858353; doi:10.1038/s41598-019-52578-8), 2019-11-15
Supplement: 41598_2019_52578_MOESM2_ESM.pdf [file 41598_2019_52578_MOESM2_ESM.pdf]

## Supplementary Information for

### *Functional Genomic Complexity Defines Intratumor Heterogeneity and Tumor Aggressiveness in Liver Cancer*

So Mee Kwon<sup>1,2</sup>, Anuradha Budhu<sup>1</sup>, Hyun Goo Woo<sup>1,2,3</sup>, Jittiporn Chaisaingmongkol<sup>1,4,5</sup>, Hien Dang<sup>1</sup>, Marshonna Forgues<sup>1</sup>, Curtis C. Harris<sup>1</sup>, Gao Zhang<sup>6</sup>, Noam Auslander<sup>7</sup>, Eytan Ruppin<sup>7</sup>, Chulabhorn Mahidol<sup>4</sup>, Mathuros Ruchirawat<sup>4,5</sup>, Xin Wei Wang<sup>1, \*</sup>

<sup>1</sup>Laboratory of Human Carcinogenesis and Liver Cancer Program, Center for Cancer Research, National Cancer Institute, Bethesda, Maryland 20892, USA; <sup>2</sup>Department of Physiology, Ajou University School of Medicine, Suwon, 16499, Republic of Korea; <sup>3</sup>Department of Biomedical Science, Graduate School, Ajou University, Suwon, 16499, Republic of Korea; <sup>4</sup>Laboratory of Chemical Carcinogenesis, Chulabhorn Research Institute, Bangkok 10210, Thailand; <sup>5</sup>Center of Excellence on Environmental Health and Toxicology, Office of the Higher Education Commission, Ministry of Education, Bangkok 10400, Thailand; <sup>6</sup>Molecular and Cellular Oncogenesis Program and Melanoma Research Center, The Wistar Institute, Philadelphia, PA 19104, USA; <sup>7</sup>Cancer Data Science Lab, National Cancer Institute, National Institute of health, MD 20892, USA

\*Corresponding author: [xw3u@nih.gov](mailto:xw3u@nih.gov)

#### **This PDF file includes:**

Tables S1 to S14

Table S1a. Table for tFA, CIN, GIN and PCC scores among TIGER\_LC cohort

Table S1b. Table for tFA, CIN, and PCC scores for TCGA HCC cohort

Table S1c. Table for PCC of LCI cohort

Table S2. Overlapped Differentially Expressed Genes among correlated genes between Thai HCC and iCCA

Table S3. Comparison table of overlapped differentially expressed genes among correlated genes.

Table S4. GSEA result compared HFGC with LFGC of Thai iCCA

Table S5. GSEA result compared HFGC with LFGC of Thai HCC

Table S6. GSEA result compared HFGC with LFGC of TCGA HCC

Table S7. Overlapped GSEA result HFGC and LFCG of Thai HCC and Thai iCCA

Table S8. Overlapped recurrent mutation genes between Thai HCC and Thai iCCA

Table S9. Recurrently mutated genes in Thai HCC

Table S10. Recurrently mutated genes in Thai iCCA

Table S11. Information of TP53 mutations mapping.

Table S12. Comparison table of TP53 mutation between HFGC and LFGC among PLC cohorts

Table S13a. Table for tFA of TCGA SKCM cohort

Table S13b. Table for tFA of Hugo Melanoma cohort

**Table S1a. Table for tFA, CIN and GIN and PCC scores among TIGER\_LC cohort.**

| Thai HCC |         |        |            |       |       |      |          |          |
|----------|---------|--------|------------|-------|-------|------|----------|----------|
| SampleID | tFA     | CIN    | GIN        | PCC   | Group | IHC  | ESTIMATE | ABSOLUTE |
| LCS_504A | 640.681 | 16.979 | 403352065  | 0.197 | Low   | 1    | 0.794118 | 0.48     |
| LCS_505A | 778.102 | 52.261 | 1451100755 | 0.380 | High  | 0.9  | 0.915456 | 0.24     |
| LCS_506A | 802.326 | 22.908 | 535560422  | 0.382 | High  | 0.45 | 0.751665 | 0.28     |
| LCS_501A | 825.739 | 31.992 | 811223027  | 0.375 | High  | 0.3  | 0.859835 | 0.41     |
| LCS_502A | 658.129 | 10.109 | 229883293  | 0.342 | High  | 0.4  | 0.446531 | 0.48     |
| LCS_503A | 713.620 | 24.450 | 549670574  | 0.313 | High  | 1    | 0.671346 | 0.93     |
| LCS_557A | 769.821 | 18.055 | 399433899  | 0.192 | Low   | 0.97 | 0.836811 | 0.19     |
| LCS_565A | 598.844 | 11.442 | 148924362  | 0.065 | Low   | 0.35 | 0.86244  | 0.18     |
| LCS_541A | 785.926 | 53.129 | 1356213222 | 0.353 | High  | 0.95 | 0.86325  | 1        |
| LCS_515A | 820.240 | 33.127 | 758569330  | 0.372 | High  | 0.9  | 0.827777 | 0.23     |
| LCS_530A | 918.184 | 41.706 | 1135051952 | 0.487 | High  | 0.95 | 0.974023 | 0.81     |
| LCS_550A | 757.557 | 62.330 | 1758495590 | 0.332 | High  | 1    | 0.956787 | 0.21     |
| LCS_551A | 676.774 | 17.951 | 344898829  | 0.183 | Low   | 0.9  | 0.294253 | 0.2      |
| LCS_564A | 733.027 | 33.328 | 811696396  | 0.403 | High  | 1    | 0.989249 | 0.23     |
| LCS_567A | 735.945 | 20.485 | 534640684  | 0.243 | High  | 0.9  | 0.661839 | 0.19     |
| LCS_507A | 839.909 | 33.276 | 931279816  | 0.494 | High  | 0.85 | 0.856777 | 0.37     |
| LCS_534A | 897.275 | 47.556 | 1241731482 | 0.443 | High  | 0.75 | 0.999017 | 0.29     |
| LCS_542A | 832.472 | 58.284 | 1664585758 | 0.420 | High  | 1    | 0.990641 | 0.2      |
| LCS_517A | 703.686 | 35.660 | 933585686  | 0.296 | High  | 1    | 0.863774 | 0.79     |
| LCS_518A | 624.489 | 19.425 | 450936880  | 0.213 | High  | 0.9  | 0.813822 | 0.27     |
| LCS_536A | 789.915 | 13.971 | 366575577  | 0.297 | High  | 0.3  | 0.509022 | 0.17     |
| LCS_546A | 803.054 | 55.191 | 1537001449 | 0.424 | High  | 0.7  | 0.932417 | 0.27     |
| LCS_528A | 644.484 | 27.393 | 699437363  | 0.255 | High  | 0.95 | 0.470774 | 0.18     |
| LCS_512A | 714.272 | 32.523 | 903640530  | 0.324 | High  | 0.9  | 0.944549 | 0.27     |
| LCS_514A | 669.954 | 24.241 | 657197541  | 0.272 | High  | 1    | 0.991137 | 0.2      |
| LCS_537A | 796.132 | 14.443 | 296708063  | 0.179 | Low   | 0.85 | 0.47806  | 0.19     |
| LCS_524A | 942.299 | 49.457 | 1490817165 | 0.435 | High  | 0.85 | 0.896501 | 0.22     |
| LCS_540A | 840.796 | 60.515 | 1602868607 | 0.430 | High  | 1    | 0.999057 | 0.27     |
| LCS_511A | 724.569 | 13.700 | 266709237  | 0.301 | High  | 0.8  | 0.741866 | 0.2      |
| LCS_543A | 572.680 | 9.152  | 116779742  | 0.092 | Low   | 1    | 0.869176 | 0.2      |
| LCS_547A | 873.516 | 47.273 | 1141172624 | 0.440 | High  | 0.85 | 0.910615 | 0.27     |
| LCS_533A | 620.124 | 43.539 | 1078017235 | 0.135 | Low   | 1    | 0.455957 | NA       |
| LCS_549A | 798.784 | 18.315 | 431256657  | 0.302 | High  | 0.85 | 0.910526 | 0.24     |
| LCS_510A | 664.320 | 25.297 | 549797295  | 0.356 | High  | 1    | 0.999427 | 0.24     |
| LCS_519A | 772.474 | 29.342 | 746753261  | 0.450 | High  | 1    | 0.930828 | 0.37     |
| LCS_529A | 646.271 | 15.923 | 352397399  | 0.338 | High  | 1    | 0.992679 | 0.44     |
| LCS_568A | 776.757 | 46.241 | 1113366161 | 0.371 | High  | 0.75 | 0.984963 | 0.19     |
| LCS_508A | 895.199 | 91.113 | 2545608919 | 0.453 | High  | 0.9  | 0.999783 | 0.25     |
| LCS_513A | 716.319 | 28.509 | 775289522  | 0.193 | Low   | 0.5  | 0.888318 | 0.25     |
| LCS_523A | 645.455 | 23.448 | 537544633  | 0.296 | High  | 0.5  | 0.979801 | 0.16     |

|                  |            |            |            |            |              |            |                 |                 |
|------------------|------------|------------|------------|------------|--------------|------------|-----------------|-----------------|
| LCS_552A         | 849.871    | 42.182     | 1243360705 | 0.412      | High         | 0.8        | 0.732968        | 0.28            |
| LCS_558A         | 670.991    | 15.813     | 313996006  | 0.155      | Low          | 1          | 0.946235        | 0.22            |
| LCS_538A         | 574.235    | 14.355     | 248098140  | 0.071      | Low          | 1          | 0.974766        | 0.18            |
| LCS_539A         | 628.682    | 21.140     | 481469591  | 0.320      | High         | 1          | 0.986288        | 0.31            |
| LCS_559A         | 738.192    | 21.879     | 452435749  | 0.377      | High         | 0.98       | 0.874402        | 0.22            |
| LCS_516A         | 696.648    | 31.652     | 702750256  | 0.277      | High         | 1          | 0.993988        | 0.18            |
| LCS_520A         | 769.062    | 37.655     | 1367333803 | 0.340      | High         | 1          | 0.896512        | 1               |
| LCS_531A         | 735.662    | 62.277     | 1567398907 | 0.353      | High         | 0.5        | 0.997542        | 0.22            |
| LCS_553A         | 732.752    | 38.133     | 993437434  | 0.300      | High         | 1          | 0.958233        | 0.21            |
| LCS_527A         | 700.571    | 16.713     | 364576441  | 0.310      | High         | 0.95       | 0.69855         | 0.25            |
| LCS_545A         | 788.601    | 28.515     | 699036404  | 0.386      | High         | 0.98       | 0.949972        | 0.26            |
| LCS_532A         | 780.401    | 59.329     | 1436002560 | 0.411      | High         | 1          | 0.992218        | 0.23            |
| LCS_562A         | 748.455    | 28.754     | 653973273  | 0.314      | High         | 0.9        | 0.600955        | 0.24            |
| LCS_566A         | 618.078    | 4.784      | 73026335   | 0.316      | High         | 0.85       | 0.347356        | 0.18            |
| LCS_584A         | 882.992    | 43.545     | 1180203796 | 0.427      | High         | 0.9        | 0.990952        | 0.28            |
| LCS_548A         | 633.274    | 13.631     | 313739762  | 0.167      | Low          | 1          | 0.426673        | 0.19            |
| LCS_544A         | 839.814    | 75.377     | 2057271225 | 0.409      | High         | 1          | 0.990868        | 0.33            |
| LCS_560A         | 639.351    | 9.042      | 203191464  | 0.087      | Low          | 0.9        | 0.392243        | 0.17            |
| LCS_563A         | 829.761    | 31.478     | 825245468  | 0.410      | High         | 0.98       | 0.965275        | 0.71            |
| LCS_509A         | 711.933    | 3.624      | 66725496   | -0.107     | Low          | 0.9        | 0.595722        | 0.23            |
| LCS_535A         | 668.365    | 13.556     | 415535629  | 0.009      | Low          | 0.3        | 0.153153        | 0.19            |
| LCS_525A         | 687.470    | 26.698     | 615907314  | 0.241      | High         | 1          | 0.94833         | 0.22            |
| <b>Thai iCCA</b> |            |            |            |            |              |            |                 |                 |
| <b>SampleID</b>  | <b>tFA</b> | <b>CIN</b> | <b>GIN</b> | <b>PCC</b> | <b>Group</b> | <b>IHC</b> | <b>ESTIMATE</b> | <b>ABSOLUTE</b> |
| LCS_597A         | 678.519    | 11.454     | 207581893  | 0.220      | High         | 0.3        | 0.471148        | 0.17            |
| LCS_623A         | 773.185    | 32.819     | 728917626  | 0.342      | High         | 0.9        | 0.577374        | 0.21            |
| LCS_639A         | 609.062    | 22.902     | 751880436  | 0.092      | Low          | 0.6        | 0.520354        | NA              |
| LCS_657A         | 713.145    | 58.278     | 1549290066 | 0.295      | High         | 0.75       | 0.791191        | 0.22            |
| LCS_658A         | 703.025    | 54.643     | 1672422572 | 0.309      | High         | 0.8        | 0.986366        | 0.25            |
| LCS_580A         | 696.278    | 35.215     | 914233942  | 0.262      | High         | 0.6        | 0.707433        | 0.21            |
| LCS_600A         | 684.673    | 33.155     | 942935434  | 0.265      | High         | 0.2        | 0.666849        | 0.2             |
| LCS_616A         | 667.434    | 37.352     | 1116986930 | 0.314      | High         | 0.8        | 0.983009        | 0.2             |
| LCS_637A         | 605.441    | 5.480      | 56828896   | 0.089      | Low          | 0.4        | 0.572446        | 0.41            |
| LCS_650A         | 587.171    | 2.256      | 46431713   | 0.102      | Low          | 0.7        | 0.349039        | 0.2             |
| LCS_651A         | 630.054    | 46.268     | 1211621507 | 0.225      | High         | 0.8        | 0.287086        | 0.24            |
| LCS_586A         | 647.809    | 34.884     | 1088688021 | 0.273      | High         | 0.8        | 0.854036        | 0.34            |
| LCS_587A         | 761.435    | 58.814     | 1589823122 | 0.336      | High         | 0.6        | 0.948613        | 0.42            |
| LCS_595A         | 773.857    | 46.443     | 1340567279 | 0.470      | High         | 0.75       | 0.944374        | 0.24            |
| LCS_645A         | 697.373    | 56.373     | 1545821617 | 0.348      | High         | 0.9        | 0.89388         | 0.21            |
| LCS_570A         | 628.549    | 54.049     | 1446895584 | 0.153      | Low          | 0.85       | 0.471128        | NA              |
| LCS_592A         | 757.727    | 24.828     | 623836669  | 0.288      | High         | 0.36       | 0.315534        | 0.22            |
| LCS_603A         | 776.387    | 49.256     | 1542412037 | 0.319      | High         | 1          | 0.98112         | NA              |
| LCS_684A         | 626.820    | 20.176     | 488344233  | 0.150      | Low          | 0.6        | 0.568633        | 0.18            |
| LCS_643A         | 577.480    | 6.113      | 137429367  | 0.065      | Low          | 0.4        | 0.020751        | 0.23            |

|          |         |        |            |        |      |      |          |      |
|----------|---------|--------|------------|--------|------|------|----------|------|
| LCS_601A | 580.850 | 6.497  | 109161290  | 0.086  | Low  | 0.4  | 0.052547 | 0.2  |
| LCS_612A | 635.219 | 29.895 | 744391961  | 0.282  | High | 0.7  | 0.606239 | 0.19 |
| LCS_653A | 615.784 | 30.508 | 962264877  | 0.148  | Low  | 0.1  | 0.267743 | 0.17 |
| LCS_578A | 659.671 | 38.443 | 992595901  | 0.294  | High | 0.5  | 0.483882 | 0.23 |
| LCS_618A | 649.149 | 26.224 | 600305945  | 0.251  | High | 0.3  | 0.603252 | 0.23 |
| LCS_573A | 769.858 | 30.096 | 829564824  | -0.002 | Low  | 0.3  | 0.826921 | 0.21 |
| LCS_681A | 682.591 | 41.728 | 1100954844 | 0.298  | High | 0.65 | 0.834593 | 0.24 |
| LCS_575A | 590.652 | 13.258 | 228833363  | 0.196  | Low  | 0.9  | 0.963525 | 0.24 |
| LCS_583A | 687.135 | 53.495 | 1495049221 | 0.295  | High | 0.8  | 0.903164 | 0.25 |
| LCS_614A | 495.974 | 10.878 | 281157656  | 0.053  | Low  | 0.6  | 0.579085 | 0.2  |
| LCS_634A | 674.090 | 15.298 | 409466797  | 0.240  | High | 0.6  | 0.428643 | 0.18 |
| LCS_664A | 732.907 | 47.914 | 1409675866 | 0.314  | High | 0.5  | 0.931449 | 0.28 |
| LCS_596A | 705.811 | 67.105 | 1823564599 | 0.303  | High | 1    | 0.926517 | 0.43 |
| LCS_598A | 722.202 | 52.126 | 1417752222 | 0.362  | High | 0.9  | 0.998949 | 0.24 |
| LCS_644A | 703.386 | 44.953 | 1103603216 | 0.340  | High | 0.8  | 0.879404 | 0.21 |
| LCS_646A | 784.935 | 54.046 | 1530370900 | 0.336  | High | 0.66 | 0.782799 | 0.2  |
| LCS_674A | 594.768 | 44.826 | 1064451077 | 0.188  | Low  | 0.7  | 0.626914 | 0.28 |
| LCS_581A | 718.540 | 19.636 | 385201627  | 0.154  | Low  | 0.35 | 0.749788 | 0.16 |
| LCS_626A | 751.591 | 50.648 | 1327498421 | 0.335  | High | 0.7  | 0.575841 | 0.28 |
| LCS_668A | 566.749 | 17.829 | 407810843  | 0.111  | Low  | 0.7  | 0.4864   | 0.25 |
| LCS_585A | 601.376 | 3.536  | 55822698   | 0.091  | Low  | 0.2  | 0.295896 | 0.19 |
| LCS_602A | 631.518 | 16.423 | 379376446  | 0.081  | Low  | 0.15 | 0.177136 | 0.17 |
| LCS_606A | 518.923 | 11.716 | 325891482  | 0.019  | Low  | 0.95 | 0.93018  | 0.17 |
| LCS_621A | 649.324 | 19.102 | 434878013  | 0.124  | Low  | 0.45 | 0.487482 | 0.19 |
| LCS_615A | 653.261 | 30.296 | 697463598  | 0.246  | High | 1    | 0.5153   | 0.25 |
| LCS_631A | 629.553 | 49.979 | 1333334600 | 0.257  | High | 0.74 | 0.774045 | 0.22 |
| LCS_675A | 638.788 | 13.624 | 264312428  | 0.166  | Low  | 0.2  | 0.55685  | 0.18 |
| LCS_683A | 594.087 | 19.823 | 604693582  | 0.164  | Low  | 0.5  | 0.560874 | 0.23 |
| LCS_687A | 799.126 | 35.146 | 1015587242 | 0.297  | High | 0.78 | 0.898884 | 0.2  |
| LCS_636A | 577.275 | 11.827 | 438127775  | 0.128  | Low  | 0.2  | 0.582407 | 0.19 |
| LCS_574A | 728.821 | 43.278 | 1198571020 | 0.394  | High | 0.85 | 0.947743 | 0.24 |
| LCS_624A | 666.230 | 3.808  | 89675379   | 0.149  | Low  | 0.8  | 0.366859 | 0.17 |
| LCS_688A | 684.929 | 31.601 | 823879909  | 0.255  | High | 0.6  | 0.743568 | 0.18 |
| LCS_608A | 775.442 | 98.621 | 2712928645 | 0.390  | High | 1    | 0.997976 | 0.76 |
| LCS_610A | 707.752 | 47.889 | 1269993472 | 0.336  | High | 0.9  | 0.998666 | 0.18 |
| LCS_625A | 715.527 | 51.786 | 1464373282 | 0.285  | High | 0.85 | 0.877041 | 0.22 |
| LCS_590A | 658.820 | 32.303 | 716888550  | 0.309  | High | 0.96 | 0.980892 | 0.22 |
| LCS_638A | 704.271 | 31.870 | 796184399  | 0.315  | High | 0.8  | 0.949938 | 0.48 |
| LCS_642A | 594.571 | 10.872 | 161118644  | 0.045  | Low  | 0.5  | 0.569433 | 0.22 |
| LCS_670A | 522.376 | 17.844 | 536832767  | 0.013  | Low  | 0.1  | 0.244029 | 0.17 |
| LCS_572A | 657.343 | 51.279 | 1299208549 | 0.330  | High | 0.7  | 0.664094 | 0.21 |
| LCS_577A | 688.471 | 30.125 | 619840636  | 0.172  | Low  | 0.3  | 0.908091 | 0.25 |
| LCS_671A | 685.355 | 16.495 | 343322234  | 0.234  | High | 0.8  | 0.463769 | 0.16 |
| LCS_571A | 686.204 | 38.836 | 1159268010 | 0.233  | High | 0.7  | 0.992153 | 0.28 |
| LCS_599A | 640.682 | 23.899 | 615559995  | 0.260  | High | 0.5  | 0.976876 | 0.19 |

|          |         |        |            |       |      |      |          |      |
|----------|---------|--------|------------|-------|------|------|----------|------|
| LCS_604A | 707.234 | 19.668 | 560808338  | 0.237 | High | 1    | 0.856809 | 0.16 |
| LCS_613A | 548.419 | 4.191  | 88028559   | 0.077 | Low  | 0.1  | NA       | 0.19 |
| LCS_667A | 630.378 | 3.064  | 61966037   | 0.007 | Low  | 0.3  | 0.964846 | 0.18 |
| LCS_678A | 564.741 | 11.787 | 224174294  | 0.045 | Low  | 0.25 | NA       | 0.17 |
| LCS_635A | 634.352 | 17.341 | 385399633  | 0.192 | Low  | 0.95 | 0.4821   | 0.19 |
| LCS_641A | 593.070 | 7.808  | 96131018   | 0.063 | Low  | 0.35 | 0.378206 | 0.2  |
| LCS_677A | 778.054 | 31.913 | 853621266  | 0.382 | High | 0.55 | 0.903748 | 0.21 |
| LCS_579A | 589.743 | 16.307 | 341832625  | 0.129 | Low  | 0.85 | 0.309957 | 0.17 |
| LCS_620A | 712.323 | 55.379 | 1723498332 | 0.286 | High | 0.5  | 0.968865 | 0.2  |
| LCS_628A | 751.489 | 7.155  | 215624381  | 0.198 | Low  | 0.4  | 0.661882 | 0.16 |
| LCS_630A | 759.285 | 30.049 | 818562120  | 0.225 | High | 0.5  | 0.151957 | 0.27 |
| LCS_680A | 787.884 | 63.929 | 1691733143 | 0.195 | Low  | 0.75 | 0.60259  | NA   |
| LCS_633A | 611.311 | 12.287 | 170765978  | 0.150 | Low  | 0.45 | 0.26487  | 0.16 |
| LCS_640A | 732.058 | 28.958 | 754347362  | 0.269 | High | 1    | 0.774163 | 0.2  |
| LCS_649A | 725.227 | 30.076 | 848795702  | 0.323 | High | 0.5  | 0.681162 | 0.19 |
| LCS_685A | 596.239 | 22.752 | 578102989  | 0.202 | High | 0.8  | 0.786366 | 0.21 |
| LCS_594A | 668.579 | 34.094 | 931371596  | 0.288 | High | 0.4  | 0.89562  | 0.21 |
| LCS_627A | 643.123 | 30.926 | 729128138  | 0.283 | High | 0.8  | 0.936532 | 0.18 |
| LCS_648A | 638.022 | 24.899 | 634005244  | 0.209 | High | 0.65 | 0.9869   | 0.22 |
| LCS_654A | 563.573 | 20.772 | 462634683  | 0.006 | Low  | 0.35 | 0.426095 | 0.18 |
| LCS_679A | 681.193 | 20.499 | 592245521  | 0.231 | High | 0.57 | 0.362788 | 0.2  |
| LCS_609A | 646.746 | 26.012 | 649514826  | 0.172 | Low  | 0.85 | 0.599898 | 0.19 |
| LCS_652A | 731.838 | 51.120 | 1344823155 | 0.288 | High | 0.9  | 0.953952 | 0.24 |
| LCS_669A | 647.614 | 20.800 | 506482564  | 0.158 | Low  | 0.4  | 0.949991 | 0.19 |
| LCS_682A | 695.584 | 34.073 | 981227061  | 0.304 | High | 0.6  | 0.991582 | 0.28 |

**Table S1b. Table for tFA, CIN and PCC for TCGA HCC cohort**

| SampleID                      | tFA     | CIN    | PCC   | Group | IHC  | ESTIM<br>ATE  | ABSOU<br>LTE |
|-------------------------------|---------|--------|-------|-------|------|---------------|--------------|
| TCGA-DD-AACO-01A-11R-A41C-07  | 260.416 | 31.593 | 0.188 | Low   | 0.8  | 0.84868       | 0.2          |
| TCGA-CC-5263-01A-01R-A131-07  | 231.347 | 32.143 | 0.278 | High  | 0.8  | 0.88271<br>85 | 0.69         |
| TCGA-CC-5261-01A-01R-A131-07  | 270.961 | 45.330 | 0.314 | High  | 0.77 | 0.77690<br>84 | 0.29         |
| TCGA-CC-A5UC-01A-11R-A28V-07  | 236.177 | 22.802 | 0.231 | High  | 0.75 | 0.87178<br>24 | 0.25         |
| TCGA-RC-A6M5-01A-11R-A32O-07  | 233.243 | 1.648  | 0.153 | Low   | 0.69 | 0.82036<br>88 | 0.27         |
| TCGA-DD-A1EH-01A-11R-A131-07  | 287.457 | 23.901 | 0.314 | High  | 0.85 | 0.90614<br>54 | 0.46         |
| TCGA-ED-A8O5-01A-11R-A36F-07  | 314.650 | 25.824 | 0.347 | High  | 1    | 0.92752<br>28 | 0.83         |
| TCGA-CC-5264-01A-01R-A131-07  | 266.629 | 69.780 | 0.335 | High  | 0.9  | 0.92467<br>58 | 0.56         |
| TCGA-DD-AACS-01A-11R-A41C-07  | 273.232 | 41.484 | 0.322 | High  | 0.9  | 0.95295<br>32 | 0.88         |
| TCGA-G3-A5SL-01A-11R-A27V-07  | 275.664 | 17.582 | 0.330 | High  | 0.9  | 0.91180<br>05 | 0.35         |
| TCGA-DD-AAACE-01A-11R-A41C-07 | 291.702 | 56.044 | 0.327 | High  | 0.93 | 0.91103<br>46 | 0.26         |
| TCGA-BC-4072-01B-11R-A155-07  | 235.645 | 27.198 | 0.235 | High  | 0.95 | 0.79309<br>74 | 0.44         |
| TCGA-CC-A7II-01A-11R-A33J-07  | 298.547 | 44.780 | 0.259 | High  | 1    | 0.94412<br>55 | 0.26         |
| TCGA-DD-AAEK-01A-11R-A41C-07  | 256.899 | 37.363 | 0.322 | High  | 1    | 0.75940<br>22 | 0.25         |
| TCGA-DD-AAACB-01A-11R-A41C-07 | 267.812 | 48.901 | 0.281 | High  | 0.85 | 0.81915<br>16 | 0.2          |
| TCGA-EP-A3JL-01A-11R-A213-07  | 257.045 | 13.462 | 0.273 | High  | 0.85 | 0.76940<br>98 | 0.2          |
| TCGA-EP-A2KB-01A-11R-A180-07  | 304.423 | 56.319 | 0.303 | High  | 0.97 | 0.93948<br>6  | 0.22         |
| TCGA-ED-A4XI-01A-11R-A266-07  | 226.076 | 5.769  | 0.117 | Low   | 0.8  | 0.76781<br>72 | 0.3          |
| TCGA-G3-A7M7-01A-12R-A352-07  | 246.379 | 3.297  | 0.175 | Low   | 0.7  | 0.92534<br>45 | 0.54         |
| TCGA-CC-A7IG-01A-11R-A33J-07  | 262.417 | 55.769 | 0.267 | High  | 1    | 0.90281<br>67 | 0.26         |
| TCGA-DD-AACT-01A-11R-A41C-07  | 289.843 | 28.022 | 0.331 | High  | 1    | 0.83009<br>36 | 0.21         |
| TCGA-UB-A7MF-01A-11R-A33J-07  | 273.117 | 22.802 | 0.237 | High  | 0.85 | 0.77161<br>7  | 0.24         |
| TCGA-HP-A5N0-01A-11R-A28V-07  | 261.943 | 17.582 | 0.341 | High  | 1    | 0.81287<br>98 | 0.45         |
| TCGA-CC-5260-01A-01R-A131-07  | 260.224 | 27.747 | 0.203 | High  | 0.8  | 0.81762<br>56 | 0.47         |
| TCGA-G3-A25X-01A-11R-A16W-07  | 266.378 | 37.912 | 0.279 | High  | 0.65 | 0.76456<br>95 | 1            |
| TCGA-DD-AAE9-01A-11R-A41C-07  | 264.033 | 34.615 | 0.270 | High  | 0.97 | 0.94859<br>52 | 0.29         |
| TCGA-RC-A7SF-01A-11R-A352-07  | 236.807 | 18.681 | 0.330 | High  | 0.87 | 0.91346<br>68 | 0.58         |
| TCGA-NI-A8LF-01A-11R-A36F-07  | 262.422 | 47.253 | 0.345 | High  | 0.9  | 0.88978<br>08 | 0.19         |
| TCGA-2Y-A9H6-01A-11R-         | 267.611 | 21.429 | 0.280 | High  | 0.8  | 0.78893       | 0.49         |

|                              |         |        |       |      |      |           |      |
|------------------------------|---------|--------|-------|------|------|-----------|------|
| A39D-07                      |         |        |       |      |      | 5         |      |
| TCGA-DD-AAD6-01A-11R-A41C-07 | 272.579 | 27.198 | 0.326 | High | 0.92 | 0.9512281 | 0.87 |
| TCGA-ZP-A9D2-01A-11R-A38B-07 | 256.995 | 31.044 | 0.314 | High | 1    | 0.8894523 | 0.25 |
| TCGA-DD-A4NQ-01A-21R-A28V-07 | 232.242 | 32.143 | 0.304 | High | 0.8  | 0.8960213 | 0.39 |
| TCGA-NI-A4U2-01A-11R-A28V-07 | 253.876 | 16.484 | 0.194 | Low  | 1    | 0.8890737 | 0.67 |
| TCGA-ED-A97K-01A-21R-A38B-07 | 255.413 | 34.066 | 0.224 | High | 0.5  | 0.8580838 | 0.28 |
| TCGA-DD-A4NB-01A-12R-A266-07 | 213.755 | 8.516  | 0.153 | Low  | 0.9  | 0.707266  | 0.29 |
| TCGA-2Y-A9H7-01A-11R-A39D-07 | 255.019 | 15.934 | 0.273 | High | 0.85 | 0.9293143 | 0.79 |
| TCGA-CC-A3MC-01A-11R-A22L-07 | 247.075 | 18.407 | 0.322 | High | 0.75 | 0.8824604 | 0.24 |
| TCGA-BC-A10Q-01A-11R-A131-07 | 268.860 | 70.055 | 0.193 | Low  | 0.97 | 0.9000269 | 0.46 |
| TCGA-MI-A75E-01A-11R-A32O-07 | 224.774 | 13.736 | 0.177 | Low  | 0.73 | 0.8196875 | 0.34 |
| TCGA-WX-AA46-01A-11R-A39D-07 | 253.677 | 6.593  | 0.151 | Low  | 0.85 | 0.8614018 | 0.19 |
| TCGA-FV-A3I1-01A-11R-A22L-07 | 263.288 | 25.824 | 0.287 | High | 1    | 0.8273036 | 0.3  |
| TCGA-DD-A4NJ-01A-11R-A27V-07 | 260.172 | 27.473 | 0.317 | High | 0.5  | 0.8128995 | 0.25 |
| TCGA-DD-AAVY-01A-11R-A41C-07 | 287.682 | 17.857 | 0.283 | High | 0.85 | 0.952509  | 0.64 |
| TCGA-DD-AACK-01A-11R-A41C-07 | 228.015 | 3.022  | 0.122 | Low  | 0.8  | 0.9274937 | 0.57 |
| TCGA-DD-AAE2-01A-11R-A41C-07 | 232.749 | 13.187 | 0.249 | High | 1    | 0.8116323 | 0.38 |
| TCGA-XR-A8TF-01A-11R-A36F-07 | 297.783 | 53.297 | 0.279 | High | 0.8  | 0.9401696 | 0.41 |
| TCGA-KR-A7K8-01A-11R-A33J-07 | 249.926 | 18.681 | 0.252 | High | 1    | 0.7513417 | 1    |
| TCGA-DD-A118-01A-11R-A131-07 | 255.236 | 47.253 | 0.246 | High | 0.95 | 0.8821516 | 0.52 |
| TCGA-BD-A3EP-01A-11R-A22L-07 | 231.000 | 34.341 | 0.278 | High | 1    | 0.7375086 | 0.21 |
| TCGA-KR-A7K2-01A-12R-A33R-07 | 276.767 | 58.791 | 0.267 | High | 1    | 0.8597256 | 0.28 |
| TCGA-ED-A7XO-01A-11R-A352-07 | 305.880 | 20.330 | 0.309 | High | 0.3  | 0.8325818 | 0.18 |
| TCGA-DD-A4NF-01A-11R-A27V-07 | 259.792 | 4.945  | 0.130 | Low  | 0.9  | 0.9381397 | 0.76 |
| TCGA-ZS-A9CG-01A-11R-A37K-07 | 232.120 | 9.890  | 0.214 | High | 0.85 | 0.9095129 | 0.2  |
| TCGA-EP-A3RK-01A-11R-A22L-07 | 241.578 | 18.956 | 0.283 | High | 0.75 | 0.7230537 | 0.32 |
| TCGA-DD-A1EK-01A-11R-A213-07 | 248.430 | 11.538 | 0.244 | High | 0.75 | 0.8377221 | 0.3  |
| TCGA-WJ-A86L-01A-12R-A39D-07 | 255.149 | 20.879 | 0.241 | High | 0.8  | 0.9524147 | 0.44 |
| TCGA-DD-A1ED-01A-11R-A155-07 | 226.657 | 0.275  | 0.016 | Low  | 1    | 0.7923279 | 0.24 |
| TCGA-G3-AAV3-01A-11R-A37K-07 | 236.328 | 9.615  | 0.226 | High | 0.75 | 0.7929168 | 0.44 |
| TCGA-2Y-A9H5-01A-11R-        | 284.378 | 25.824 | 0.311 | High | 0.75 | 0.87138   | 0.23 |



|                              |         |        |        |      |      |           |      |
|------------------------------|---------|--------|--------|------|------|-----------|------|
| A38B-07                      |         |        |        |      |      | 15        |      |
| TCGA-G3-A7M8-01A-11R-A33R-07 | 224.294 | 0.000  | -0.013 | Low  | 0.8  | 0.8696565 | 0.48 |
| TCGA-DD-A4NK-01A-11R-A28V-07 | 282.209 | 20.604 | 0.283  | High | 0.9  | 0.9147014 | 0.21 |
| TCGA-DD-A39X-01A-11R-A213-07 | 256.587 | 12.637 | 0.321  | High | 0.9  | 0.8668455 | 0.2  |
| TCGA-DD-A39Z-01A-11R-A213-07 | 284.736 | 29.670 | 0.233  | High | 1    | 0.9595869 | 0.61 |
| TCGA-DD-AAD2-01A-11R-A41C-07 | 241.354 | 9.341  | 0.269  | High | 0.42 | 0.7697482 | 0.35 |
| TCGA-DD-AAE7-01A-11R-A41C-07 | 213.623 | 5.220  | 0.173  | Low  | 1    | 0.8294046 | 0.6  |
| TCGA-BC-A216-01A-11R-A155-07 | 255.448 | 23.352 | 0.263  | High | 0.94 | 0.8823803 | 0.36 |
| TCGA-DD-A11A-01A-11R-A131-07 | 261.165 | 57.967 | 0.334  | High | 0.85 | 0.9419613 | 0.2  |
| TCGA-CC-A8HV-01A-11R-A36F-07 | 301.973 | 69.505 | 0.337  | High | 1    | 0.9560854 | 0.24 |
| TCGA-G3-AAV4-01A-11R-A38B-07 | 305.411 | 31.868 | 0.247  | High | 1    | 0.9266231 | 0.21 |
| TCGA-DD-A4NP-01A-11R-A28V-07 | 255.375 | 7.143  | 0.140  | Low  | 1    | 0.9033545 | 0.48 |
| TCGA-ED-A459-01A-11R-A266-07 | 270.033 | 39.286 | 0.357  | High | 1    | 0.887356  | 0.22 |
| TCGA-DD-AADV-01A-11R-A39D-07 | 287.640 | 31.319 | 0.300  | High | 1    | 0.885392  | 0.21 |
| TCGA-DD-AADF-01A-11R-A41C-07 | 295.856 | 45.604 | 0.253  | High | 0.8  | 0.9231742 | 0.35 |
| TCGA-2Y-A9H8-01A-11R-A39D-07 | 275.156 | 55.769 | 0.298  | High | 0.65 | 0.8682814 | 0.43 |
| TCGA-DD-A113-01A-11R-A131-07 | 240.990 | 64.286 | 0.314  | High | 0.98 | 0.8858781 | 0.2  |
| TCGA-G3-AAV7-01A-11R-A38B-07 | 264.372 | 48.626 | 0.318  | High | 0.88 | 0.8600343 | 0.32 |
| TCGA-CC-A8HT-01A-11R-A36F-07 | 246.263 | 25.000 | 0.275  | High | 1    | 0.896248  | 0.32 |
| TCGA-G3-A3CK-01A-11R-A213-07 | 255.166 | 10.989 | 0.180  | Low  | 1    | 0.8725092 | 0.23 |
| TCGA-DD-A73D-01A-12R-A32O-07 | 286.004 | 35.440 | 0.301  | High | 0.98 | 0.9747933 | 0.26 |
| TCGA-RC-A7SK-01A-11R-A352-07 | 281.033 | 26.374 | 0.292  | High | 1    | 0.9533785 | 0.21 |
| TCGA-DD-AAEB-01A-11R-A41C-07 | 270.490 | 15.110 | 0.147  | Low  | 1    | 0.9035715 | 0.91 |
| TCGA-ZS-A9CD-01A-11R-A37K-07 | 245.998 | 10.989 | 0.213  | High | 0.8  | 0.8452839 | 0.22 |
| TCGA-DD-A4NN-01A-11R-A28V-07 | 301.580 | 39.011 | 0.347  | High | 1    | 0.9415511 | 0.65 |
| TCGA-T1-A6J8-01A-11R-A32O-07 | 246.107 | 23.901 | 0.330  | High | 1    | 0.8912187 | 0.26 |
| TCGA-FV-A4ZP-01A-12R-A266-07 | 269.774 | 50.549 | 0.226  | High | 0.8  | 0.833488  | 0.21 |
| TCGA-DD-AADM-01A-11R-A41C-07 | 258.412 | 31.593 | 0.285  | High | 0.85 | 0.8821861 | 0.43 |
| TCGA-BC-A10Z-01A-11R-A131-07 | 276.224 | 25.549 | 0.238  | High | 0.9  | 0.9771814 | 0.41 |
| TCGA-BW-A5NO-01A-11R-A27V-07 | 282.413 | 54.396 | 0.321  | High | 1    | 0.8893121 | 0.22 |
| TCGA-DD-AADA-01A-11R-        | 279.322 | 26.648 | 0.289  | High | 0.8  | 0.81477   | 0.69 |

|                               |         |        |       |      |      |               |      |
|-------------------------------|---------|--------|-------|------|------|---------------|------|
| A41C-07                       |         |        |       |      |      | 77            |      |
| TCGA-DD-A3A4-01A-11R-A22L-07  | 272.748 | 7.692  | 0.120 | Low  | 1    | 0.94309<br>23 | 0.51 |
| TCGA-DD-AAW2-01A-11R-A41C-07  | 280.589 | 23.901 | 0.318 | High | 0.85 | 0.93089<br>34 | 0.19 |
| TCGA-DD-AAC8-01A-11R-A41C-07  | 278.117 | 45.330 | 0.291 | High | 0.8  | 0.90386<br>69 | 0.57 |
| TCGA-DD-A119-01A-11R-A131-07  | 261.286 | 29.945 | 0.294 | High | 0.9  | 0.87695<br>98 | 0.29 |
| TCGA-DD-A3A3-01A-11R-A22L-07  | 287.410 | 19.231 | 0.247 | High | 1    | 0.94008       | 0.2  |
| TCGA-DD-AACQ-01A-11R-A41C-07  | 260.112 | 19.505 | 0.279 | High | 1    | 0.97014<br>22 | 0.89 |
| TCGA-BC-A110-01A-11R-A131-07  | 238.159 | 0.000  | 0.021 | Low  | 0.55 | 0.67043<br>94 | 0.59 |
| TCGA-DD-AACU-01A-11R-A41C-07  | 262.727 | 77.473 | 0.334 | High | 1    | 0.89201<br>76 | 0.24 |
| TCGA-PD-A5DF-01A-11R-A27V-07  | 218.277 | 18.407 | 0.264 | High | 1    | 0.78544<br>98 | 0.32 |
| TCGA-DD-A3A8-01A-11R-A22L-07  | 267.811 | 13.187 | 0.237 | High | 0.9  | 0.94297<br>22 | 0.38 |
| TCGA-K7-A6G5-01A-11R-A311-07  | 253.425 | 7.967  | 0.195 | Low  | 1    | 0.83918<br>36 | 0.59 |
| TCGA-LG-A9QD-01A-11R-A38B-07  | 246.293 | 9.890  | 0.200 | Low  | 0.96 | 0.89014<br>23 | 0.3  |
| TCGA-EP-A2KC-01A-11R-A213-07  | 267.252 | 39.011 | 0.330 | High | 1    | 0.91269<br>7  | 0.23 |
| TCGA-DD-AAADD-01A-11R-A41C-07 | 294.868 | 41.209 | 0.267 | High | 0.9  | 0.95746<br>51 | 0.43 |
| TCGA-FV-A4ZQ-01A-11R-A266-07  | 244.964 | 26.374 | 0.248 | High | 0.75 | 0.80832<br>15 | 0.16 |
| TCGA-BC-A5W4-01A-11R-A28V-07  | 278.064 | 79.670 | 0.308 | High | 0.9  | 0.97482<br>84 | 0.38 |
| TCGA-ED-A82E-01A-11R-A352-07  | 266.591 | 62.637 | 0.215 | High | 0.4  | 0.87454<br>27 | 0.24 |
| TCGA-BC-A10U-01A-11R-A131-07  | 264.661 | 28.022 | 0.332 | High | 0.96 | 0.94331<br>86 | 0.8  |
| TCGA-BD-A3ER-01A-11R-A213-07  | 234.864 | 7.692  | 0.180 | Low  | 1    | 0.81354<br>02 | 0.18 |
| TCGA-DD-AAVV-01A-11R-A41C-07  | 249.730 | 35.440 | 0.335 | High | 0.75 | 0.74623<br>39 | 0.21 |
| TCGA-BC-A3KG-01A-11R-A213-07  | 307.723 | 35.165 | 0.307 | High | 1    | 0.95004<br>71 | 0.22 |
| TCGA-FV-A2QR-01A-11R-A213-07  | 235.086 | 26.099 | 0.293 | High | 0.7  | 0.86784<br>49 | 0.79 |
| TCGA-DD-AAC9-01A-11R-A41C-07  | 247.083 | 9.615  | 0.197 | Low  | 0.8  | 0.77435<br>96 | 0.42 |
| TCGA-DD-A4NI-01A-11R-A27V-07  | 251.822 | 17.857 | 0.264 | High | 0.95 | 0.80047<br>6  | 0.17 |
| TCGA-5C-AAPD-01A-21R-A39D-07  | 297.216 | 46.703 | 0.317 | High | 0.53 | 0.75875<br>71 | 0.28 |
| TCGA-MI-A75I-01A-11R-A32O-07  | 282.767 | 27.747 | 0.359 | High | 0.89 | 0.93422<br>02 | 0.57 |
| TCGA-FV-A3R2-01A-11R-A22L-07  | 284.317 | 37.912 | 0.376 | High | 1    | 0.92558<br>92 | 0.77 |
| TCGA-DD-A1EL-01A-11R-A155-07  | 256.835 | 41.758 | 0.312 | High | 0.9  | 0.93918<br>24 | 0.19 |
| TCGA-DD-A1EA-01A-11R-A131-07  | 255.273 | 15.385 | 0.220 | High | 1    | 0.87922<br>71 | 0.28 |
| TCGA-DD-A73B-01A-12R-         | 285.105 | 67.033 | 0.342 | High | 0.96 | 0.95000       | 0.5  |

|                              |         |        |       |      |      |           |      |
|------------------------------|---------|--------|-------|------|------|-----------|------|
| A32O-07                      |         |        |       |      |      | 4         |      |
| TCGA-G3-A25S-01A-11R-A16W-07 | 271.510 | 53.297 | 0.360 | High | 1    | 0.8985935 | 0.2  |
| TCGA-UB-AA0U-01A-11R-A38B-07 | 256.133 | 35.165 | 0.332 | High | 1    | 0.8057393 | 0.33 |
| TCGA-FV-A310-01A-11R-A22L-07 | 274.356 | 32.692 | 0.249 | High | 1    | 0.8768731 | 0.23 |
| TCGA-FV-A23B-01A-11R-A16W-07 | 290.434 | 26.099 | 0.315 | High | 0.9  | 0.8799833 | 0.74 |
| TCGA-2V-A95S-01A-11R-A37K-07 | 272.212 | 19.780 | 0.208 | High | 0.5  | 0.7218246 | 0.51 |
| TCGA-DD-AADL-01A-11R-A41C-07 | 291.173 | 38.462 | 0.351 | High | 0.9  | 0.9565283 | 0.21 |
| TCGA-CC-5258-01A-01R-A131-07 | 262.818 | 28.571 | 0.295 | High | 0.9  | 0.8662359 | 0.22 |
| TCGA-EP-A12J-01A-11R-A131-07 | 275.494 | 12.912 | 0.238 | High | 0.93 | 0.9194492 | 0.79 |
| TCGA-5R-AA1C-01A-11R-A41C-07 | 272.862 | 30.220 | 0.267 | High | 0.94 | 0.9049292 | 0.26 |
| TCGA-DD-A3A6-01A-11R-A22L-07 | 262.330 | 0.000  | 0.017 | Low  | 1    | 0.6903289 | 0.2  |
| TCGA-DD-AAAD-01A-11R-A41C-07 | 259.797 | 40.110 | 0.367 | High | 0.75 | 0.9445051 | 0.2  |
| TCGA-DD-A3A1-01A-11R-A213-07 | 247.331 | 27.473 | 0.284 | High | 1    | 0.8897118 | 0.71 |
| TCGA-DD-AACA-01A-11R-A41C-07 | 279.834 | 22.802 | 0.231 | High | 0.8  | 0.9403974 | 0.85 |
| TCGA-DD-A4NA-01A-11R-A266-07 | 277.137 | 25.275 | 0.170 | Low  | 1    | 0.8490168 | 0.27 |
| TCGA-MI-A75H-01A-11R-A32O-07 | 249.304 | 10.989 | 0.257 | High | 0.83 | 0.8339857 | 0.61 |
| TCGA-CC-5262-01A-01R-A131-07 | 231.546 | 16.484 | 0.206 | High | 0.8  | 0.7638443 | 0.34 |
| TCGA-DD-AAE3-01A-11R-A41C-07 | 257.778 | 34.341 | 0.253 | High | 1    | 0.8554586 | 0.28 |
| TCGA-2Y-A9H4-01A-11R-A38B-07 | 252.345 | 20.604 | 0.261 | High | 0.85 | 0.8880508 | 0.19 |
| TCGA-DD-A3A7-01A-11R-A22L-07 | 271.264 | 50.000 | 0.267 | High | 1    | 0.9275157 | 0.3  |
| TCGA-DD-AAEH-01A-11R-A41C-07 | 247.020 | 17.033 | 0.288 | High | 1    | 0.7626037 | 0.71 |
| TCGA-FV-A496-01A-11R-A266-07 | 293.555 | 44.231 | 0.306 | High | 0.85 | 0.9655473 | 0.32 |
| TCGA-G3-AAV2-01A-11R-A37K-07 | 278.249 | 16.484 | 0.223 | High | 0.85 | 0.9151682 | 0.38 |
| TCGA-MI-A75G-01A-11R-A32O-07 | 298.360 | 38.462 | 0.269 | High | 0.87 | 0.9488657 | 0.25 |
| TCGA-DD-A1EF-01A-11R-A131-07 | 286.839 | 33.242 | 0.231 | High | 0.85 | 0.8751279 | 0.29 |
| TCGA-GJ-A3OU-01A-31R-A38B-07 | 217.999 | 12.912 | 0.225 | High | 1    | 0.4823377 | 0.25 |
| TCGA-GJ-A9DB-01A-11R-A37K-07 | 230.459 | 8.242  | 0.231 | High | 0.65 | 0.8583934 | 0.32 |
| TCGA-DD-A11D-01A-11R-A131-07 | 254.002 | 18.956 | 0.206 | High | 0.75 | 0.9042465 | 0.38 |
| TCGA-CC-A1HT-01A-11R-A131-07 | 256.159 | 19.231 | 0.229 | High | 0.6  | 0.6681142 | 0.21 |
| TCGA-DD-AADW-01A-11R-A39D-07 | 285.979 | 36.538 | 0.316 | High | 1    | 0.9196176 | 0.25 |
| TCGA-CC-A9FU-01A-11R-        | 301.514 | 63.187 | 0.301 | High | 0.84 | 0.96679   | 0.21 |

|                              |         |        |        |      |      |           |      |
|------------------------------|---------|--------|--------|------|------|-----------|------|
| A37K-07                      |         |        |        |      |      | 99        |      |
| TCGA-ED-A5KG-01A-11R-A27V-07 | 257.727 | 0.275  | 0.185  | Low  | 1    | 0.447413  | 0.36 |
| TCGA-DD-AAEE-01A-11R-A41C-07 | 263.540 | 31.868 | 0.340  | High | 1    | 0.939832  | 0.24 |
| TCGA-WX-AA47-01A-11R-A39D-07 | 257.448 | 13.736 | 0.143  | Low  | 0.95 | 0.9635843 | 0.22 |
| TCGA-BC-A10S-01A-22R-A131-07 | 272.285 | 9.890  | 0.229  | High | 0.9  | 0.7793755 | 0.62 |
| TCGA-G3-A3CJ-01A-11R-A213-07 | 261.481 | 16.484 | 0.198  | Low  | 1    | 0.9106893 | 0.58 |
| TCGA-DD-A39Y-01A-11R-A213-07 | 257.197 | 45.879 | 0.298  | High | 0.9  | 0.9425404 | 0.3  |
| TCGA-FV-A495-01A-11R-A266-07 | 281.040 | 26.099 | 0.161  | Low  | 0.7  | 0.7588298 | 0.49 |
| TCGA-DD-AACP-01A-11R-A41C-07 | 265.545 | 52.473 | 0.276  | High | 0.7  | 0.9728134 | 0.21 |
| TCGA-DD-A4NR-01A-11R-A311-07 | 229.735 | 4.670  | 0.221  | High | 0.7  | 0.6352681 | 0.42 |
| TCGA-DD-AADP-01A-11R-A39D-07 | 241.814 | 26.923 | 0.384  | High | 1    | 0.8866511 | 0.23 |
| TCGA-DD-AAD5-01A-11R-A41C-07 | 249.788 | 52.473 | 0.232  | High | 0.94 | 0.8779055 | 0.21 |
| TCGA-RC-A7SH-01A-11R-A38B-07 | 318.990 | 35.165 | 0.281  | High | 0.65 | 0.955381  | 0.33 |
| TCGA-DD-AAD8-01A-11R-A41C-07 | 282.463 | 76.374 | 0.324  | High | 0.83 | 0.9248925 | 0.24 |
| TCGA-DD-AAVP-01A-11R-A41C-07 | 268.066 | 18.132 | 0.250  | High | 0.8  | 0.9055765 | 0.43 |
| TCGA-DD-AACI-01A-11R-A41C-07 | 274.140 | 36.264 | 0.283  | High | 0.85 | 0.7255949 | 0.25 |
| TCGA-DD-A114-01A-11R-A131-07 | 268.878 | 9.341  | 0.238  | High | 0.75 | 0.6847981 | 0.22 |
| TCGA-2Y-A9GW-01A-11R-A38B-07 | 254.905 | 9.066  | 0.307  | High | 1    | 0.7481811 | 0.2  |
| TCGA-DD-A116-01A-11R-A131-07 | 278.716 | 21.978 | 0.262  | High | 0.9  | 0.8873743 | 0.22 |
| TCGA-DD-AACW-01A-11R-A41C-07 | 283.124 | 23.352 | 0.335  | High | 1    | 0.9320209 | 0.22 |
| TCGA-DD-A39W-01A-11R-A213-07 | 254.580 | 9.890  | 0.137  | Low  | 0.75 | 0.9316022 | 0.18 |
| TCGA-2Y-A9GU-01A-11R-A38B-07 | 259.268 | 32.143 | 0.235  | High | 1    | 0.9361984 | 0.74 |
| TCGA-CC-A9FV-01A-11R-A37K-07 | 307.515 | 0.000  | -0.009 | Low  | 0.94 | 0.523932  | 0.37 |
| TCGA-DD-AAEG-01A-11R-A39D-07 | 260.499 | 22.527 | 0.340  | High | 1    | 0.9393854 | 0.39 |
| TCGA-DD-AAW0-01A-11R-A41C-07 | 254.335 | 29.121 | 0.376  | High | 0.85 | 0.7869982 | 0.48 |
| TCGA-2Y-A9H0-01A-11R-A38B-07 | 255.371 | 22.527 | 0.314  | High | 1    | 0.8947486 | 0.83 |
| TCGA-DD-AACG-01A-11R-A41C-07 | 269.025 | 39.560 | 0.333  | High | 0.85 | 0.9083648 | 0.23 |
| TCGA-RG-A7D4-01A-12R-A33R-07 | 279.351 | 47.253 | 0.333  | High | 0.65 | 0.8439542 | 0.23 |
| TCGA-ZP-A9D0-01A-11R-A37K-07 | 266.361 | 16.484 | 0.281  | High | 0.95 | 0.9233924 | 0.68 |
| TCGA-DD-AAVX-01A-11R-A41C-07 | 243.246 | 10.989 | 0.170  | Low  | 0.75 | 0.8377109 | 0.69 |
| TCGA-2Y-A9GS-01A-12R-        | 257.149 | 27.473 | 0.320  | High | 0.65 | 0.86388   | 0.3  |

|                              |         |        |       |      |      |           |      |
|------------------------------|---------|--------|-------|------|------|-----------|------|
| A38B-07                      |         |        |       |      |      | 68        |      |
| TCGA-XR-A8TG-01A-11R-A36F-07 | 250.933 | 21.703 | 0.266 | High | 0.7  | 0.8813241 | 0.26 |
| TCGA-ZP-A9CZ-01A-11R-A38B-07 | 225.622 | 22.253 | 0.290 | High | 0.8  | 0.8077429 | 0.66 |
| TCGA-DD-A1EC-01A-21R-A131-07 | 241.721 | 21.429 | 0.140 | Low  | 1    | 0.6560445 | 0.63 |
| TCGA-ED-A8O6-01A-11R-A36F-07 | 269.299 | 52.747 | 0.280 | High | 1    | 0.9315024 | 0.31 |
| TCGA-G3-A3CH-01A-11R-A22L-07 | 250.513 | 14.011 | 0.231 | High | 1    | 0.8559659 | 0.32 |
| TCGA-EP-A26S-01A-11R-A16W-07 | 277.035 | 11.813 | 0.162 | Low  | 0.95 | 0.9397402 | 0.19 |
| TCGA-BC-A69I-01A-11R-A311-07 | 264.234 | 12.088 | 0.220 | High | 0.85 | 0.8558551 | 0.2  |
| TCGA-RC-A7S9-01A-11R-A33R-07 | 253.401 | 19.231 | 0.249 | High | 0.9  | 0.9150451 | 0.4  |
| TCGA-BW-A5NQ-01A-11R-A27V-07 | 256.292 | 35.165 | 0.249 | High | 1    | 0.8345288 | 0.29 |
| TCGA-CC-A8HU-01A-11R-A36F-07 | 310.050 | 48.077 | 0.362 | High | 0.9  | 0.9516019 | 0.35 |
| TCGA-BC-A3KF-01A-11R-A213-07 | 274.568 | 35.714 | 0.391 | High | 1    | 0.9196009 | 0.25 |
| TCGA-DD-A4NO-01A-11R-A28V-07 | 268.805 | 65.110 | 0.344 | High | 1    | 0.8810145 | 0.23 |
| TCGA-ED-A7PZ-01A-11R-A33R-07 | 298.805 | 60.989 | 0.330 | High | 1    | 0.9753989 | 0.26 |
| TCGA-DD-AAE0-01A-11R-A41C-07 | 294.683 | 53.297 | 0.327 | High | 0.37 | 0.9147257 | 0.35 |
| TCGA-LG-A9QC-01A-11R-A37K-07 | 273.416 | 30.495 | 0.280 | High | 0.95 | 0.9435021 | 0.22 |
| TCGA-DD-AACD-01A-11R-A41C-07 | 259.914 | 16.209 | 0.230 | High | 0.83 | 0.8277659 | 0.76 |
| TCGA-BC-A217-01A-11R-A155-07 | 293.566 | 51.923 | 0.340 | High | 0.96 | 0.9040577 | 0.19 |
| TCGA-5C-A9VH-01A-11R-A37K-07 | 247.693 | 18.681 | 0.289 | High | 1    | 0.8836631 | 0.68 |
| TCGA-G3-A25Z-01A-11R-A16W-07 | 239.946 | 38.462 | 0.282 | High | 1    | 0.8709873 | 0.21 |
| TCGA-CC-A3MA-01A-11R-A213-07 | 260.424 | 37.637 | 0.264 | High | 0.85 | 0.9046929 | 0.2  |
| TCGA-UB-A7MC-01A-11R-A33R-07 | 290.010 | 45.055 | 0.325 | High | 0.9  | 0.9630525 | 0.23 |
| TCGA-ZP-A9CV-01A-11R-A38B-07 | 279.904 | 10.165 | 0.248 | High | 1    | 0.8093159 | 0.67 |
| TCGA-BD-A2L6-01A-11R-A213-07 | 273.637 | 18.407 | 0.237 | High | 0.9  | 0.8966922 | 0.7  |
| TCGA-GJ-A6C0-01A-12R-A311-07 | 260.885 | 23.626 | 0.278 | High | 0.8  | 0.8270396 | 0.34 |
| TCGA-DD-AAW1-01A-11R-A41C-07 | 246.586 | 10.714 | 0.185 | Low  | 0.85 | 0.9310221 | 0.25 |
| TCGA-DD-AADB-01A-11R-A41C-07 | 259.629 | 31.319 | 0.333 | High | 0.9  | 0.8511496 | 0.22 |
| TCGA-UB-A7MD-01A-12R-A352-07 | 257.889 | 18.132 | 0.242 | High | 0.8  | 0.8214418 | 0.42 |
| TCGA-2Y-A9HA-01A-11R-A39D-07 | 260.797 | 21.154 | 0.322 | High | 0.89 | 0.9344875 | 0.22 |
| TCGA-ZP-A9D1-01A-11R-A38B-07 | 248.282 | 49.725 | 0.283 | High | 0.75 | 0.8382772 | 0.26 |
| TCGA-BC-4073-01B-02R-        | 224.987 | 8.516  | 0.146 | Low  | 0.7  | 0.70859   | 0.51 |

|                              |         |        |       |      |      |               |      |
|------------------------------|---------|--------|-------|------|------|---------------|------|
| A131-07                      |         |        |       |      |      | 51            |      |
| TCGA-G3-A7M9-01A-23R-A352-07 | 253.649 | 48.077 | 0.242 | High | 0.6  | 0.97031<br>39 | 0.3  |
| TCGA-RC-A6M6-01A-11R-A32O-07 | 235.672 | 23.077 | 0.261 | High | 0.62 | 0.95268<br>1  | 0.29 |
| TCGA-CC-A7IH-01A-11R-A33J-07 | 278.554 | 17.582 | 0.251 | High | 1    | 0.94419<br>17 | 0.24 |
| TCGA-DD-A4NH-01A-11R-A27V-07 | 260.406 | 35.440 | 0.356 | High | 0.75 | 0.84718<br>44 | 0.31 |
| TCGA-DD-AAE6-01A-11R-A41C-07 | 300.530 | 57.418 | 0.303 | High | 0.94 | 0.98315<br>07 | 0.34 |
| TCGA-WX-AA44-01A-11R-A39D-07 | 250.887 | 23.077 | 0.284 | High | 0.9  | 0.90687<br>24 | 0.42 |
| TCGA-YA-A8S7-01A-11R-A37K-07 | 234.805 | 28.846 | 0.216 | High | 0.9  | 0.67469<br>76 | 0.21 |
| TCGA-DD-AADG-01A-11R-A41C-07 | 290.507 | 24.451 | 0.238 | High | 0.8  | 0.95059<br>17 | 0.48 |
| TCGA-DD-A4NL-01A-11R-A28V-07 | 218.028 | 0.000  | 0.028 | Low  | 1    | 0.85296<br>37 | 0.24 |
| TCGA-G3-A6UC-01A-21R-A33J-07 | 285.104 | 20.879 | 0.289 | High | 1    | 0.94775<br>47 | 0.66 |
| TCGA-ED-A66Y-01A-11R-A311-07 | 283.584 | 17.857 | 0.166 | Low  | 0.9  | 0.97061<br>46 | 0.57 |
| TCGA-DD-A11B-01A-11R-A131-07 | 287.640 | 23.626 | 0.342 | High | 0.9  | 0.93633<br>5  | 0.21 |
| TCGA-BC-A10X-01A-11R-A131-07 | 259.259 | 0.000  | 0.047 | Low  | 0.5  | 0.77139<br>66 | 0.3  |
| TCGA-DD-AAVW-01A-11R-A41C-07 | 223.770 | 30.769 | 0.342 | High | 0.8  | 0.78316<br>69 | 0.39 |
| TCGA-ED-A7XP-01A-11R-A352-07 | 274.684 | 28.571 | 0.371 | High | 0.88 | 0.86228<br>92 | 0.69 |
| TCGA-2Y-A9H9-01A-21R-A39D-07 | 243.947 | 25.549 | 0.248 | High | 0.95 | 0.89014<br>43 | 0.27 |
| TCGA-2Y-A9H2-01A-12R-A38B-07 | 255.452 | 68.956 | 0.309 | High | 0.7  | 0.89843<br>82 | 0.52 |
| TCGA-DD-A1EI-01A-11R-A131-07 | 238.839 | 25.549 | 0.356 | High | 0.7  | 0.83466<br>95 | 0.17 |
| TCGA-CC-A7IJ-01A-11R-A33R-07 | 252.727 | 25.824 | 0.176 | Low  | 1    | 0.60494<br>08 | 0.23 |
| TCGA-DD-AADN-01A-11R-A41C-07 | 261.727 | 41.484 | 0.194 | Low  | 0.9  | 0.79656<br>95 | 0.3  |
| TCGA-CC-A3MB-01A-11R-A213-07 | 249.434 | 48.077 | 0.309 | High | 0.85 | 0.92444<br>93 | 0.31 |
| TCGA-ED-A7PY-01A-11R-A33R-07 | 284.925 | 39.286 | 0.307 | High | 1    | 0.95853<br>81 | 0.41 |
| TCGA-DD-AA3A-01A-11R-A37K-07 | 284.291 | 34.066 | 0.273 | High | 0.95 | 0.95551<br>92 | 0.75 |
| TCGA-DD-AAD3-01A-11R-A41C-07 | 244.863 | 23.626 | 0.342 | High | 0.9  | 0.81186<br>55 | 0.26 |
| TCGA-FV-A2QQ-01A-11R-A22L-07 | 244.218 | 11.538 | 0.251 | High | 0.95 | 0.84766<br>45 | 0.21 |
| TCGA-5R-AAAM-01A-12R-A41C-07 | 203.303 | 7.967  | 0.199 | Low  | 0.5  | 0.73456<br>93 | 0.24 |
| TCGA-ED-A66X-01A-11R-A311-07 | 266.578 | 27.198 | 0.305 | High | 0.35 | 0.76515<br>2  | 0.2  |
| TCGA-G3-A25U-01A-11R-A16W-07 | 267.606 | 22.527 | 0.306 | High | 1    | 0.94300<br>74 | 0.41 |
| TCGA-DD-AACJ-01A-11R-A41C-07 | 277.233 | 26.374 | 0.288 | High | 0.8  | 0.94419<br>75 | 0.19 |
| TCGA-UB-AA0V-01A-11R-        | 220.563 | 0.000  | 0.008 | Low  | 1    | 0.81200       | 0.57 |

|                               |         |        |       |      |      |           |      |
|-------------------------------|---------|--------|-------|------|------|-----------|------|
| A38B-07                       |         |        |       |      |      | 6         |      |
| TCGA-G3-A5SJ-01A-11R-A27V-07  | 255.690 | 23.901 | 0.311 | High | 0.9  | 0.8370602 | 0.74 |
| TCGA-UB-A7MB-01A-11R-A33R-07  | 263.841 | 19.231 | 0.282 | High | 0.9  | 0.9580805 | 0.23 |
| TCGA-DD-A3A5-01A-11R-A22L-07  | 281.575 | 22.253 | 0.234 | High | 0.9  | 0.903391  | 0.82 |
| TCGA-UB-A7MA-01A-11R-A33R-07  | 280.343 | 53.022 | 0.342 | High | 0.9  | 0.9214138 | 0.27 |
| TCGA-WQ-A9G7-01A-11R-A37K-07  | 279.912 | 43.681 | 0.243 | High | 1    | 0.9546152 | 0.24 |
| TCGA-WQ-AB4B-01A-11R-A41C-07  | 273.634 | 31.593 | 0.231 | High | 1    | 0.8503743 | 0.27 |
| TCGA-G3-A7M5-01A-11R-A33R-07  | 261.025 | 18.681 | 0.263 | High | 0.85 | 0.9135946 | 0.29 |
| TCGA-BC-A10T-01A-11R-A131-07  | 250.639 | 28.297 | 0.301 | High | 0.9  | 0.8455599 | 0.61 |
| TCGA-O8-A75V-01A-11R-A32O-07  | 249.770 | 31.868 | 0.344 | High | 1    | 0.8007047 | 0.3  |
| TCGA-DD-AAADY-01A-11R-A41C-07 | 308.982 | 95.055 | 0.333 | High | 1    | 0.929291  | 0.38 |
| TCGA-K7-A5RG-01A-11R-A28V-07  | 248.873 | 0.000  | 0.283 | High | 0.85 | 0.6415521 | 0.22 |
| TCGA-2Y-A9H3-01A-11R-A38B-07  | 274.932 | 20.330 | 0.193 | Low  | 0.75 | 0.7345554 | 0.24 |
| TCGA-DD-AAEI-01A-11R-A41C-07  | 239.036 | 18.681 | 0.218 | High | 1    | 0.8629174 | 0.77 |
| TCGA-3K-AAZ8-01A-12R-A39D-07  | 303.124 | 11.813 | 0.287 | High | 0.96 | 0.9069565 | 0.21 |
| TCGA-DD-AAVZ-01A-11R-A41C-07  | 279.609 | 24.725 | 0.374 | High | 0.85 | 0.9117619 | 0.68 |
| TCGA-CC-A7IK-01A-12R-A33R-07  | 302.725 | 59.615 | 0.303 | High | 1    | 0.9673148 | 0.34 |
| TCGA-K7-A5RF-01A-11R-A28V-07  | 229.443 | 0.000  | 0.086 | Low  | 0.85 | 0.7334438 | 0.59 |
| TCGA-BC-A10W-01A-11R-A131-07  | 261.296 | 29.945 | 0.358 | High | 0.9  | 0.8736764 | 0.7  |
| TCGA-DD-AADS-01A-11R-A41C-07  | 267.493 | 10.989 | 0.143 | Low  | 0.85 | 0.8217606 | 0.25 |
| TCGA-G3-A3CI-01A-11R-A213-07  | 208.805 | 0.549  | 0.059 | Low  | 1    | 0.8300952 | 1    |
| TCGA-G3-A7M6-01A-11R-A33R-07  | 281.204 | 27.198 | 0.301 | High | 0.8  | 0.9027321 | 0.33 |
| TCGA-G3-A3CG-01A-11R-A213-07  | 240.411 | 18.407 | 0.217 | High | 0.98 | 0.8690638 | 0.3  |
| TCGA-DD-A73A-01A-12R-A32O-07  | 229.537 | 8.791  | 0.230 | High | 0.9  | 0.8801171 | 0.29 |
| TCGA-G3-A25V-01A-11R-A16W-07  | 223.624 | 0.275  | 0.086 | Low  | 1    | 0.7797653 | 1    |
| TCGA-DD-A4ND-01A-11R-A266-07  | 263.787 | 42.033 | 0.320 | High | 1    | 0.7186995 | 0.37 |
| TCGA-2Y-A9GZ-01A-11R-A39D-07  | 276.307 | 48.352 | 0.285 | High | 0.8  | 0.9456446 | 0.22 |
| TCGA-DD-A73G-01A-22R-A32O-07  | 305.272 | 19.231 | 0.193 | Low  | 0.65 | 0.8786439 | 0.21 |
| TCGA-CC-A7IE-01A-21R-A38B-07  | 267.851 | 26.374 | 0.249 | High | 1    | 0.8352591 | 0.19 |
| TCGA-DD-AAVS-01A-11R-A41C-07  | 264.074 | 34.615 | 0.379 | High | 0.8  | 0.9062485 | 0.79 |
| TCGA-DD-A73C-01A-12R-         | 265.055 | 7.143  | 0.111 | Low  | 0.97 | 0.86399   | 0.65 |

|                              |         |        |       |      |      |               |      |
|------------------------------|---------|--------|-------|------|------|---------------|------|
| A33J-07                      |         |        |       |      |      | 33            |      |
| TCGA-DD-A3A2-01A-11R-A213-07 | 257.524 | 7.143  | 0.100 | Low  | 0.95 | 0.89886<br>32 | 0.34 |
| TCGA-DD-AADK-01A-11R-A41C-07 | 267.315 | 22.802 | 0.363 | High | 0.5  | 0.83387<br>31 | 0.41 |
| TCGA-DD-A1EE-01A-11R-A131-07 | 268.539 | 15.934 | 0.262 | High | 1    | 0.94112<br>66 | 0.3  |
| TCGA-ZS-A9CF-01A-11R-A38B-07 | 263.806 | 26.099 | 0.306 | High | 0.65 | 0.89913<br>96 | 0.28 |
| TCGA-G3-AAV1-01A-11R-A38B-07 | 258.116 | 46.703 | 0.307 | High | 0.85 | 0.91614<br>94 | 0.28 |
| TCGA-XR-A8TE-01A-11R-A36F-07 | 270.509 | 21.429 | 0.143 | Low  | 0.8  | 0.90054<br>51 | 0.28 |
| TCGA-DD-AAE1-01A-11R-A41C-07 | 291.615 | 27.747 | 0.326 | High | 0.97 | 0.91971<br>39 | 0.78 |
| TCGA-DD-A115-01A-11R-A131-07 | 257.596 | 26.099 | 0.301 | High | 0.9  | 0.86036<br>67 | 0.27 |
| TCGA-DD-A1EB-01A-11R-A131-07 | 247.446 | 20.055 | 0.179 | Low  | 1    | 0.89329<br>79 | 0.7  |
| TCGA-ED-A627-01A-12R-A311-07 | 249.484 | 0.275  | 0.000 | Low  | 0.8  | 0.63003<br>89 | 0.2  |
| TCGA-DD-AACF-01A-11R-A41C-07 | 258.093 | 27.198 | 0.290 | High | 0.6  | 0.89336<br>25 | 0.31 |
| TCGA-DD-AACX-01A-11R-A41C-07 | 254.264 | 17.033 | 0.218 | High | 1    | 0.93606<br>98 | 0.47 |
| TCGA-DD-AACC-01A-11R-A41C-07 | 255.230 | 21.703 | 0.235 | High | 0.78 | 0.58694<br>94 | 0.32 |
| TCGA-DD-AACZ-01A-11R-A41C-07 | 238.200 | 53.297 | 0.267 | High | 1    | 0.73171<br>22 | 0.24 |
| TCGA-CC-A9FW-01A-11R-A37K-07 | 258.823 | 73.626 | 0.336 | High | 0.89 | 0.94513<br>65 | 0.29 |
| TCGA-2Y-A9GV-01A-11R-A38B-07 | 244.556 | 10.165 | 0.234 | High | 1    | 0.81074<br>13 | 0.29 |
| TCGA-5C-A9VG-01A-11R-A37K-07 | 275.033 | 20.330 | 0.196 | Low  | 0.5  | 0.91708<br>89 | 0.24 |
| TCGA-DD-AAVR-01A-11R-A41C-07 | 230.023 | 19.231 | 0.226 | High | 0.8  | 0.68807<br>51 | 0.52 |
| TCGA-BC-A8YO-01A-11R-A37K-07 | 244.285 | 16.484 | 0.282 | High | 0.8  | 0.84479<br>41 | 0.43 |
| TCGA-DD-AAEA-01A-11R-A41C-07 | 271.162 | 28.846 | 0.268 | High | 0.95 | 0.89707<br>26 | 0.58 |
| TCGA-QA-A7B7-01A-11R-A32O-07 | 280.574 | 27.747 | 0.305 | High | 0.9  | 0.94526<br>44 | 0.21 |
| TCGA-DD-A4NS-01A-11R-A311-07 | 243.184 | 0.000  | 0.155 | Low  | 0.85 | 0.71952<br>57 | 0.27 |
| TCGA-HP-A5MZ-01A-21R-A27V-07 | 255.449 | 7.692  | 0.269 | High | 0.73 | 0.68015<br>15 | 0.21 |
| TCGA-MR-A8JO-01A-12R-A36F-07 | 233.384 | 8.516  | 0.175 | Low  | 0.65 | 0.67085<br>32 | 0.28 |
| TCGA-2Y-A9GX-01A-11R-A38B-07 | 255.646 | 6.593  | 0.183 | Low  | 0.9  | 0.65153<br>72 | 0.25 |
| TCGA-DD-A73E-01A-12R-A32O-07 | 259.853 | 23.077 | 0.258 | High | 0.88 | 0.96657<br>33 | 0.39 |
| TCGA-DD-AADQ-01A-11R-A41C-07 | 258.256 | 12.912 | 0.279 | High | 0.9  | 0.91527<br>47 | 0.87 |
| TCGA-DD-A1EJ-01A-11R-A155-07 | 269.060 | 44.505 | 0.290 | High | 0.85 | 0.91893<br>24 | 0.24 |
| TCGA-KR-A7K7-01A-11R-A33J-07 | 267.241 | 57.692 | 0.245 | High | 1    | 0.87189<br>38 | 0.2  |
| TCGA-DD-AACY-01A-11R-        | 275.482 | 19.780 | 0.308 | High | 1    | 0.89810       | 0.26 |



|                              |         |        |       |      |      |           |      |
|------------------------------|---------|--------|-------|------|------|-----------|------|
| A41C-07                      |         |        |       |      |      | 99        |      |
| TCGA-UB-A7ME-01A-11R-A33J-07 | 283.236 | 36.264 | 0.336 | High | 0.85 | 0.8196379 | 0.19 |
| TCGA-G3-A25Y-01A-11R-A16W-07 | 266.442 | 29.670 | 0.312 | High | 1    | 0.8412222 | 0.24 |
| TCGA-DD-A4NV-01A-11R-A311-07 | 244.035 | 12.363 | 0.298 | High | 0.9  | 0.8612124 | 0.29 |
| TCGA-DD-A1EG-01A-11R-A213-07 | 236.043 | 32.418 | 0.301 | High | 0.85 | 0.76099   | 0.38 |
| TCGA-ED-A7PX-01A-51R-A352-07 | 254.024 | 34.341 | 0.231 | High | 1    | 0.8432449 | 0.25 |
| TCGA-CC-A7IF-01A-11R-A33J-07 | 276.199 | 34.066 | 0.306 | High | 1    | 0.9488624 | 0.67 |
| TCGA-G3-AAV0-01A-11R-A37K-07 | 275.941 | 17.308 | 0.274 | High | 0.85 | 0.9064122 | 0.38 |
| TCGA-G3-A5SM-01A-12R-A28V-07 | 231.490 | 26.099 | 0.270 | High | 0.7  | 0.7861815 | 0.22 |
| TCGA-DD-AAED-01A-12R-A41C-07 | 283.887 | 40.385 | 0.308 | High | 1    | 0.9511561 | 0.26 |
| TCGA-5R-AA1D-01A-11R-A38B-07 | 217.686 | 5.769  | 0.081 | Low  | 0.8  | 0.6642629 | 0.61 |
| TCGA-DD-AACV-01A-11R-A41C-07 | 311.248 | 34.341 | 0.305 | High | 1    | 0.9724159 | 0.28 |
| TCGA-CC-A5UD-01A-11R-A28V-07 | 254.674 | 89.560 | 0.216 | High | 0.89 | 0.9482769 | 0.83 |
| TCGA-CC-A9FS-01A-11R-A37K-07 | 290.146 | 25.549 | 0.369 | High | 0.93 | 0.9246406 | 0.23 |
| TCGA-DD-AAVQ-01A-11R-A41C-07 | 276.037 | 17.033 | 0.290 | High | 0.75 | 0.7212249 | 0.3  |
| TCGA-RC-A7SB-01A-21R-A352-07 | 257.526 | 20.604 | 0.308 | High | 1    | 0.9317978 | 0.21 |
| TCGA-BW-A5NP-01A-11R-A27V-07 | 310.660 | 54.396 | 0.360 | High | 1    | 0.9695631 | 0.24 |
| TCGA-DD-AADJ-01A-11R-A41C-07 | 250.854 | 18.132 | 0.245 | High | 0.9  | 0.9142232 | 0.7  |
| TCGA-DD-AACN-01A-11R-A41C-07 | 315.793 | 35.165 | 0.372 | High | 0.7  | 0.8644622 | 0.22 |
| TCGA-DD-AAD1-01A-11R-A41C-07 | 232.528 | 12.637 | 0.237 | High | 0.9  | 0.7417486 | 0.46 |
| TCGA-BC-A69H-01A-11R-A311-07 | 250.696 | 56.044 | 0.257 | High | 0.85 | 0.8699143 | 0.21 |
| TCGA-BC-A10R-01A-11R-A131-07 | 267.189 | 67.033 | 0.323 | High | 0.95 | 0.8702934 | 0.22 |
| TCGA-ZS-A9CE-01A-11R-A37K-07 | 286.428 | 29.396 | 0.237 | High | 0.8  | 0.9569814 | 0.32 |
| TCGA-DD-AAD0-01A-11R-A41C-07 | 241.656 | 17.033 | 0.232 | High | 0.75 | 0.9580717 | 0.84 |
| TCGA-ZP-A9D4-01A-11R-A37K-07 | 259.397 | 17.033 | 0.225 | High | 1    | 0.9394664 | 0.86 |
| TCGA-4R-AA8I-01A-11R-A38B-07 | 255.103 | 9.066  | 0.296 | High | 0.9  | 0.9060051 | 0.22 |
| TCGA-FV-A3R3-01A-11R-A22L-07 | 217.858 | 6.868  | 0.125 | Low  | 1    | 0.7593525 | 0.45 |
| TCGA-LG-A6GG-01A-11R-A311-07 | 280.364 | 48.626 | 0.313 | High | 0.92 | 0.936139  | 0.29 |
| TCGA-DD-AAO0-01A-11R-A41C-07 | 292.296 | 43.407 | 0.269 | High | 0.85 | 0.8266276 | 0.2  |
| TCGA-2Y-A9H1-01A-11R-A38B-07 | 273.908 | 18.132 | 0.218 | High | 0.85 | 0.8566748 | 0.79 |
| TCGA-BC-A10Y-01A-11R-        | 260.666 | 26.923 | 0.247 | High | 0.85 | 0.89578   | 0.26 |

|                              |         |        |        |      |      |           |      |
|------------------------------|---------|--------|--------|------|------|-----------|------|
| A131-07                      |         |        |        |      |      | 19        |      |
| TCGA-G3-A5SI-01A-31R-A27V-07 | 281.584 | 28.846 | 0.293  | High | 0.85 | 0.9530955 | 0.89 |
| TCGA-CC-A5UE-01A-11R-A28V-07 | 280.305 | 45.604 | 0.321  | High | 0.93 | 0.9599582 | 0.27 |
| TCGA-DD-AADU-01A-11R-A41C-07 | 267.753 | 83.791 | 0.244  | High | 0.4  | 0.946841  | 0.29 |
| TCGA-DD-AAW3-01A-11R-A41C-07 | 298.783 | 21.154 | 0.327  | High | 0.8  | 0.9377396 | 0.72 |
| TCGA-G3-AAV5-01A-11R-A37K-07 | 269.221 | 31.593 | 0.233  | High | 1    | 0.9356219 | 0.3  |
| TCGA-CC-A7IL-01A-11R-A33R-07 | 304.318 | 50.000 | 0.320  | High | 1    | 0.9714695 | 0.2  |
| TCGA-DD-AAE4-01A-11R-A41C-07 | 262.484 | 15.934 | 0.167  | Low  | 1    | 0.7071768 | 0.21 |
| TCGA-2Y-A9GT-01A-11R-A38B-07 | 220.526 | 1.923  | 0.172  | Low  | 1    | 0.7505614 | 0.49 |
| TCGA-DD-AACH-01A-11R-A41C-07 | 243.067 | 34.341 | 0.326  | High | 0.8  | 0.8958302 | 0.79 |
| TCGA-EP-A2KA-01A-11R-A180-07 | 236.229 | 23.901 | 0.222  | High | 0.95 | 0.8272054 | 0.27 |
| TCGA-DD-AADI-01A-11R-A41C-07 | 271.844 | 26.099 | 0.273  | High | 0.9  | 0.7628809 | 0.57 |
| TCGA-RC-A6M4-01A-11R-A32O-07 | 265.721 | 39.560 | 0.273  | High | 0.8  | 0.9658891 | 0.25 |
| TCGA-RC-A6M3-01A-11R-A32O-07 | 270.870 | 48.626 | 0.203  | High | 0.9  | 0.9417551 | 0.21 |
| TCGA-DD-A3A9-01A-11R-A266-07 | 283.756 | 65.385 | 0.266  | High | 0.7  | 0.8103622 | 0.19 |
| TCGA-G3-A25T-01A-11R-A16W-07 | 285.980 | 14.286 | 0.195  | Low  | 1    | 0.8851941 | 0.25 |
| TCGA-ES-A2HT-01A-12R-A180-07 | 261.613 | 11.538 | 0.186  | Low  | 0.9  | 0.832763  | 0.59 |
| TCGA-ES-A2HS-01A-11R-A180-07 | 311.565 | 32.143 | 0.251  | High | 0.9  | 0.9053098 | 0.28 |
| TCGA-KR-A7K0-01A-12R-A33R-07 | 251.401 | 5.220  | 0.190  | Low  | 1    | 0.8834465 | 0.23 |
| TCGA-K7-AAU7-01A-11R-A38B-07 | 222.761 | 14.560 | 0.252  | High | 1    | 0.8524845 | 0.53 |
| TCGA-DD-A73F-01A-11R-A32O-07 | 240.798 | 10.165 | 0.208  | High | 0.73 | 0.7263722 | 0.25 |
| TCGA-G3-AAV6-01A-21R-A37K-07 | 287.045 | 70.330 | 0.293  | High | 1    | 0.9580632 | 0.26 |
| TCGA-DD-AACL-01A-11R-A41C-07 | 252.838 | 29.396 | 0.244  | High | 0.65 | 0.7682261 | 0.27 |
| TCGA-XR-A8TD-01A-12R-A39D-07 | 249.095 | 27.747 | 0.245  | High | 0.75 | 0.6555336 | 0.44 |
| TCGA-DD-A11C-01A-11R-A131-07 | 244.326 | 51.923 | 0.264  | High | 0.8  | 0.8347737 | 0.44 |
| TCGA-MR-A520-01A-11R-A266-07 | 250.506 | 0.000  | -0.016 | Low  | 0.7  | 0.9073543 | 0.7  |
| TCGA-DD-AAVU-01A-11R-A41C-07 | 282.965 | 87.637 | 0.298  | High | 0.8  | 0.9410124 | 0.67 |
| TCGA-2Y-A9GY-01A-11R-A38B-07 | 262.723 | 42.308 | 0.279  | High | 1    | 0.8161634 | 0.21 |
| TCGA-DD-A39V-01A-11R-A213-07 | 241.350 | 25.549 | 0.233  | High | 0.8  | 0.7975145 | 0.25 |
| TCGA-BC-A112-01A-11R-A131-07 | 221.344 | 28.571 | 0.272  | High | 0.8  | 0.8601886 | 0.18 |
| TCGA-ZP-A9CY-01A-11R-        | 249.760 | 3.022  | 0.142  | Low  | 1    | 0.82915   | 0.22 |

|                              |         |        |       |      |      |               |      |
|------------------------------|---------|--------|-------|------|------|---------------|------|
| A38B-07                      |         |        |       |      |      | 68            |      |
| TCGA-CC-A3M9-01A-11R-A213-07 | 284.039 | 28.022 | 0.115 | Low  | 0.7  | 0.44901       | 0.25 |
| TCGA-2Y-A9HB-01A-11R-A39D-07 | 254.293 | 17.308 | 0.232 | High | 0.9  | 0.81743<br>79 | 0.61 |
| TCGA-DD-AADR-01A-11R-A41C-07 | 241.027 | 31.319 | 0.287 | High | 0.9  | 0.89573<br>76 | 0.24 |
| TCGA-G3-AAUZ-01A-11R-A38B-07 | 271.209 | 23.626 | 0.221 | High | 0.85 | 0.82747<br>67 | 0.25 |
| TCGA-MI-A75C-01A-11R-A32O-07 | 282.129 | 16.484 | 0.220 | High | 0.93 | 0.92868<br>36 | 0.64 |

**Table S1c. Table for PCC of LCI cohort**

| <b>Sample ID</b> | <b>PCC</b> | <b>Group</b> |
|------------------|------------|--------------|
| LCS_004A         | -0.0168    | Low          |
| LCS_007A         | 0.0477     | Low          |
| LCS_023A         | 0.1302     | High         |
| LCS_067A         | 0.1584     | High         |
| LCS_065A         | 0.1331     | High         |
| LCS_073A         | 0.0779     | Low          |
| LCS_024A         | 0.1620     | High         |
| LCS_042A         | 0.2200     | High         |
| LCS_062A         | 0.1259     | High         |
| LCS_015A         | 0.1077     | High         |
| LCS_069A         | 0.1808     | High         |
| LCS_033A         | 0.0652     | Low          |
| LCS_061A         | 0.1397     | High         |
| LCS_020A         | 0.0613     | Low          |
| LCS_045A         | 0.1535     | High         |
| LCS_057A         | 0.1688     | High         |
| LCS_009A         | 0.2959     | High         |
| LCS_049A         | 0.0640     | Low          |
| LCS_047A         | 0.2006     | High         |
| LCS_075A         | 0.0594     | Low          |
| LCS_034A         | 0.0456     | Low          |
| LCS_041A         | 0.2258     | High         |
| LCS_044A         | -0.0030    | Low          |
| LCS_071A         | 0.1441     | High         |
| LCS_036A         | 0.1864     | High         |
| LCS_064A         | 0.2237     | High         |
| LCS_038A         | 0.1564     | High         |
| LCS_002A         | 0.0885     | Low          |
| LCS_054A         | 0.1344     | High         |
| LCS_063A         | 0.1109     | High         |
| LCS_022A         | 0.1863     | High         |
| LCS_025A         | 0.0539     | Low          |
| LCS_066A         | 0.1591     | High         |
| LCS_027A         | 0.1703     | High         |
| LCS_048A         | 0.0992     | Low          |
| LCS_012A         | 0.1333     | High         |
| LCS_051A         | 0.1051     | High         |

|          |        |      |
|----------|--------|------|
| LCS_056A | 0.1909 | High |
| LCS_028A | 0.1985 | High |
| LCS_016A | 0.1540 | High |
| LCS_196A | 0.1571 | High |
| LCS_072A | 0.1593 | High |
| LCS_357A | 0.1484 | High |
| LCS_005A | 0.1554 | High |
| LCS_019A | 0.1922 | High |
| LCS_029A | 0.1017 | High |
| LCS_039A | 0.0971 | Low  |
| LCS_254A | 0.0431 | Low  |
| LCS_068A | 0.0990 | Low  |
| LCS_076A | 0.3269 | High |
| LCS_333A | 0.2193 | High |
| LCS_339A | 0.0606 | Low  |
| LCS_341A | 0.0750 | Low  |
| LCS_343A | 0.1621 | High |
| LCS_344A | 0.1981 | High |
| LCS_346A | 0.1155 | High |
| LCS_347A | 0.2424 | High |
| LCS_393A | 0.1158 | High |
| LCS_400A | 0.2249 | High |
| LCS_401A | 0.1066 | High |
| LCS_403A | 0.1890 | High |
| LCS_406A | 0.1228 | High |
| LCS_415A | 0.1272 | High |
| LCS_424A | 0.2341 | High |
| LCS_426A | 0.1391 | High |

**Table S2. Overlapped Differentially Expressed Genes among correlated genes between Thai HCC and Thai iCCA**

|                | Probe ID       | Official Symbol | HCC         |             |        |             |         | iCCA   |             |             |        |             |         |        |
|----------------|----------------|-----------------|-------------|-------------|--------|-------------|---------|--------|-------------|-------------|--------|-------------|---------|--------|
|                |                |                 | LFGC (Mean) | HFGC (Mean) | perm.p | Fold Change | cor.r   | cor.p  | LFGC (Mean) | HFGC (Mean) | perm.p | Fold Change | cor.r   | cor.p  |
| <b>HFGC_UP</b> | TC17001769.hg  | BRP1            | 0.0142      | 1.1001      | 0.0017 | 1.0860      | 0.5851  | 0.0000 | 0.2369      | 0.9013      | 0.0024 | 0.6645      | 0.4350  | 0.0000 |
|                | TC05000134.hg  | C5orf22         | 0.0416      | 0.6175      | 0.0018 | 0.5759      | 0.5762  | 0.0000 | -0.0638     | 0.6110      | 0.0000 | 0.6748      | 0.5907  | 0.0000 |
|                | TC03001882.hg  | HLTF            | 0.1843      | 1.0937      | 0.0028 | 0.9094      | 0.5510  | 0.0000 | -0.2542     | 0.5102      | 0.0015 | 0.7644      | 0.4663  | 0.0000 |
|                | TC08000701.hg  | MTBP            | 0.0354      | 0.8016      | 0.0004 | 0.7662      | 0.5097  | 0.0000 | 0.1454      | 0.8641      | 0.0001 | 0.7187      | 0.6017  | 0.0000 |
|                | TC01001781.hg  | FLVCR1          | 0.4805      | 1.4848      | 0.0008 | 1.0043      | 0.5002  | 0.0000 | 0.3281      | 1.0638      | 0.0002 | 0.7357      | 0.4285  | 0.0000 |
|                | TC10001914.hg  | -               | 0.1514      | 0.7716      | 0.0039 | 0.6202      | 0.4810  | 0.0001 | -0.0738     | 0.5058      | 0.0001 | 0.5796      | 0.4807  | 0.0000 |
|                | TC19001630.hg  | -               | -0.2373     | 0.6659      | 0.0039 | 0.9032      | 0.4580  | 0.0002 | -0.1117     | 0.6015      | 0.0003 | 0.7133      | 0.3103  | 0.0029 |
|                | TC01005322.hg  | -               | -0.2565     | 0.3482      | 0.0031 | 0.6046      | 0.4102  | 0.0009 | -0.1403     | 0.5285      | 0.0014 | 0.6688      | 0.6045  | 0.0000 |
|                | TC20000063.hg  | MCM8            | 0.0263      | 0.9355      | 0.0043 | 0.9093      | 0.3707  | 0.0030 | 0.4325      | 1.5114      | 0.0000 | 1.0789      | 0.5561  | 0.0000 |
|                | TC07001654.hg  | MCM7            | -0.0801     | 0.6606      | 0.0006 | 0.7408      | 0.3695  | 0.0031 | 0.1244      | 0.9751      | 0.0000 | 0.8507      | 0.5547  | 0.0000 |
|                | TC05000161.hg  | SKP2            | -0.0199     | 1.0414      | 0.0009 | 1.0614      | 0.3537  | 0.0048 | -0.8532     | 0.1413      | 0.0000 | 0.9945      | 0.5339  | 0.0000 |
|                | TC09002185.hg  | -               | -0.1209     | 0.7151      | 0.0039 | 0.8360      | 0.3309  | 0.0086 | -0.5622     | -0.0146     | 0.0003 | 0.5477      | 0.3671  | 0.0004 |
|                | TC01002916.hg  | SASS6           | -0.0896     | 0.6298      | 0.0030 | 0.7194      | 0.3192  | 0.0114 | 0.3593      | 1.0462      | 0.0001 | 0.6868      | 0.3587  | 0.0005 |
|                | TC20000784.hg  | PIGU            | 0.2316      | 1.0044      | 0.0015 | 0.7728      | 0.2949  | 0.0200 | 0.1652      | 0.8425      | 0.0000 | 0.6773      | 0.6154  | 0.0000 |
|                | TC08000695.hg  | MAL2            | -0.9544     | 0.2122      | 0.0025 | 1.1665      | 0.2941  | 0.0203 | 0.6231      | 1.6283      | 0.0001 | 1.0052      | 0.5509  | 0.0000 |
|                | TC17002618.hg  | -               | 0.1968      | 1.9895      | 0.0049 | 1.7927      | 0.2895  | 0.0225 | 1.4700      | 3.0272      | 0.0000 | 1.5572      | 0.3490  | 0.0007 |
|                | TC12001605.hg  | TIMELESS        | 0.0507      | 0.8189      | 0.0017 | 0.7682      | 0.2763  | 0.0297 | -0.3542     | 0.3319      | 0.0002 | 0.6860      | 0.5740  | 0.0000 |
| <b>HFGC_DN</b> | TC16000443.hg  | CYLD            | 0.1088      | -0.4176     | 0.0008 | -0.5264     | 0.6379  | 0.0000 | 0.1743      | -0.5150     | 0.0000 | -0.6893     | 0.3223  | 0.0019 |
|                | TC04001323.hg  | CNOT6L          | 0.3452      | -0.3297     | 0.0003 | -0.6749     | 0.6173  | 0.0000 | 0.1911      | -0.3290     | 0.0002 | -0.5201     | 0.4735  | 0.0000 |
|                | TC05001570.hg  | CCNH            | 0.0704      | -0.5432     | 0.0003 | -0.6136     | 0.4298  | 0.0005 | 0.0399      | -0.5382     | 0.0000 | -0.5782     | 0.6222  | 0.0000 |
|                | TC09000035.hg  | JAK2            | 0.1345      | -0.5793     | 0.0010 | -0.7138     | 0.4244  | 0.0006 | 0.9534      | 0.2215      | 0.0012 | -0.7319     | 0.3768  | 0.0003 |
|                | TC05001367.hg  | LOC100652914    | 0.2876      | -0.5078     | 0.0045 | -0.7954     | 0.3987  | 0.0013 | -0.8985     | -1.5924     | 0.0001 | -0.6939     | 0.2842  | 0.0066 |
|                | TC09000037.hg  | CD274           | 0.3362      | -0.3846     | 0.0012 | -0.7208     | 0.3534  | 0.0048 | 0.3626      | -0.3030     | 0.0011 | -0.6655     | 0.3748  | 0.0003 |
|                | TC09001325.hg  | NFIL3           | -0.0454     | -0.8257     | 0.0034 | -0.7803     | 0.3426  | 0.0064 | -0.6668     | -1.3746     | 0.0003 | -0.7078     | 0.2388  | 0.0234 |
|                | TC11002246.hg  | CASP4           | 0.1596      | -0.5252     | 0.0007 | -0.6848     | 0.3013  | 0.0173 | 0.3340      | -0.1859     | 0.0008 | -0.5199     | 0.4825  | 0.0000 |
|                | TC17002849.hg  | PER1            | 0.0407      | -0.6408     | 0.0010 | -0.6814     | 0.2963  | 0.0194 | -0.3776     | -0.9433     | 0.0001 | -0.5657     | 0.2691  | 0.0103 |
|                | TC17001053.hg  | SCIMP           | 0.2858      | -0.6687     | 0.0002 | -0.9545     | 0.2812  | 0.0269 | -0.0821     | -0.6832     | 0.0009 | -0.6011     | 0.3166  | 0.0024 |
|                | TC080000310.hg | C8orf4          | -0.4859     | -1.8605     | 0.0033 | -1.3745     | 0.2598  | 0.0414 | -0.0326     | -1.2503     | 0.0001 | -1.2176     | 0.2699  | 0.0101 |
|                | TC07001295.hg  | TRGV10          | 0.3831      | -0.3456     | 0.0012 | -0.7288     | -0.2387 | 0.0617 | 0.2736      | -0.5858     | 0.0000 | -0.8594     | -0.2417 | 0.0217 |

**Table S3. Comparison table of overlapped differentially expressed genes among correlated genes.**

| Comparison                                 | Overlapped gene                                                                                                                                                                                                                                                                                                                                                                                                                                                                                                                                                                                |                                                                                                                             |
|--------------------------------------------|------------------------------------------------------------------------------------------------------------------------------------------------------------------------------------------------------------------------------------------------------------------------------------------------------------------------------------------------------------------------------------------------------------------------------------------------------------------------------------------------------------------------------------------------------------------------------------------------|-----------------------------------------------------------------------------------------------------------------------------|
|                                            | HFGC_UP                                                                                                                                                                                                                                                                                                                                                                                                                                                                                                                                                                                        | HFGC_DN                                                                                                                     |
| <b>Thai HCC vs. Thai iCCA</b>              | FLVCR1, SASS6, HLTF, C5orf22, SKP2, MCM7, MAL2, MTBP, TIMELESS, BRIP1, FIGU                                                                                                                                                                                                                                                                                                                                                                                                                                                                                                                    | CNOT6L, C8orf4, JAK2, NFIL3, CASP4, CYLD, SCIMP                                                                             |
| <b>Thai HCC vs. TCGA_HCC</b>               | ANXA9, ASPM, BRIP1, BRPF3, CAP2, CENPQ, FDPS, FLVCR1, INTS7, MAL2, MCM3, MCM7, MOGAT3, MTBP, PRIM2, SASS6, SQLE, STXBP6, TIMELESS, VPS72, ZNF572                                                                                                                                                                                                                                                                                                                                                                                                                                               | ALPK1, AOA4, SCIMP, CHD9, COTL1, EPSTI1, FYB, HLA-DOA, IRF8, NDEL1, NFIL3, PPM1K, RGS2, SLAMF6, ZC3H13                      |
| <b>Thai iCCA vs. TCGA_HCC</b>              | ACTL6A, ANKRD27, ATAD2, ATAD5, AURKA, BRCA1, BRIP1, PARPBP, BORA, CASC5, CEP85, CCT3, CDC20, CDC45, CDC6, CDCA8, CENPA, CENPO, CKS2, DNA2, DSCC1, DSN1, E2F7, ECT2, EFNA4, EZH2, FAM83D, FANCD2, FANCI, FLVCR1, FOXM1, GDPD1, GINS1, GPSM2, IGF2BP3, INTS8, IQGAP3, KIF15, KIF20B, KIF2C, KIFC1, KNTC1, KPNA2, LAPTM4B, LLGL2, LSR, MAL2, MCM4, MCM7, MELK, MSH2, MTBP, MYBL2, NCAPG2, NDC80, NEK2, NUP155, PBK, PCNA, POLQ, PRIM1, PSPH, RACGAP1, RAD51AP1, RBL1, RFC3, RFC4, RRM2, SASS6, SHCBP1, SKA1, TIMELESS, TKT, TOP2A, TRIP13, TUBA1B, TUBG1, TYMS, UBE2C, UBE2T, XPO5, XRCC2, ZNF623 | AIF1, SCIMP, CDC37L1, CLEC10A, CSGALNACT1, CTSO, DOCK8, ETS1, GAS7, IL7R, JUNB, NAT2, NFIL3, PDCD1LG2, PECAM1, PMP22, RCAN1 |
| <b>Thai HCC vs. Thai iCCA vs. TCGA_HCC</b> | BRIP1, FLVCR1, MAL2, MCM7, MTBP, SASS6, TIMELESS                                                                                                                                                                                                                                                                                                                                                                                                                                                                                                                                               | SCIMP, NFIL3                                                                                                                |

**Table S4. GSEA result compared HFGC with LFGC of Thai iCCA**

| Biological Process (HFGC)                            |      |        |        |           |           |            |             |                                |
|------------------------------------------------------|------|--------|--------|-----------|-----------|------------|-------------|--------------------------------|
| NAME                                                 | SIZE | ES     | NES    | NOM p-val | FDR q-val | FWER p-val | RANK AT MAX | LEADING EDGE                   |
| DNA_DEPENDENT_DNA_REPLICATION                        | 43   | -0.674 | -1.907 | 0.002     | 0.2221    | 0.122      | 2601        | tags=60%, list=19%, signal=75% |
| MITOSIS                                              | 50   | -0.689 | -1.882 | 0.002     | 0.1576    | 0.166      | 1564        | tags=52%, list=12%, signal=59% |
| M_PHASE_OF_MITOTIC_CELL_CYCLE                        | 53   | -0.685 | -1.861 | 0.002     | 0.1475    | 0.204      | 1564        | tags=51%, list=12%, signal=57% |
| M_PHASE                                              | 70   | -0.664 | -1.855 | 0.004     | 0.1176    | 0.21       | 1855        | tags=53%, list=14%, signal=61% |
| CELL_CYCLE_PHASE                                     | 107  | -0.593 | -1.837 | 0.0079    | 0.1166    | 0.242      | 1564        | tags=42%, list=12%, signal=47% |
| CELL_CYCLE_PROCESS                                   | 124  | -0.601 | -1.834 | 0.0041    | 0.1008    | 0.249      | 1957        | tags=47%, list=15%, signal=54% |
| MITOTIC_CELL_CYCLE                                   | 99   | -0.604 | -1.82  | 0.0081    | 0.1015    | 0.277      | 1766        | tags=43%, list=13%, signal=50% |
| DNA_REPLICATION                                      | 75   | -0.599 | -1.804 | 0.008     | 0.1073    | 0.307      | 2620        | tags=52%, list=19%, signal=64% |
| CHROMOSOME_SEGREGATION                               | 21   | -0.702 | -1.801 | 0.0039    | 0.0981    | 0.309      | 1024        | tags=48%, list=8%, signal=51%  |
| CELL_CYCLE_GO_0007049                                | 215  | -0.505 | -1.799 | 0.0101    | 0.0907    | 0.313      | 2042        | tags=38%, list=15%, signal=44% |
| DNA_INTEGRITY_CHECKPOINT                             | 16   | -0.719 | -1.785 | 0.012     | 0.0955    | 0.34       | 2579        | tags=63%, list=19%, signal=77% |
| REGULATION_OF_MITOSIS                                | 26   | -0.682 | -1.784 | 0.008     | 0.0885    | 0.342      | 1564        | tags=54%, list=12%, signal=61% |
| MICROTUBULE_CYTOSKELETON_ORGANIZATION_AND_BIOGENESIS | 28   | -0.632 | -1.747 | 0.0251    | 0.1188    | 0.431      | 3152        | tags=61%, list=23%, signal=79% |
| MICROTUBULE_BASED_PROCESS                            | 60   | -0.518 | -1.744 | 0.008     | 0.1132    | 0.437      | 3152        | tags=47%, list=23%, signal=61% |
| CHROMATIN_MODIFICATION                               | 39   | -0.571 | -1.731 | 0.0078    | 0.1195    | 0.469      | 3230        | tags=56%, list=24%, signal=74% |
| CHROMOSOME_ORGANIZATION_AND_BIOGENESIS               | 82   | -0.54  | -1.73  | 0.0138    | 0.1138    | 0.471      | 3230        | tags=54%, list=24%, signal=70% |
| CELL_CYCLE_CHECKPOINT_GO_0000075                     | 34   | -0.614 | -1.705 | 0.0356    | 0.1347    | 0.524      | 3112        | tags=59%, list=23%, signal=76% |
| MEIOTIC_CELL_CYCLE                                   | 21   | -0.619 | -1.702 | 0.0149    | 0.1315    | 0.535      | 1855        | tags=52%, list=14%, signal=61% |



| INTERPHASE_OF_MITOTIC_CELL_CYCLE                        | 37   | -0.564 | -1.686 | 0.0163    | 0.1442    | 0.573      | 4206        | tags=62%, list=31%, signal=90% |
|---------------------------------------------------------|------|--------|--------|-----------|-----------|------------|-------------|--------------------------------|
| PHOSPHOINOSITIDE_BIOSYNTHETIC_PROCESS                   | 20   | -0.642 | -1.685 | 0.0187    | 0.1384    | 0.579      | 2275        | tags=50%, list=17%, signal=60% |
| <b>Biological Process (LFGC)</b>                        |      |        |        |           |           |            |             |                                |
| NAME                                                    | SIZE | ES     | NES    | NOM p-val | FDR q-val | FWER p-val | RANK AT MAX | LEADING EDGE                   |
| DEFENSE_RESPONSE                                        | 189  | 0.6299 | 1.8836 | 0.0162    | 0.4864    | 0.174      | 2508        | tags=59%, list=19%, signal=71% |
| RESPONSE_TO_WOUNDING                                    | 142  | 0.6262 | 1.8659 | 0.0081    | 0.2967    | 0.204      | 2839        | tags=61%, list=21%, signal=77% |
| INFLAMMATORY_RESPONSE                                   | 100  | 0.6446 | 1.8588 | 0.0142    | 0.2127    | 0.211      | 2508        | tags=61%, list=19%, signal=74% |
| IMMUNE_RESPONSE                                         | 152  | 0.6352 | 1.8528 | 0.0233    | 0.1687    | 0.221      | 2832        | tags=64%, list=21%, signal=80% |
| IMMUNE_SYSTEM_PROCESS                                   | 219  | 0.5803 | 1.8454 | 0.0307    | 0.147     | 0.231      | 2848        | tags=58%, list=21%, signal=72% |
| POSITIVE_REGULATION_OF_MULTICELLULAR_ORGANISMAL_PROCESS | 42   | 0.6503 | 1.8285 | 0.0101    | 0.1507    | 0.263      | 2949        | tags=60%, list=22%, signal=76% |
| RESPONSE_TO_OTHER_ORGANISM                              | 48   | 0.6462 | 1.8282 | 0.0161    | 0.1298    | 0.263      | 2547        | tags=63%, list=19%, signal=77% |
| CYTOKINE_PRODUCTION                                     | 41   | 0.6209 | 1.7841 | 0.0219    | 0.1792    | 0.362      | 2949        | tags=61%, list=22%, signal=78% |
| POSITIVE_REGULATION_OF_TRANSLATION                      | 21   | 0.6338 | 1.7774 | 0.014     | 0.1697    | 0.376      | 2190        | tags=62%, list=16%, signal=74% |
| LOCOMOTORY_BEHAVIOR                                     | 74   | 0.6033 | 1.7728 | 0.0164    | 0.1596    | 0.386      | 2820        | tags=64%, list=21%, signal=80% |
| RESPONSE_TO_EXTERNAL_STIMULUS                           | 213  | 0.5415 | 1.7694 | 0.0164    | 0.1505    | 0.394      | 2848        | tags=55%, list=21%, signal=69% |
| MULTI_ORGANISM_PROCESS                                  | 97   | 0.5187 | 1.7675 | 0.0182    | 0.1408    | 0.394      | 3121        | tags=55%, list=23%, signal=71% |
| POSITIVE_REGULATION_OF_IMMUNE_SYSTEM_PROCESS            | 32   | 0.652  | 1.7663 | 0.0217    | 0.1321    | 0.397      | 1006        | tags=41%, list=7%, signal=44%  |
| POSITIVE_REGULATION_OF_CYTOKINE_BIOSYNTHETIC_PROCESS    | 15   | 0.7064 | 1.7575 | 0.0164    | 0.1328    | 0.423      | 2190        | tags=67%, list=16%, signal=80% |
| CELLULAR_DEFENSE_RESPONSE                               | 40   | 0.6893 | 1.7565 | 0.0291    | 0.1252    | 0.427      | 1874        | tags=63%, list=14%, signal=72% |
| RESPONSE_TO_BACTERIUM                                   | 15   | 0.7077 | 1.7227 | 0.0163    | 0.1574    | 0.505      | 2488        | tags=67%, list=18%, signal=82% |

|                                             |      |        |        |           |           |            |             |                                 |
|---------------------------------------------|------|--------|--------|-----------|-----------|------------|-------------|---------------------------------|
| REGULATION_OF_IMMUNE_SYSTEM_PROCESS         | 39   | 0.6153 | 1.7226 | 0.0339    | 0.1484    | 0.505      | 2848        | tags=56%, list=21%, signal=71%  |
| POSITIVE_REGULATION_OF_IMMUNE_RESPONSE      | 18   | 0.7265 | 1.7208 | 0.0142    | 0.1422    | 0.511      | 1987        | tags=61%, list=15%, signal=72%  |
| REGULATION_OF_CYTOKINE_BIOSYNTHETIC_PROCESS | 21   | 0.6296 | 1.7202 | 0.0198    | 0.1351    | 0.513      | 2190        | tags=57%, list=16%, signal=68%  |
| RESPONSE_TO_VIRUS                           | 31   | 0.6363 | 1.7147 | 0.0257    | 0.134     | 0.525      | 3695        | tags=81%, list=27%, signal=111% |
| <b>KEGG Pathway (HFGC)</b>                  |      |        |        |           |           |            |             |                                 |
| NAME                                        | SIZE | ES     | NES    | NOM p-val | FDR q-val | FWER p-val | RANK AT MAX | LEADING EDGE                    |
| KEGG_DNA_REPLICATION                        | 29   | -0.812 | -1.86  | 0.0019    | 0.1886    | 0.125      | 969         | tags=72%, list=7%, signal=78%   |
| KEGG_MISMATCH_REPAIR                        | 19   | -0.742 | -1.776 | 0.0059    | 0.2655    | 0.267      | 1688        | tags=63%, list=13%, signal=72%  |
| KEGG_BASE_EXCISION_REPAIR                   | 21   | -0.676 | -1.739 | 0.0077    | 0.2569    | 0.338      | 3359        | tags=71%, list=25%, signal=95%  |
| KEGG_CELL_CYCLE                             | 90   | -0.61  | -1.721 | 0.0211    | 0.2324    | 0.388      | 2306        | tags=52%, list=17%, signal=63%  |
| KEGG_HOMOLOGOUS_RECOMBINATION               | 16   | -0.71  | -1.689 | 0.0134    | 0.2545    | 0.464      | 1855        | tags=63%, list=14%, signal=72%  |
| KEGG_RNA_POLYMERASE                         | 23   | -0.654 | -1.645 | 0.0059    | 0.3047    | 0.555      | 2754        | tags=65%, list=20%, signal=82%  |
| KEGG_OOCYTE_MEIOSIS                         | 77   | -0.488 | -1.616 | 0.0206    | 0.3265    | 0.618      | 2892        | tags=44%, list=21%, signal=56%  |
| KEGG_AMINOACYL_TRANSA_BIOSYNTHESIS          | 30   | -0.625 | -1.601 | 0.0329    | 0.3195    | 0.648      | 3080        | tags=67%, list=23%, signal=86%  |
| KEGG_PYRIMIDINE_METABOLISM                  | 62   | -0.506 | -1.591 | 0.0476    | 0.308     | 0.675      | 3502        | tags=56%, list=26%, signal=76%  |
| KEGG_NUCLEOTIDE_EXCISION_REPAIR             | 34   | -0.571 | -1.588 | 0.0355    | 0.2814    | 0.678      | 3395        | tags=50%, list=25%, signal=67%  |
| KEGG_N_GLYCAN_BIOSYNTHESIS                  | 37   | -0.502 | -1.562 | 0.0462    | 0.3011    | 0.729      | 3637        | tags=62%, list=27%, signal=85%  |
| KEGG_SPLICEOSOME                            | 96   | -0.531 | -1.552 | 0.0825    | 0.2975    | 0.747      | 4748        | tags=68%, list=35%, signal=104% |
| KEGG_BASAL_TRANSCRIPTION_FACTORS            | 24   | -0.564 | -1.548 | 0.0511    | 0.2811    | 0.754      | 933         | tags=33%, list=7%, signal=36%   |
| KEGG_UBIQUITIN_MEDIATED_PROTEOLYSIS         | 105  | -0.455 | -1.542 | 0.0405    | 0.2726    | 0.765      | 3469        | tags=46%, list=26%, signal=61%  |
| KEGG_RNA_DEGRADATION                        | 44   | -0.524 | -1.508 | 0.0807    | 0.312     | 0.815      | 3259        | tags=48%, list=24%,             |

|                                                           |      |        |        |           |           |            |             | signal=63%                      |
|-----------------------------------------------------------|------|--------|--------|-----------|-----------|------------|-------------|---------------------------------|
| KEGG_OXIDATIVE_PHOSPHORYLATION                            | 89   | -0.523 | -1.498 | 0.1       | 0.3092    | 0.826      | 4764        | tags=67%, list=35%, signal=104% |
| KEGG_GLYCOSYLPHOSPHATIDYLINOSITOL_GPI_ANCHOR_BIOSYNTHESIS | 18   | -0.582 | -1.495 | 0.0538    | 0.2962    | 0.829      | 3900        | tags=67%, list=29%, signal=94%  |
| KEGG_HUNTINGTONS_DISEASE                                  | 120  | -0.462 | -1.469 | 0.0904    | 0.3207    | 0.854      | 4145        | tags=52%, list=31%, signal=75%  |
| KEGG_PROGESTERONE_MEDIATED_OOCYTE_MATURATION              | 54   | -0.441 | -1.447 | 0.0696    | 0.3396    | 0.876      | 1134        | tags=28%, list=8%, signal=30%   |
| <b>KEGG Pathway (LFGC)</b>                                |      |        |        |           |           |            |             |                                 |
| NAME                                                      | SIZE | ES     | NES    | NOM p-val | FDR q-val | FWER p-val | RANK AT MAX | LEADING EDGE                    |
| KEGG_HEMATOPOIETIC_CELL_LINEAGE                           | 49   | 0.7264 | 1.8663 | 0.002     | 0.2115    | 0.134      | 1945        | tags=63%, list=14%, signal=74%  |
| KEGG_CYTOKINE_CYTOKINE_RECEPTOR_INTERACTION               | 156  | 0.5901 | 1.8433 | 0.002     | 0.1416    | 0.167      | 3003        | tags=60%, list=22%, signal=77%  |
| KEGG_NATURAL_KILLER_CELL_MEDIATED_CYTOTOXICITY            | 80   | 0.5364 | 1.6603 | 0.0455    | 0.5888    | 0.516      | 1202        | tags=40%, list=9%, signal=44%   |
| KEGG_NEUROACTIVE_LIGAND_RECEPTOR_INTERACTION              | 108  | 0.4393 | 1.6404 | 0.0165    | 0.5135    | 0.557      | 2646        | tags=40%, list=20%, signal=49%  |
| KEGG_CELL_ADHESION_MOLECULES_CAMS                         | 93   | 0.5438 | 1.6371 | 0.052     | 0.4226    | 0.56       | 2500        | tags=49%, list=19%, signal=60%  |
| KEGG_CHEMOKINE_SIGNALING_PATHWAY                          | 142  | 0.458  | 1.5851 | 0.0538    | 0.5215    | 0.668      | 1088        | tags=31%, list=8%, signal=33%   |
| KEGG_B_CELL_RECEPTOR_SIGNALING_PATHWAY                    | 58   | 0.4919 | 1.5708 | 0.0593    | 0.4922    | 0.693      | 1362        | tags=40%, list=10%, signal=44%  |
| KEGG_LEUKOCYTE_TRANSENDOTHELIAL_MIGRATION                 | 76   | 0.4963 | 1.5683 | 0.0641    | 0.4378    | 0.695      | 1611        | tags=38%, list=12%, signal=43%  |
| KEGG_T_CELL_RECEPTOR_SIGNALING_PATHWAY                    | 77   | 0.4747 | 1.567  | 0.0559    | 0.3925    | 0.7        | 1517        | tags=38%, list=11%, signal=42%  |
| KEGG_COMPLEMENT_AND_COAGULATION_CASCADES                  | 59   | 0.734  | 1.5668 | 0.0539    | 0.3536    | 0.701      | 2577        | tags=80%, list=19%, signal=98%  |
| KEGG_JAK_STAT_SIGNALING_PATHWAY                           | 84   | 0.4794 | 1.5541 | 0.0713    | 0.3496    | 0.724      | 2208        | tags=44%, list=16%, signal=52%  |
| KEGG_NOD_LIKE_RECEPTOR_SIGNALING_PATHWAY                  | 48   | 0.5046 | 1.5262 | 0.082     | 0.3787    | 0.756      | 1717        | tags=42%, list=13%, signal=48%  |
| KEGG_INTESTINAL_IMMUNE_NETWORK_FOR_IG                     | 29   | 0.6359 | 1.4996 | 0.1064    | 0.4074    | 0.795      | 4060        | tags=86%, list=30%,             |

|                                             |      |        |        |           |           |            |             |                                |
|---------------------------------------------|------|--------|--------|-----------|-----------|------------|-------------|--------------------------------|
| A_PRODUCTION                                |      |        |        |           |           |            |             | signal=123%                    |
| KEGG_GRAFT_VERSUS_HOST_DISEASE              | 25   | 0.7296 | 1.4963 | 0.0682    | 0.3859    | 0.799      | 2435        | tags=76%, list=18%, signal=93% |
| KEGG_PRIMARY_IMMUNODEFICIENCY               | 26   | 0.6269 | 1.4957 | 0.1086    | 0.361     | 0.8        | 2588        | tags=73%, list=19%, signal=90% |
| KEGG_AUTOIMMUNE_THYROID_DISEASE             | 23   | 0.6945 | 1.4832 | 0.0969    | 0.3616    | 0.817      | 2877        | tags=74%, list=21%, signal=94% |
| KEGG_ARACHIDONIC_ACID_METABOLISM            | 32   | 0.5242 | 1.4747 | 0.1006    | 0.3558    | 0.829      | 3686        | tags=69%, list=27%, signal=94% |
| KEGG_TYPE_II_DIABETES_MELLITUS              | 31   | 0.4034 | 1.4685 | 0.0393    | 0.3455    | 0.833      | 585         | tags=23%, list=4%, signal=24%  |
| KEGG_PRION_DISEASES                         | 29   | 0.5504 | 1.4596 | 0.092     | 0.3433    | 0.842      | 2577        | tags=59%, list=19%, signal=72% |
| KEGG_NICOTINATE_AND_NICOTINAMIDE_METABOLISM | 17   | 0.4906 | 1.4434 | 0.0658    | 0.3543    | 0.856      | 2290        | tags=35%, list=17%, signal=42% |
| <b>Oncogenic (HFGC)</b>                     |      |        |        |           |           |            |             |                                |
| NAME                                        | SIZE | ES     | NES    | NOM p-val | FDR q-val | FWER p-val | RANK AT MAX | LEADING EDGE                   |
| RB_DN.V1_UP                                 | 89   | -0.564 | -1.931 | 0.0039    | 0.0198    | 0.038      | 2798        | tags=52%, list=21%, signal=65% |
| RB_P107_DN.V1_UP                            | 88   | -0.606 | -1.923 | 0.0059    | 0.0108    | 0.041      | 1688        | tags=51%, list=13%, signal=58% |
| PRC2_EZH2_UP.V1_UP                          | 117  | -0.475 | -1.778 | 0.0115    | 0.0513    | 0.181      | 1547        | tags=35%, list=11%, signal=39% |
| RPS14_DN.V1_DN                              | 132  | -0.515 | -1.764 | 0.0213    | 0.0462    | 0.205      | 4011        | tags=59%, list=30%, signal=83% |
| E2F1_UP.V1_UP                               | 123  | -0.517 | -1.757 | 0.0179    | 0.04      | 0.219      | 3182        | tags=51%, list=24%, signal=66% |
| GCNP_SHH_UP_EARLY.V1_UP                     | 115  | -0.447 | -1.653 | 0.0189    | 0.0852    | 0.406      | 2257        | tags=37%, list=17%, signal=45% |
| CSR_LATE_UP.V1_UP                           | 125  | -0.503 | -1.616 | 0.0247    | 0.1003    | 0.478      | 2489        | tags=46%, list=18%, signal=56% |
| RB_P130_DN.V1_UP                            | 78   | -0.418 | -1.616 | 0.0203    | 0.0879    | 0.478      | 2950        | tags=38%, list=22%, signal=49% |
| PRC2_EDD_UP.V1_UP                           | 110  | -0.443 | -1.564 | 0.0506    | 0.1202    | 0.581      | 2160        | tags=34%, list=16%, signal=40% |
| HOXA9_DN.V1_DN                              | 135  | -0.406 | -1.535 | 0.0503    | 0.1341    | 0.629      | 2943        | tags=38%, list=22%, signal=48% |
| VEGF_A_UP.V1_DN                             | 147  | -0.399 | -1.447 | 0.1016    | 0.2237    | 0.764      | 2360        | tags=33%, list=18%, signal=39% |

|                           |          |        |        |              |              |                    |                    |                                      |
|---------------------------|----------|--------|--------|--------------|--------------|--------------------|--------------------|--------------------------------------|
| E2F3_UP.V1_UP             | 105      | -0.355 | -1.407 | 0.091<br>1   | 0.258        | 0.81               | 1986               | tags=28%,<br>list=15%,<br>signal=32% |
| SIRNA_EIF4GI_UP           | 73       | -0.403 | -1.405 | 0.102<br>3   | 0.241<br>2   | 0.812              | 3063               | tags=45%,<br>list=23%,<br>signal=58% |
| GCNP_SHH_UP_LATE.V1_UP    | 128      | -0.371 | -1.398 | 0.121<br>2   | 0.234        | 0.822              | 3118               | tags=39%,<br>list=23%,<br>signal=50% |
| EGFR_UP.V1_DN             | 135      | -0.323 | -1.391 | 0.058<br>8   | 0.226<br>7   | 0.826              | 3102               | tags=33%,<br>list=23%,<br>signal=43% |
| TBK1.DN.48HRS_UP          | 39       | -0.403 | -1.341 | 0.104<br>4   | 0.282<br>1   | 0.891              | 2892               | tags=38%,<br>list=21%,<br>signal=49% |
| TBK1.DF_DN                | 228      | -0.337 | -1.34  | 0.144<br>5   | 0.266<br>1   | 0.891              | 4018               | tags=41%,<br>list=30%,<br>signal=57% |
| MYC_UP.V1_UP              | 105      | -0.403 | -1.321 | 0.189<br>9   | 0.277<br>5   | 0.91               | 2375               | tags=33%,<br>list=18%,<br>signal=40% |
| EIF4E_UP                  | 54       | -0.391 | -1.288 | 0.190<br>8   | 0.311<br>1   | 0.933              | 3506               | tags=46%,<br>list=26%,<br>signal=62% |
| RB_P107_DN.V1_DN          | 94       | -0.339 | -1.243 | 0.187<br>9   | 0.365<br>8   | 0.955              | 3218               | tags=36%,<br>list=24%,<br>signal=47% |
| <b>Oncogenic (LFGC)</b>   |          |        |        |              |              |                    |                    |                                      |
| NAME                      | SIZ<br>E | ES     | NES    | NOM<br>p-val | FDR<br>q-val | FWE<br>R p-<br>val | RAN<br>K AT<br>MAX | LEADING<br>EDGE                      |
| P53_DN.V2_UP              | 79       | 0.5704 | 1.9195 | 0            | 0.102        | 0.048              | 2412               | tags=44%,<br>list=18%,<br>signal=54% |
| RPS14_DN.V1_UP            | 142      | 0.6025 | 1.8577 | 0.008<br>1   | 0.100<br>9   | 0.09               | 2491               | tags=54%,<br>list=18%,<br>signal=66% |
| EGFR_UP.V1_UP             | 152      | 0.5307 | 1.8076 | 0.014        | 0.123<br>8   | 0.143              | 2685               | tags=45%,<br>list=20%,<br>signal=55% |
| P53_DN.V1_DN              | 133      | 0.5355 | 1.7705 | 0.010<br>1   | 0.134<br>6   | 0.192              | 2926               | tags=52%,<br>list=22%,<br>signal=66% |
| RELA_DN.V1_UP             | 91       | 0.4621 | 1.7161 | 0.014<br>1   | 0.183<br>8   | 0.29               | 2402               | tags=38%,<br>list=18%,<br>signal=46% |
| KRAS.PROSTATE_UP.V1_UP    | 71       | 0.5174 | 1.6938 | 0.014<br>5   | 0.184<br>2   | 0.334              | 3189               | tags=58%,<br>list=24%,<br>signal=75% |
| HOXA9_DN.V1_UP            | 147      | 0.5021 | 1.6755 | 0.039        | 0.184<br>8   | 0.369              | 1942               | tags=37%,<br>list=14%,<br>signal=42% |
| KRAS.LUNG.BREAST_UP.V1_UP | 88       | 0.4688 | 1.6688 | 0.012        | 0.170<br>9   | 0.379              | 2890               | tags=43%,<br>list=21%,<br>signal=55% |
| PTEN_DN.V2_UP             | 94       | 0.4766 | 1.6472 | 0.026<br>1   | 0.182<br>7   | 0.416              | 2132               | tags=40%,<br>list=16%,<br>signal=48% |
| PTEN_DN.V1_DN             | 96       | 0.4537 | 1.6429 | 0.020        | 0.171        | 0.424              | 3254               | tags=49%,                            |

|                      |     |        |        |            |            |       |      |                                      |
|----------------------|-----|--------|--------|------------|------------|-------|------|--------------------------------------|
|                      |     |        |        | 4          | 4          |       |      | list=24%,<br>signal=64%              |
| ATM_DN.V1_UP         | 79  | 0.4708 | 1.6424 | 0.020<br>4 | 0.156<br>3 | 0.425 | 3473 | tags=51%,<br>list=26%,<br>signal=68% |
| STK33_NOMO_UP        | 227 | 0.4533 | 1.6374 | 0.045<br>6 | 0.148<br>7 | 0.435 | 2294 | tags=39%,<br>list=17%,<br>signal=46% |
| STK33_UP             | 225 | 0.4324 | 1.6319 | 0.050<br>4 | 0.144      | 0.445 | 2417 | tags=41%,<br>list=18%,<br>signal=49% |
| KRAS.BREAST_UP.V1_UP | 71  | 0.4614 | 1.6316 | 0.032<br>8 | 0.134<br>3 | 0.447 | 3579 | tags=48%,<br>list=27%,<br>signal=65% |
| KRAS.LUNG_UP.V1_UP   | 81  | 0.4791 | 1.6239 | 0.020<br>7 | 0.131<br>8 | 0.459 | 2890 | tags=47%,<br>list=21%,<br>signal=59% |
| CRX_DN.V1_DN         | 86  | 0.4552 | 1.623  | 0.023<br>5 | 0.124      | 0.46  | 1958 | tags=34%,<br>list=15%,<br>signal=39% |
| HINATA_NFKB_IMMUNIF  | 16  | 0.7641 | 1.6149 | 0.029<br>6 | 0.124<br>9 | 0.475 | 2133 | tags=81%,<br>list=16%,<br>signal=96% |
| IL2_UP.V1_DN         | 114 | 0.3958 | 1.6109 | 0.006<br>5 | 0.122      | 0.486 | 2989 | tags=38%,<br>list=22%,<br>signal=48% |
| STK33_SKM_UP         | 214 | 0.4085 | 1.6005 | 0.059<br>3 | 0.125<br>6 | 0.507 | 2417 | tags=40%,<br>list=18%,<br>signal=48% |
| KRAS.BREAST_UP.V1_DN | 74  | 0.452  | 1.5994 | 0.016<br>6 | 0.120<br>3 | 0.508 | 2493 | tags=38%,<br>list=18%,<br>signal=46% |

**Table S5. GSEA result compared HFGC with LFGC of Thai HCC**

| <b>Biological Process (HFGC)</b>      |      |          |          |           |           |            |             |                                |
|---------------------------------------|------|----------|----------|-----------|-----------|------------|-------------|--------------------------------|
| NAME                                  | SIZE | ES       | NES      | NOM p-val | FDR q-val | FWER p-val | RANK AT MAX | LEADING EDGE                   |
| DNA_DEPENDENT_DNA_REPLICATION         | 40   | -0.62918 | -1.76602 | 0.022133  | 1         | 0.379      | 2617        | tags=52%, list=19%, signal=65% |
| GOLGI_VESICLE_TRANSPORT               | 33   | -0.56013 | -1.71775 | 0.008621  | 0.912368  | 0.504      | 2368        | tags=39%, list=17%, signal=48% |
| CHROMOSOME_SEGREGATION                | 21   | -0.63975 | -1.63112 | 0.059305  | 1         | 0.709      | 2362        | tags=62%, list=17%, signal=75% |
| DNA_REPLICATION                       | 70   | -0.53649 | -1.61436 | 0.056112  | 1         | 0.744      | 2617        | tags=46%, list=19%, signal=56% |
| CHROMATIN_REMODELING                  | 18   | -0.63872 | -1.61236 | 0.034205  | 0.932113  | 0.745      | 2705        | tags=56%, list=20%, signal=69% |
| REGULATION_OF_DNA_REPLICATION         | 15   | -0.61605 | -1.54532 | 0.056112  | 1         | 0.839      | 1571        | tags=47%, list=12%, signal=53% |
| DNA_PACKAGING                         | 23   | -0.55972 | -1.52803 | 0.079051  | 1         | 0.86       | 2852        | tags=52%, list=21%, signal=66% |
| LIPOPROTEIN_BIOSYNTHETIC_PROCESS      | 20   | -0.54358 | -1.52769 | 0.065764  | 1         | 0.861      | 2499        | tags=40%, list=18%, signal=49% |
| PHOSPHOINOSITIDE_METABOLIC_PROCESS    | 25   | -0.49369 | -1.47285 | 0.089796  | 1         | 0.905      | 2499        | tags=40%, list=18%, signal=49% |
| SECRETORY_PATHWAY                     | 53   | -0.42492 | -1.4727  | 0.048583  | 1         | 0.905      | 2368        | tags=36%, list=17%, signal=43% |
| LIPID_BIOSYNTHETIC_PROCESS            | 68   | -0.38891 | -1.45206 | 0.069364  | 1         | 0.919      | 2499        | tags=32%, list=18%, signal=39% |
| GLYCEROPHOSPHOLIPID_METABOLIC_PROCESS | 34   | -0.45017 | -1.44896 | 0.086242  | 1         | 0.921      | 2499        | tags=38%, list=18%, signal=47% |
| DNA_METABOLIC_PROCESS                 | 169  | -0.42659 | -1.44562 | 0.125514  | 1         | 0.924      | 3189        | tags=44%, list=23%, signal=56% |
| DNA_REPAIR                            | 83   | -0.44888 | -1.43731 | 0.122407  | 1         | 0.93       | 3085        | tags=46%, list=23%, signal=59% |
| PROTEIN_DNA_COMPLEX_ASSEMBLY          | 35   | -0.47914 | -1.42807 | 0.124744  | 1         | 0.938      | 2625        | tags=43%, list=19%, signal=53% |
| REGULATION_OF_MITOSIS                 | 26   | -0.53891 | -1.42042 | 0.149901  | 1         | 0.943      | 2596        | tags=54%, list=19%, signal=66% |
| M_PHASE                               | 71   | -0.49874 | -1.41633 | 0.174699  | 0.979201  | 0.947      | 3072        | tags=54%, list=23%, signal=69% |
| TRANSCRIPTION_INITIATION              | 23   | -0.5176  | -1.41132 | 0.108932  | 0.94973   | 0.95       | 1757        | tags=39%, list=13%, signal=45% |
| DOUBLE_STRAND_BREAK_REPAIR            | 18   | -0.50342 | -1.39604 | 0.114345  | 0.978372  | 0.956      | 1558        | tags=39%, list=11%, signal=44% |
| MRNA_PROCESSING_GO_0006397            | 50   | -0.47793 | -1.37971 | 0.153684  | 1         | 0.966      | 2536        | tags=48%, list=19%, signal=59% |
| <b>Biological Process (LFGC)</b>      |      |          |          |           |           |            |             |                                |
| NAME                                  | SIZE | ES       | NES      | NOM p-val | FDR q-val | FWER p-val | RANK AT MAX | LEADING EDGE                   |
| IMMUNE_RESPONSE                       | 145  | 0.61873  | 1.97102  | 0.004     | 0.09      | 0.063      | 2401        | tags=56%, list=18%,            |

|                                                                   |      |          |          |           |          |          |      |                                |
|-------------------------------------------------------------------|------|----------|----------|-----------|----------|----------|------|--------------------------------|
|                                                                   |      |          | 4        | 283       | 9877     |          |      | signal=67%                     |
| DEFENSE_RESPONSE                                                  | 173  | 0.571424 | 1.936295 | 0.008869  | 0.082701 | 0.088    | 2461 | tags=51%, list=18%, signal=61% |
| IMMUNE_SYSTEM_PROCESS                                             | 207  | 0.576359 | 1.8863   | 0.008811  | 0.11421  | 0.152    | 2401 | tags=52%, list=18%, signal=62% |
| CYCLIC_NUCLEOTIDE_MEDIATED_SIGNALING                              | 43   | 0.538298 | 1.886154 | 0         | 0.08635  | 0.154    | 1277 | tags=40%, list=9%, signal=43%  |
| G_PROTEIN_SIGNALING_COUPLED_TO_CYCLIC_NUCLEOTIDE_SECOND_MESSENGER | 42   | 0.540901 | 1.846746 | 0.007444  | 0.112183 | 0.217    | 1277 | tags=40%, list=9%, signal=45%  |
| REGULATION_OF_PROTEIN_AMINO_ACID_PHOSPHORYLATION                  | 18   | 0.65502  | 1.839378 | 0         | 0.10229  | 0.23     | 1422 | tags=44%, list=10%, signal=50% |
| RESPONSE_TO_OTHER_ORGANISM                                        | 37   | 0.633649 | 1.831636 | 0.006637  | 0.09651  | 0.243    | 2458 | tags=57%, list=18%, signal=69% |
| MULTI_ORGANISM_PROCESS                                            | 77   | 0.505827 | 1.830873 | 0.006494  | 0.085133 | 0.246    | 2699 | tags=47%, list=20%, signal=58% |
| CELLULAR_DEFENSE_RESPONSE                                         | 38   | 0.667433 | 1.82391  | 0.013667  | 0.083166 | 0.265    | 1947 | tags=55%, list=14%, signal=64% |
| CAMP_MEDIATED_SIGNALING                                           | 29   | 0.567475 | 1.821902 | 0         | 0.076653 | 0.268    | 2709 | tags=55%, list=20%, signal=69% |
| BEHAVIOR                                                          | 84   | 0.527808 | 1.820751 | 0.013699  | 0.070419 | 0.268    | 2395 | tags=46%, list=18%, signal=56% |
| LOCOMOTORY_BEHAVIOR                                               | 64   | 0.595132 | 1.808114 | 0.013393  | 0.073622 | 0.298    | 2395 | tags=56%, list=18%, signal=68% |
| G_PROTEIN_SIGNALING_COUPLED_TO_CAMP_NUCLEOTIDE_SECOND_MESSENGER   | 28   | 0.572484 | 1.791727 | 0.002353  | 0.081384 | 0.33     | 2709 | tags=57%, list=20%, signal=71% |
| JAK_STAT_CASCADE                                                  | 22   | 0.614424 | 1.790257 | 0.007737  | 0.077138 | 0.332    | 2370 | tags=55%, list=17%, signal=66% |
| POSITIVE_REGULATION_OF_MULTICELLULAR_ORGANISMAL_PROCESS           | 39   | 0.55981  | 1.78999  | 0.01073   | 0.072088 | 0.332    | 2401 | tags=49%, list=18%, signal=59% |
| IMMUNE_EFFECTOR_PROCESS                                           | 23   | 0.648251 | 1.78198  | 0.008     | 0.073971 | 0.348    | 1376 | tags=57%, list=10%, signal=63% |
| SECOND_MESSENGER_MEDIATED_SIGNALING                               | 74   | 0.478572 | 1.759456 | 0.007177  | 0.088508 | 0.403    | 1277 | tags=31%, list=9%, signal=34%  |
| INFLAMMATORY_RESPONSE                                             | 90   | 0.536287 | 1.749392 | 0.027837  | 0.09205  | 0.418    | 1608 | tags=39%, list=12%, signal=44% |
| PEPTIDYL_TYROSINE_PHOSPHORYLATION                                 | 19   | 0.662132 | 1.74779  | 0.01227   | 0.088396 | 0.42     | 2370 | tags=47%, list=17%, signal=57% |
| REGULATION_OF_IMMUNE_SYSTEM_PROCESSES                             | 39   | 0.561961 | 1.72683  | 0.02766   | 0.10236  | 0.472    | 2401 | tags=51%, list=18%, signal=62% |
| <b>KEGG Pathway (HFGC)</b>                                        |      |          |          |           |          |          |      |                                |
| NAME                                                              | SIZE | ES       | NES      | NOM p-val | FDR q-   | FWE R p- | RANK | LEADING EDGE                   |



|                                                           |    |          |          |          | val      | val   | AT<br>MA<br>X |                                 |
|-----------------------------------------------------------|----|----------|----------|----------|----------|-------|---------------|---------------------------------|
| KEGG_GLYCOSYLPHOSPHATIDYLINOSITOL_GPI_ANCHOR_BIOSYNTHESIS | 17 | -0.6601  | -1.68827 | 0.013699 | 0.913268 | 0.488 | 2499          | tags=53%, list=18%, signal=65%  |
| KEGG_MISMATCH_REPAIR                                      | 20 | -0.67839 | -1.6523  | 0.030675 | 0.623505 | 0.557 | 3127          | tags=65%, list=23%, signal=84%  |
| KEGG_DNA_REPLICATION                                      | 30 | -0.69259 | -1.58928 | 0.061475 | 0.683482 | 0.697 | 1140          | tags=53%, list=8%, signal=58%   |
| KEGG_N_GLYCAN_BIOSYNTHESIS                                | 35 | -0.478   | -1.51036 | 0.0625   | 0.854995 | 0.814 | 3252          | tags=51%, list=24%, signal=67%  |
| KEGG_PROTEIN_EXPORT                                       | 21 | -0.54417 | -1.4696  | 0.092    | 0.860041 | 0.86  | 3078          | tags=52%, list=23%, signal=68%  |
| KEGG_NUCLEOTIDE_EXCISION_REPAIR                           | 36 | -0.49862 | -1.43636 | 0.128846 | 0.861759 | 0.895 | 3127          | tags=47%, list=23%, signal=61%  |
| KEGG_BASE_EXCISION_REPAIR                                 | 23 | -0.53646 | -1.41653 | 0.124498 | 0.817245 | 0.904 | 3127          | tags=61%, list=23%, signal=79%  |
| KEGG_THYROID_CANCER                                       | 21 | -0.44684 | -1.35522 | 0.112936 | 0.94311  | 0.941 | 4477          | tags=67%, list=33%, signal=99%  |
| KEGG_CELL_CYCLE                                           | 92 | -0.46083 | -1.35385 | 0.196787 | 0.843535 | 0.941 | 1726          | tags=41%, list=13%, signal=47%  |
| KEGG_HOMOLOGOUS_RECOMBINATION                             | 17 | -0.56311 | -1.32721 | 0.182    | 0.848409 | 0.96  | 3127          | tags=47%, list=23%, signal=61%  |
| KEGG_SPLICEOSOME                                          | 95 | -0.45813 | -1.31074 | 0.216216 | 0.825949 | 0.968 | 3377          | tags=45%, list=25%, signal=60%  |
| KEGG_PYRIMIDINE_METABOLISM                                | 65 | -0.3794  | -1.22892 | 0.249012 | 1        | 0.994 | 3208          | tags=38%, list=24%, signal=50%  |
| KEGG_AMINOACYL_TRNA_BIOSYNTHESIS                          | 32 | -0.44189 | -1.2235  | 0.2818   | 0.959943 | 0.995 | 4371          | tags=56%, list=32%, signal=83%  |
| KEGG_PROGESTERONE_MEDIATED_OOCYTE_MATURATION              | 54 | -0.3868  | -1.2147  | 0.276423 | 0.916797 | 0.995 | 2871          | tags=46%, list=21%, signal=58%  |
| KEGG_BIOSYNTHESIS_OF_UNSATURATED_FATTY_ACIDS              | 17 | -0.4515  | -1.20649 | 0.27821  | 0.878629 | 0.995 | 4881          | tags=71%, list=36%, signal=110% |
| KEGG_BASAL_TRANSCRIPTION_FACTORS                          | 25 | -0.40496 | -1.17575 | 0.26839  | 0.912466 | 0.998 | 2431          | tags=44%, list=18%, signal=53%  |
| KEGG_LYSINE_DEGRADATION                                   | 30 | -0.40296 | -1.1726  | 0.278    | 0.866963 | 0.998 | 3032          | tags=40%, list=22%, signal=51%  |
| KEGG_RNA_POLYMERASE                                       | 23 | -0.44177 | -1.16567 | 0.305785 | 0.836076 | 0.998 | 3208          | tags=43%, list=24%, signal=57%  |
| KEGG_ADHERENS_JUNCTION                                    | 55 | -0.33143 | -1.10704 | 0.324268 | 0.939998 | 1     | 1869          | tags=27%, list=14%, signal=31%  |
| KEGG_OOCYTE_MEIOSIS                                       | 75 | -0.33657 | -1.09607 | 0.376426 | 0.91905  | 1     | 2886          | tags=35%, list=21%, signal=44%  |

|                                                   |      |          |          |           | 3         |            |             |                                 |
|---------------------------------------------------|------|----------|----------|-----------|-----------|------------|-------------|---------------------------------|
| KEGG Pathway (LFGC)                               |      |          |          |           |           |            |             |                                 |
| NAME                                              | SIZE | ES       | NES      | NOM p-val | FDR q-val | FWER p-val | RANK AT MAX | LEADING EDGE                    |
| KEGG_HEMATOPOIETIC_CELL_LINEAGE                   | 47   | 0.704545 | 2.007128 | 0.00655   | 0.054984  | 0.027      | 1584        | tags=53%, list=12%, signal=60%  |
| KEGG_CYTOKINE_CYTOKINE_RECEPTOR_INTERACTION       | 139  | 0.561605 | 1.909341 | 0.009302  | 0.103436  | 0.104      | 2512        | tags=50%, list=18%, signal=60%  |
| KEGG_JAK_STAT_SIGNALING_PATHWAY                   | 81   | 0.548258 | 1.882923 | 0.010438  | 0.094065  | 0.136      | 1689        | tags=42%, list=12%, signal=48%  |
| KEGG_INTESTINAL_IMMUNE_NETWORK_FOR_IGA_PRODUCTION | 27   | 0.734203 | 1.830915 | 0.00655   | 0.132395  | 0.201      | 2957        | tags=78%, list=22%, signal=99%  |
| KEGG_PRION_DISEASES                               | 30   | 0.602044 | 1.797722 | 0.008421  | 0.145171  | 0.259      | 2395        | tags=50%, list=18%, signal=61%  |
| KEGG_CHEMOKINE_SIGNALING_PATHWAY                  | 132  | 0.509207 | 1.776465 | 0.029787  | 0.148752  | 0.3        | 1422        | tags=36%, list=10%, signal=39%  |
| KEGG_LEISHMANIA_INFECTIO                          | 47   | 0.652137 | 1.775539 | 0.02079   | 0.129828  | 0.305      | 2981        | tags=68%, list=22%, signal=87%  |
| KEGG_NATURAL_KILLER_CELL_MEDIATED_CYTOTOXICITY    | 75   | 0.567174 | 1.768625 | 0.039014  | 0.12248   | 0.318      | 2461        | tags=49%, list=18%, signal=60%  |
| KEGG_CALCIIUM_SIGNALING_PATHWAY                   | 93   | 0.457141 | 1.748602 | 0.009153  | 0.132013  | 0.367      | 3143        | tags=44%, list=23%, signal=57%  |
| KEGG_TOLL_LIKE_RECEPTOR_SIGNALING_PATHWAY         | 63   | 0.525927 | 1.713769 | 0.030675  | 0.161496  | 0.423      | 1631        | tags=40%, list=12%, signal=45%  |
| KEGG_CELL_ADHESION_MOLECULES_CAMS                 | 94   | 0.515669 | 1.71064  | 0.037946  | 0.151088  | 0.435      | 2493        | tags=48%, list=18%, signal=58%  |
| KEGG_TYPE_I_DIABETES_MELLITUS                     | 25   | 0.675559 | 1.680333 | 0.036797  | 0.176451  | 0.488      | 3079        | tags=72%, list=23%, signal=93%  |
| KEGG_GRAFT_VERSUS_HOST_DISEASE                    | 24   | 0.746227 | 1.672133 | 0.044681  | 0.173156  | 0.501      | 2493        | tags=79%, list=18%, signal=97%  |
| KEGG_NEUROACTIVE_LIGAND_RECEPTOR_INTERACTION      | 107  | 0.434694 | 1.658422 | 0.005115  | 0.177866  | 0.53       | 2111        | tags=36%, list=15%, signal=43%  |
| KEGG_PRIMARY_IMMUNODEFICIENCY                     | 24   | 0.675547 | 1.627136 | 0.048523  | 0.211331  | 0.59       | 1938        | tags=63%, list=14%, signal=73%  |
| KEGG_B_CELL_RECEPTOR_SIGNALING_PATHWAY            | 55   | 0.519313 | 1.609815 | 0.067762  | 0.225019  | 0.629      | 1631        | tags=40%, list=12%, signal=45%  |
| KEGG_ALLOGRAFT_REJECTION                          | 20   | 0.745882 | 1.606325 | 0.046512  | 0.217333  | 0.633      | 3079        | tags=90%, list=23%, signal=116% |
| KEGG_AUTOIMMUNE_THYROID_DISEASE                   | 22   | 0.70187  | 1.59605  | 0.060606  | 0.220174  | 0.654      | 3079        | tags=82%, list=23%, signal=106% |

|                                           |      |          |          |           |           |            |             |                                |
|-------------------------------------------|------|----------|----------|-----------|-----------|------------|-------------|--------------------------------|
| KEGG_LEUKOCYTE_TRANSENDOTHELIAL_MIGRATION | 77   | 0.45788  | 1.586102 | 0.072581  | 0.223359  | 0.68       | 2254        | tags=40%, list=17%, signal=48% |
| KEGG_APOPTOSIS                            | 62   | 0.467115 | 1.554045 | 0.05157   | 0.261476  | 0.728      | 3053        | tags=45%, list=22%, signal=58% |
| <b>Oncogenic (HFGC)</b>                   |      |          |          |           |           |            |             |                                |
| NAME                                      | SIZE | ES       | NES      | NOM p-val | FDR q-val | FWER p-val | RANK AT MAX | LEADING EDGE                   |
| GCNP_SHH_UP_EARLY.V1_UP                   | 112  | -0.44558 | -1.61302 | 0.022945  | 0.570273  | 0.455      | 2893        | tags=47%, list=21%, signal=60% |
| RB_P107_DN.V1_UP                          | 94   | -0.52063 | -1.57264 | 0.081439  | 0.395183  | 0.518      | 2187        | tags=47%, list=16%, signal=55% |
| RB_DN.V1_UP                               | 91   | -0.46223 | -1.53291 | 0.055985  | 0.351861  | 0.583      | 3121        | tags=45%, list=23%, signal=58% |
| RPS14_DN.V1_DN                            | 128  | -0.43877 | -1.51859 | 0.066288  | 0.2904    | 0.609      | 2817        | tags=41%, list=21%, signal=52% |
| HOXA9_DN.V1_DN                            | 131  | -0.39457 | -1.49063 | 0.052632  | 0.280516  | 0.67       | 1376        | tags=24%, list=10%, signal=27% |
| RB_P130_DN.V1_UP                          | 73   | -0.40246 | -1.44796 | 0.06203   | 0.305194  | 0.726      | 3345        | tags=42%, list=25%, signal=56% |
| GCNP_SHH_UP_LATE.V1_UP                    | 128  | -0.38965 | -1.42891 | 0.093458  | 0.294296  | 0.747      | 2842        | tags=43%, list=21%, signal=54% |
| YAP1_DN                                   | 24   | -0.43614 | -1.38845 | 0.108987  | 0.325464  | 0.791      | 1761        | tags=33%, list=13%, signal=38% |
| SRC_UP.V1_DN                              | 105  | -0.34118 | -1.31503 | 0.109185  | 0.428184  | 0.869      | 3483        | tags=41%, list=26%, signal=55% |
| MTOR_UP.V1_UP                             | 107  | -0.33723 | -1.30871 | 0.155009  | 0.399462  | 0.885      | 2733        | tags=34%, list=20%, signal=42% |
| E2F3_UP.V1_UP                             | 102  | -0.3626  | -1.30344 | 0.166963  | 0.373698  | 0.888      | 3872        | tags=45%, list=28%, signal=63% |
| PRC2_EZH2_UP.V1_UP                        | 109  | -0.36104 | -1.29241 | 0.179487  | 0.362678  | 0.9        | 2825        | tags=38%, list=21%, signal=47% |
| MYC_UP.V1_UP                              | 106  | -0.34623 | -1.28213 | 0.174147  | 0.352583  | 0.908      | 3044        | tags=35%, list=22%, signal=45% |
| E2F1_UP.V1_UP                             | 119  | -0.37075 | -1.21113 | 0.30916   | 0.458367  | 0.953      | 3075        | tags=41%, list=23%, signal=53% |
| CSR_LATE_UP.V1_UP                         | 125  | -0.37744 | -1.20792 | 0.306569  | 0.433931  | 0.954      | 3417        | tags=42%, list=25%, signal=56% |
| EGFR_UP.V1_DN                             | 136  | -0.29014 | -1.19597 | 0.196     | 0.430325  | 0.959      | 2466        | tags=26%, list=18%, signal=31% |
| AKT_UP_MTOR_DN.V1_DN                      | 117  | -0.2773  | -1.11006 | 0.307692  | 0.57449   | 0.979      | 2660        | tags=27%, list=20%, signal=34% |

|                         |      |          |          |           | 9         |            |             |                                |
|-------------------------|------|----------|----------|-----------|-----------|------------|-------------|--------------------------------|
| GLI1_UP.V1_DN           | 23   | -0.38021 | -1.07906 | 0.381481  | 0.613293  | 0.983      | 2637        | tags=35%, list=19%, signal=43% |
| VEGF_A_UP.V1_DN         | 145  | -0.29105 | -1.05405 | 0.385338  | 0.637762  | 0.987      | 3072        | tags=34%, list=23%, signal=43% |
| TBK1.DN.48HRS_UP        | 37   | -0.32568 | -1.04908 | 0.412863  | 0.617005  | 0.988      | 4923        | tags=57%, list=36%, signal=89% |
| <b>Oncogenic (LFGC)</b> |      |          |          |           |           |            |             |                                |
| NAME                    | SIZE | ES       | NES      | NOM p-val | FDR q-val | FWER p-val | RANK AT MAX | LEADING EDGE                   |
| P53_DN.V1_DN            | 132  | 0.498719 | 1.865869 | 0         | 0.146619  | 0.072      | 2879        | tags=48%, list=21%, signal=60% |
| PTEN_DN.V2_UP           | 94   | 0.478087 | 1.825921 | 0         | 0.122728  | 0.104      | 2384        | tags=40%, list=17%, signal=49% |
| HOXA9_DN.V1_UP          | 145  | 0.532434 | 1.818311 | 0.004107  | 0.086655  | 0.11       | 3358        | tags=52%, list=25%, signal=69% |
| STK33_NOMO_UP           | 225  | 0.491031 | 1.809651 | 0.010395  | 0.073094  | 0.118      | 3463        | tags=52%, list=25%, signal=68% |
| RPS14_DN.V1_UP          | 136  | 0.581069 | 1.798718 | 0.014675  | 0.06671   | 0.13       | 2856        | tags=57%, list=21%, signal=71% |
| RELA_DN.V1_UP           | 86   | 0.457427 | 1.758811 | 0.002141  | 0.088525  | 0.176      | 2304        | tags=41%, list=17%, signal=49% |
| STK33_SKM_UP            | 211  | 0.475827 | 1.739224 | 0.012793  | 0.091894  | 0.205      | 2843        | tags=47%, list=21%, signal=58% |
| EGFR_UP.V1_UP           | 149  | 0.473234 | 1.737659 | 0.010417  | 0.082116  | 0.208      | 2460        | tags=41%, list=18%, signal=49% |
| STK33_UP                | 221  | 0.473561 | 1.731673 | 0.02079   | 0.0773    | 0.216      | 2577        | tags=42%, list=19%, signal=51% |
| KRAS.LUNG_UP.V1_UP      | 74   | 0.461387 | 1.71326  | 0.006682  | 0.083486  | 0.241      | 3118        | tags=42%, list=23%, signal=54% |
| VEGF_A_UP.V1_UP         | 99   | 0.445195 | 1.704662 | 0.008403  | 0.082356  | 0.26       | 2205        | tags=34%, list=16%, signal=41% |
| P53_DN.V2_UP            | 73   | 0.501725 | 1.699962 | 0.025229  | 0.079479  | 0.272      | 2736        | tags=45%, list=20%, signal=56% |
| LEF1_UP.V1_UP           | 109  | 0.475131 | 1.698026 | 0.008949  | 0.075302  | 0.275      | 2520        | tags=41%, list=18%, signal=50% |
| MEL18_DN.V1_DN          | 99   | 0.454059 | 1.687313 | 0.008333  | 0.078173  | 0.289      | 2586        | tags=41%, list=19%, signal=51% |
| IL2_UP.V1_UP            | 118  | 0.43754  | 1.622774 | 0.025114  | 0.130928  | 0.403      | 2605        | tags=37%, list=19%, signal=46% |
| BCAT_GDS748_UP          | 35   | 0.46845  | 1.60452  | 0.020     | 0.14      | 0.442      | 1610        | tags=29%, list=12%,            |

|                        |     |              |              |              |                  |       |      |                                   |
|------------------------|-----|--------------|--------------|--------------|------------------|-------|------|-----------------------------------|
|                        |     |              |              | 325          | 197<br>4         |       |      | signal=32%                        |
| KRAS.BREAST_UP.V1_UP   | 68  | 0.45164      | 1.60253<br>1 | 0.043<br>373 | 0.13<br>565<br>1 | 0.443 | 2676 | tags=41%, list=20%,<br>signal=51% |
| PTEN_DN.V1_UP          | 103 | 0.39776<br>4 | 1.60025<br>6 | 0.019<br>093 | 0.12<br>977<br>9 | 0.445 | 2812 | tags=38%, list=21%,<br>signal=47% |
| BMI1_DN_MEL18_DN.V1_DN | 98  | 0.41994<br>3 | 1.58354<br>6 | 0.024<br>59  | 0.13<br>773<br>4 | 0.471 | 2432 | tags=37%, list=18%,<br>signal=44% |
| BMI1_DN.V1_DN          | 87  | 0.38760<br>4 | 1.55729      | 0.018<br>908 | 0.15<br>855<br>6 | 0.526 | 2472 | tags=33%, list=18%,<br>signal=40% |

**Table S6. GSEA result compared HFGC with LFGC of TCGA HCC**

| Biological Process (HFGC)                |      |            |            |                      |                   |                    |                           |                                          |
|------------------------------------------|------|------------|------------|----------------------|-------------------|--------------------|---------------------------|------------------------------------------|
| NAME                                     | SIZE | ES         | NES        | NO<br>M<br>p-<br>val | FDR<br>q-<br>val  | FWE<br>R p-<br>val | RA<br>NK<br>AT<br>MA<br>X | LEADING<br>EDGE                          |
| CHROMOSOME_SEGREGATION                   | 29   | -0.7256807 | -2.1769378 | 0.00<br>211<br>42    | 0.01<br>085<br>05 | 0.005              | 509                       | tags=45%,<br>list=3%,<br>signal=46<br>%  |
| M_PHASE                                  | 101  | -0.6577637 | -2.1104443 | 0.00<br>398<br>41    | 0.01<br>598<br>17 | 0.015              | 251<br>7                  | tags=49%,<br>list=15%,<br>signal=57<br>% |
| DNA_DEPENDENT_DNA_REPLICATION            | 51   | -0.6878951 | -2.1082685 | 0                    | 0.01<br>111<br>3  | 0.016              | 191<br>1                  | tags=47%,<br>list=12%,<br>signal=53<br>% |
| REGULATION_OF_MITOSIS                    | 36   | -0.7227784 | -2.103995  | 0.00<br>203<br>25    | 0.00<br>947<br>78 | 0.018              | 441                       | tags=39%,<br>list=3%,<br>signal=40<br>%  |
| CELL_CYCLE_PROCESS                       | 175  | -0.6020439 | -2.098091  | 0.00<br>606<br>06    | 0.00<br>810<br>45 | 0.021              | 189<br>6                  | tags=39%,<br>list=11%,<br>signal=44<br>% |
| DNA_REPAIR                               | 110  | -0.5683734 | -2.078699  | 0                    | 0.00<br>902<br>14 | 0.03               | 191<br>1                  | tags=35%,<br>list=12%,<br>signal=39<br>% |
| CELL_CYCLE_PHASE                         | 153  | -0.5939316 | -2.0732765 | 0.00<br>806<br>45    | 0.00<br>826<br>88 | 0.033              | 251<br>7                  | tags=42%,<br>list=15%,<br>signal=49<br>% |
| DNA_METABOLIC_PROCESS                    | 229  | -0.5257379 | -2.0633385 | 0.00<br>404<br>04    | 0.00<br>843<br>37 | 0.037              | 191<br>1                  | tags=32%,<br>list=12%,<br>signal=36<br>% |
| DNA_REPLICATION                          | 93   | -0.5967884 | -2.0442684 | 0.00<br>414<br>94    | 0.00<br>886<br>35 | 0.046              | 191<br>1                  | tags=38%,<br>list=12%,<br>signal=42<br>% |
| M_PHASE_OF_MITOTIC_CELL_CYCLE            | 76   | -0.6681321 | -2.0280175 | 0.00<br>829<br>88    | 0.01<br>037<br>59 | 0.057              | 589                       | tags=36%,<br>list=4%,<br>signal=37<br>%  |
| MITOSIS                                  | 73   | -0.6653343 | -2.0132692 | 0.00<br>831<br>6     | 0.01<br>056<br>45 | 0.066              | 589                       | tags=36%,<br>list=4%,<br>signal=37<br>%  |
| RESPONSE_TO_DNA_DAMAGE_STIMULUS          | 143  | -0.5180857 | -2.0058506 | 0.00<br>204<br>92    | 0.01<br>054<br>38 | 0.072              | 270<br>6                  | tags=37%,<br>list=16%,<br>signal=44<br>% |
| REGULATION_OF_GENE_EXPRESSION_EPIGENETIC | 28   | -0.620373  | -1.9912269 | 0                    | 0.01<br>159<br>52 | 0.083              | 135<br>9                  | tags=36%,<br>list=8%,<br>signal=39<br>%  |
| MEIOTIC_CELL_CYCLE                       | 30   | -0.6747697 | -1.977847  | 0                    | 0.01<br>243       | 0.089              | 251<br>7                  | tags=53%,<br>list=15%,                   |

|                                  |     |            |            |           |           |       |      |                                |
|----------------------------------|-----|------------|------------|-----------|-----------|-------|------|--------------------------------|
|                                  |     |            |            |           | 48        |       |      | signal=63%                     |
| RESPONSE_TO_ENDOGENOUS_STIMULUS  | 178 | -0.4732107 | -1.9758451 | 0         | 0.011817  | 0.089 | 3235 | tags=38%, list=20%, signal=46% |
| ORGANELLE_LOCALIZATION           | 23  | -0.6114302 | -1.9455433 | 0         | 0.0161809 | 0.132 | 441  | tags=30%, list=3%, signal=31%  |
| CELL_CYCLE_CHECKPOINT_GO_0000075 | 42  | -0.6341423 | -1.9398936 | 0.01      | 0.0165203 | 0.144 | 2706 | tags=52%, list=16%, signal=62% |
| MITOTIC_CELL_CYCLE               | 138 | -0.5599372 | -1.93874   | 0.0199203 | 0.0157299 | 0.145 | 1849 | tags=34%, list=11%, signal=38% |
| CELL_CYCLE_GO_0007049            | 284 | -0.4878363 | -1.9308627 | 0.0099404 | 0.0165395 | 0.16  | 1956 | tags=30%, list=12%, signal=33% |
| MEIOSIS_I                        | 17  | -0.7186291 | -1.9257898 | 0.001996  | 0.0167939 | 0.167 | 1504 | tags=53%, list=9%, signal=58%  |

**Biological Process (LFGC)**

| NAME                                                              | SIZE | ES        | NES       | NO M p-val | FDR q-val | FWE R p-val | RANK AT MAX | LEADING EDGE                   |
|-------------------------------------------------------------------|------|-----------|-----------|------------|-----------|-------------|-------------|--------------------------------|
| BONE_REMODELING                                                   | 28   | 0.5837959 | 1.8827065 | 0.0022676  | 0.8077714 | 0.242       | 2183        | tags=39%, list=13%, signal=45% |
| G_PROTEIN_SIGNALING_COUPLED_TO_CYCLIC_NUCLEOTIDE_SECOND_MESSENGER | 94   | 0.4412195 | 1.8440132 | 0          | 0.6043246 | 0.326       | 3773        | tags=40%, list=23%, signal=52% |
| CYCLIC_NUCLEOTIDE_MEDIATED_SIGNALING                              | 96   | 0.4327054 | 1.8185772 | 0          | 0.5129932 | 0.403       | 3773        | tags=40%, list=23%, signal=51% |
| SECOND_MESSENGER_MEDIATED_SIGNALING                               | 142  | 0.4236116 | 1.7985157 | 0          | 0.4633081 | 0.457       | 3773        | tags=39%, list=23%, signal=51% |
| TISSUE_REMODELING                                                 | 29   | 0.547134  | 1.7777083 | 0.0022676  | 0.4474539 | 0.509       | 2183        | tags=38%, list=13%, signal=44% |
| G_PROTEIN_SIGNALING_COUPLED_TO_CAMP_NUCLEOTIDE_SECOND_MESSENGER   | 62   | 0.4338301 | 1.7289587 | 0.0043764  | 0.5601189 | 0.64        | 3773        | tags=40%, list=23%, signal=52% |
| CAMP_MEDIATED_SIGNALING                                           | 63   | 0.429736  | 1.7278168 | 0.0044346  | 0.4838306 | 0.643       | 3773        | tags=40%, list=23%, signal=51% |

|                                                                               |      |            |            |           |           |            |             |                                |
|-------------------------------------------------------------------------------|------|------------|------------|-----------|-----------|------------|-------------|--------------------------------|
| REGULATION_OF_HEART_CONTRACTION                                               | 24   | 0.5629414  | 1.7137011  | 0.0241228 | 0.4789264 | 0.68       | 3060        | tags=46%, list=18%, signal=56% |
| RESPONSE_TO_VIRUS                                                             | 37   | 0.6080874  | 1.7080084  | 0.0308285 | 0.4441279 | 0.695      | 2834        | tags=54%, list=17%, signal=65% |
| ENERGY_DERIVATION_BY_OXIDATION_OF_ORGANIC_COMPOUNDS                           | 35   | 0.5616012  | 1.6965986  | 0.0219124 | 0.4350027 | 0.726      | 3566        | tags=51%, list=22%, signal=65% |
| G_PROTEIN_SIGNALING_COUPLED_TO_IP3_SECOND_MESSENGERPHOSPHOLIPASE_C_ACTIVATING | 43   | 0.4625911  | 1.6809778  | 0.0045147 | 0.447155  | 0.765      | 3406        | tags=40%, list=21%, signal=50% |
| PHOSPHOINOSITIDE_MEDIATED_SIGNALING                                           | 46   | 0.4494167  | 1.6508359  | 0.0067416 | 0.5164834 | 0.818      | 3406        | tags=39%, list=21%, signal=49% |
| CELL_SUBSTRATE_ADHESION                                                       | 38   | 0.4938582  | 1.6485391  | 0.0216963 | 0.4853369 | 0.823      | 3722        | tags=47%, list=22%, signal=61% |
| RESPONSE_TO_OTHER_ORGANISM                                                    | 65   | 0.5113334  | 1.607881   | 0.0425963 | 0.5987135 | 0.888      | 4209        | tags=54%, list=25%, signal=72% |
| AXON_GUIDANCE                                                                 | 20   | 0.546113   | 1.5928898  | 0.0367171 | 0.616441  | 0.914      | 1687        | tags=40%, list=10%, signal=44% |
| CELL_MATRIX_ADHESION                                                          | 37   | 0.4754125  | 1.5913014  | 0.0357143 | 0.5845706 | 0.915      | 3722        | tags=46%, list=22%, signal=59% |
| INSULIN_RECEPTOR_SIGNALING_PATHWAY                                            | 17   | 0.5940896  | 1.5898261  | 0.0471311 | 0.5567232 | 0.916      | 4604        | tags=65%, list=28%, signal=89% |
| RESPONSE_TO_BIOTIC_STIMULUS                                                   | 101  | 0.4569852  | 1.5837369  | 0.0359408 | 0.5467475 | 0.922      | 3423        | tags=43%, list=21%, signal=53% |
| SKELETAL_DEVELOPMENT                                                          | 95   | 0.4345817  | 1.5740607  | 0.0569476 | 0.5514554 | 0.931      | 3553        | tags=44%, list=21%, signal=56% |
| CALCIUM_ION_TRANSPORT                                                         | 25   | 0.5010728  | 1.5728935  | 0.0242291 | 0.5276492 | 0.932      | 3870        | tags=44%, list=23%, signal=57% |
| <b>KEGG Pathway (HFGC)</b>                                                    |      |            |            |           |           |            |             |                                |
| NAME                                                                          | SIZE | ES         | NES        | NOM p-val | FDR q-val | FWER p-val | RANK AT MAX | LEADING EDGE                   |
| KEGG_HOMOLOGOUS_RECOMBINATION                                                 | 27   | -0.7821631 | -2.0921094 | 0         | 0.00834   | 0.013      | 1419        | tags=52%, list=9%,             |



|                                               |     |            |            |           |           |       |      |                                |
|-----------------------------------------------|-----|------------|------------|-----------|-----------|-------|------|--------------------------------|
|                                               |     |            |            |           | 65        |       |      | signal=57%                     |
| KEGG_MISMATCH_REPAIR                          | 22  | -0.7855697 | -1.9719963 | 0.0020833 | 0.0225981 | 0.059 | 2093 | tags=55%, list=13%, signal=62% |
| KEGG_CELL_CYCLE                               | 115 | -0.5960533 | -1.9206722 | 0.006237  | 0.0272204 | 0.09  | 2339 | tags=47%, list=14%, signal=54% |
| KEGG_DNA_REPLICATION                          | 33  | -0.8120576 | -1.9124084 | 0         | 0.0227869 | 0.096 | 570  | tags=58%, list=3%, signal=60%  |
| KEGG_BASE_EXCISION_REPAIR                     | 30  | -0.6350449 | -1.8123506 | 0.0081301 | 0.0599964 | 0.239 | 2604 | tags=53%, list=16%, signal=63% |
| KEGG_PYRIMIDINE_METABOLISM                    | 84  | -0.457888  | -1.648735  | 0.0167364 | 0.2059161 | 0.615 | 1291 | tags=25%, list=8%, signal=27%  |
| KEGG_SPLICEOSOME                              | 116 | -0.5450181 | -1.6371747 | 0.0433925 | 0.1944765 | 0.642 | 3614 | tags=52%, list=22%, signal=66% |
| KEGG_OOCYTE_MEIOSIS                           | 101 | -0.4245597 | -1.6295837 | 0.0168224 | 0.1786417 | 0.66  | 976  | tags=22%, list=6%, signal=23%  |
| KEGG_NUCLEOTIDE_EXCISION_REPAIR               | 39  | -0.5257825 | -1.6200255 | 0.0351563 | 0.1698185 | 0.684 | 2143 | tags=33%, list=13%, signal=38% |
| KEGG_N_GLYCAN_BIOSYNTHESIS                    | 42  | -0.4592321 | -1.5965395 | 0.0368664 | 0.181347  | 0.733 | 2905 | tags=38%, list=18%, signal=46% |
| KEGG_MATURITY_ONSET_DIABETES_OF_THE_YOUNG     | 25  | -0.5502435 | -1.5653161 | 0.0581162 | 0.2020812 | 0.794 | 3270 | tags=44%, list=20%, signal=55% |
| KEGG_BASAL_TRANSCRIPTION_FACTORS              | 31  | -0.4453705 | -1.4513489 | 0.082996  | 0.3563504 | 0.934 | 2762 | tags=32%, list=17%, signal=39% |
| KEGG_UBIQUITIN_MEDIATED_PROTEOLYSIS           | 119 | -0.3430879 | -1.4071141 | 0.0550847 | 0.4076045 | 0.969 | 3056 | tags=29%, list=18%, signal=35% |
| KEGG_PROGESTERONE_MEDIATED_OOCYTE_MATURATION  | 77  | -0.3630972 | -1.3535997 | 0.1175337 | 0.4821322 | 0.987 | 2171 | tags=27%, list=13%, signal=31% |
| KEGG_P53_SIGNALING_PATHWAY                    | 60  | -0.3579201 | -1.3314016 | 0.1078838 | 0.4952371 | 0.99  | 2250 | tags=28%, list=14%, signal=33% |
| KEGG_PENTOSE_AND_GLUCURONATE_INTERCONVERSIONS | 26  | -0.520304  | -1.2967172 | 0.2302632 | 0.5338726 | 0.993 | 4224 | tags=46%, list=25%, signal=62% |

|                                                           |      |            |            |           |           |            |             |                                |
|-----------------------------------------------------------|------|------------|------------|-----------|-----------|------------|-------------|--------------------------------|
|                                                           |      |            |            |           |           |            |             | %                              |
| KEGG_BLADDER_CANCER                                       | 37   | -0.3534546 | -1.1797932 | 0.244898  | 0.7698757 | 1          | 4124        | tags=43%, list=25%, signal=57% |
| KEGG_THYROID_CANCER                                       | 28   | -0.351849  | -1.1598387 | 0.2665289 | 0.7766116 | 1          | 2043        | tags=21%, list=12%, signal=24% |
| KEGG_TERPENOID_BACKBONE_BIOSYNTHESIS                      | 15   | -0.4792478 | -1.1281612 | 0.3621053 | 0.8139191 | 1          | 1813        | tags=40%, list=11%, signal=45% |
| KEGG_RIBOSOME                                             | 80   | -0.5202168 | -1.118066  | 0.4309278 | 0.7972894 | 1          | 5320        | tags=66%, list=32%, signal=97% |
| <b>KEGG Pathway (LFGC)</b>                                |      |            |            |           |           |            |             |                                |
| NAME                                                      | SIZE | ES         | NES        | NOM p-val | FDR q-val | FWER p-val | RANK AT MAX | LEADING EDGE                   |
| KEGG_CALCIIUM_SIGNALING_PATHWAY                           | 155  | 0.4612967  | 1.9231007  | 0         | 0.2147519 | 0.101      | 3474        | tags=39%, list=21%, signal=49% |
| KEGG_REGULATION_OF_AUTO PHAGY                             | 19   | 0.5696816  | 1.750542   | 0.0102041 | 0.7194228 | 0.397      | 1729        | tags=32%, list=10%, signal=35% |
| KEGG_VASCULAR_SMOOTH_MUSCLE_CONTRACTION                   | 106  | 0.4589802  | 1.7177393  | 0.0108225 | 0.6369793 | 0.471      | 2705        | tags=37%, list=16%, signal=44% |
| KEGG_VALINE_LEUCINE_AND_ ISOLEUCINE_DEGRADATION           | 42   | 0.6580745  | 1.6309192  | 0.0534653 | 0.9256749 | 0.673      | 2805        | tags=60%, list=17%, signal=71% |
| KEGG_HEMATOPOIETIC_CELL_ LINEAGE                          | 80   | 0.4910937  | 1.6131573  | 0.0688259 | 0.8442543 | 0.715      | 4248        | tags=52%, list=26%, signal=70% |
| KEGG_GLYCOSAMINOGLYCAN_ BIOSYNTHESIS_CHONDROITIN_ SULFATE | 21   | 0.5366713  | 1.5693448  | 0.0434783 | 0.927301  | 0.803      | 1176        | tags=38%, list=7%, signal=41%  |
| KEGG_CYTOKINE_CYTOKINE_ RECEPTOR_INTERACTION              | 226  | 0.4284237  | 1.5615697  | 0.0597015 | 0.8342742 | 0.815      | 4104        | tags=43%, list=25%, signal=56% |
| KEGG_APOPTOSIS                                            | 78   | 0.4165952  | 1.5483484  | 0.0372549 | 0.790282  | 0.836      | 3311        | tags=37%, list=20%, signal=46% |
| KEGG_DILATED_CARDIOMYOP ATHY                              | 82   | 0.4527537  | 1.5069128  | 0.0651163 | 0.8841164 | 0.891      | 3267        | tags=41%, list=20%, signal=51% |

|                                                |     |           |           |           |           |       |      |                                |
|------------------------------------------------|-----|-----------|-----------|-----------|-----------|-------|------|--------------------------------|
| KEGG_NICOTINATE_AND_NICOTINAMIDE_METABOLISM    | 22  | 0.4871063 | 1.4966484 | 0.0565657 | 0.8410843 | 0.896 | 5949 | tags=64%, list=36%, signal=99% |
| KEGG_NEUROACTIVE_LIGAND_RECEPTOR_INTERACTION   | 229 | 0.3238937 | 1.4924084 | 0.0221607 | 0.7820019 | 0.901 | 3755 | tags=31%, list=23%, signal=40% |
| KEGG_B_CELL_RECEPTOR_SIGNALING_PATHWAY         | 71  | 0.4492866 | 1.4923524 | 0.0848485 | 0.7168351 | 0.901 | 2989 | tags=41%, list=18%, signal=50% |
| KEGG_CITRATE_CYCLE_TCA_CYCLE                   | 28  | 0.573049  | 1.485822  | 0.0989899 | 0.6881833 | 0.909 | 3566 | tags=54%, list=22%, signal=68% |
| KEGG_CHEMOKINE_SIGNALING_PATHWAY               | 179 | 0.403439  | 1.4697447 | 0.0907173 | 0.6943442 | 0.925 | 4240 | tags=45%, list=26%, signal=60% |
| KEGG_ETHER_LIPID_METABOLISM                    | 30  | 0.4054771 | 1.4601877 | 0.0378947 | 0.6810028 | 0.938 | 1951 | tags=30%, list=12%, signal=34% |
| KEGG_NATURAL_KILLER_CELL_MEDIATED_CYTOTOXICITY | 111 | 0.4265771 | 1.4512093 | 0.1234568 | 0.6678835 | 0.944 | 3561 | tags=43%, list=21%, signal=55% |
| KEGG_JAK_STAT_SIGNALING_PATHWAY                | 122 | 0.3924675 | 1.4459618 | 0.0817204 | 0.6446661 | 0.949 | 3064 | tags=32%, list=18%, signal=39% |
| KEGG_CELL_ADHESION_MOLECULES_CAMS              | 115 | 0.4258497 | 1.4085304 | 0.1283644 | 0.7238066 | 0.968 | 3303 | tags=41%, list=20%, signal=51% |
| KEGG_ECM_RECEPTOR_INTERACTION                  | 79  | 0.4428824 | 1.4052496 | 0.169697  | 0.6949843 | 0.97  | 3400 | tags=46%, list=21%, signal=57% |
| KEGG_LEISHMANIA_INFECTION                      | 63  | 0.4759485 | 1.3842937 | 0.1816367 | 0.7285357 | 0.976 | 3303 | tags=43%, list=20%, signal=53% |

**Oncogenic (HFGC)**

| NAME               | SIZE | ES         | NES        | NO M p-val | FDR q-val | FWE R p-val | RANK AT MAX | LEADING EDGE                   |
|--------------------|------|------------|------------|------------|-----------|-------------|-------------|--------------------------------|
| RPS14_DN.V1_DN     | 163  | -0.5448914 | -2.1645298 | 0          | 0         | 0           | 1825        | tags=33%, list=11%, signal=37% |
| PRC2_EZH2_UP.V1_UP | 165  | -0.4864141 | -2.0560021 | 0          | 8.97E-04  | 0.005       | 886         | tags=27%, list=5%, signal=28%  |
| E2F1_UP.V1_UP      | 173  | -0.4767531 | -1.8829107 | 0.0037951  | 0.0119927 | 0.072       | 2545        | tags=35%, list=15%, signal=41% |

|                         |     |            |            |                   |                   |       |          |                                          |
|-------------------------|-----|------------|------------|-------------------|-------------------|-------|----------|------------------------------------------|
|                         |     |            |            |                   |                   |       |          | %                                        |
| RB_P107_DN.V1_UP        | 125 | -0.5648047 | -1.833929  | 0.02<br>016<br>13 | 0.01<br>706<br>37 | 0.114 | 159<br>5 | tags=42%,<br>list=10%,<br>signal=47<br>% |
| RB_DN.V1_UP             | 119 | -0.4355741 | -1.7348772 | 0.00<br>618<br>56 | 0.03<br>749<br>32 | 0.227 | 246<br>5 | tags=33%,<br>list=15%,<br>signal=38<br>% |
| GCNP_SHH_UP_EARLY.V1_UP | 152 | -0.4522155 | -1.7185619 | 0.01<br>747<br>57 | 0.03<br>634<br>83 | 0.251 | 302<br>5 | tags=36%,<br>list=18%,<br>signal=44<br>% |
| CSR_LATE_UP.V1_UP       | 152 | -0.4781577 | -1.688554  | 0.02<br>462<br>12 | 0.04<br>035<br>53 | 0.31  | 215<br>1 | tags=38%,<br>list=13%,<br>signal=43<br>% |
| E2F3_UP.V1_UP           | 162 | -0.3926694 | -1.6751021 | 0.00<br>583<br>66 | 0.03<br>945<br>61 | 0.326 | 279<br>6 | tags=31%,<br>list=17%,<br>signal=37<br>% |
| HOXA9_DN.V1_DN          | 164 | -0.4006853 | -1.6392138 | 0.00<br>803<br>21 | 0.04<br>880<br>03 | 0.412 | 337<br>5 | tags=37%,<br>list=20%,<br>signal=46<br>% |
| GCNP_SHH_UP_LATE.V1_UP  | 160 | -0.4417787 | -1.6136187 | 0.03<br>294<br>57 | 0.05<br>397<br>83 | 0.465 | 156<br>3 | tags=25%,<br>list=9%,<br>signal=27<br>%  |
| PRC2_EDD_UP.V1_UP       | 171 | -0.3744294 | -1.5758784 | 0.02<br>880<br>66 | 0.06<br>668<br>54 | 0.558 | 214<br>3 | tags=26%,<br>list=13%,<br>signal=30<br>% |
| MTOR_UP.V1_UP           | 153 | -0.344041  | -1.5182328 | 0.03<br>168<br>32 | 0.09<br>481<br>24 | 0.684 | 281<br>7 | tags=28%,<br>list=17%,<br>signal=34<br>% |
| RB_P130_DN.V1_UP        | 116 | -0.3776458 | -1.5029774 | 0.02<br>464<br>07 | 0.09<br>595<br>03 | 0.711 | 285<br>0 | tags=32%,<br>list=17%,<br>signal=38<br>% |
| SRC_UP.V1_DN            | 145 | -0.3309808 | -1.4914079 | 0.01<br>495<br>33 | 0.09<br>684<br>81 | 0.73  | 173<br>9 | tags=21%,<br>list=10%,<br>signal=24<br>% |
| MYC_UP.V1_UP            | 146 | -0.3925988 | -1.4314686 | 0.10<br>647<br>18 | 0.13<br>353<br>23 | 0.838 | 498<br>5 | tags=49%,<br>list=30%,<br>signal=69<br>% |
| VEGF_A_UP.V1_DN         | 176 | -0.3885405 | -1.419865  | 0.09<br>942<br>64 | 0.13<br>468<br>64 | 0.855 | 148<br>9 | tags=21%,<br>list=9%,<br>signal=23<br>%  |
| TBK1.DN.48HRS_UP        | 46  | -0.397412  | -1.419133  | 0.06<br>118<br>14 | 0.12<br>732<br>93 | 0.857 | 328<br>8 | tags=35%,<br>list=20%,<br>signal=43<br>% |
| BCAT_GDS748_DN          | 40  | -0.3437548 | -1.3097826 | 0.11<br>623<br>25 | 0.22<br>799<br>08 | 0.96  | 375<br>1 | tags=45%,<br>list=23%,<br>signal=58      |

|                         |      |            |            |            |           |             |              | %                              |
|-------------------------|------|------------|------------|------------|-----------|-------------|--------------|--------------------------------|
| NFE2L2.V2               | 381  | -0.2793905 | -1.2796575 | 0.1237525  | 0.2551636 | 0.976       | 3066         | tags=24%, list=18%, signal=28% |
| DCA_UP.V1_DN            | 150  | -0.2611077 | -1.2338156 | 0.0963855  | 0.3085801 | 0.991       | 2724         | tags=23%, list=16%, signal=27% |
| <b>Oncogenic (LFGC)</b> |      |            |            |            |           |             |              |                                |
| NAME                    | SIZE | ES         | NES        | NO M P-val | FDR q-val | FWE R p-val | RA NK AT MAX | LEADING EDGE                   |
| HOXA9_DN.V1_UP          | 171  | 0.519038   | 1.9048997  | 0.0039448  | 0.1010086 | 0.054       | 4414         | tags=56%, list=27%, signal=75% |
| PTEN_DN.V1_UP           | 160  | 0.4476807  | 1.8342359  | 0.0022272  | 0.1234086 | 0.112       | 3479         | tags=41%, list=21%, signal=52% |
| LEF1_UP.V1_UP           | 163  | 0.511918   | 1.8233509  | 0.0147059  | 0.0920985 | 0.12        | 3526         | tags=47%, list=21%, signal=59% |
| RPS14_DN.V1_UP          | 179  | 0.5407417  | 1.7733334  | 0.0308008  | 0.1211903 | 0.176       | 3525         | tags=48%, list=21%, signal=60% |
| BMI1_DN_MEL18_DN.V1_DN  | 131  | 0.4469608  | 1.7732651  | 0          | 0.0969523 | 0.176       | 3682         | tags=37%, list=22%, signal=48% |
| P53_DN.V1_DN            | 175  | 0.4529273  | 1.7417918  | 0.0100604  | 0.1107258 | 0.224       | 3867         | tags=45%, list=23%, signal=58% |
| CAHOY_ASTROGLIAL        | 86   | 0.5048821  | 1.7266909  | 0.0229885  | 0.111695  | 0.252       | 2976         | tags=44%, list=18%, signal=54% |
| ATF2_UP.V1_DN           | 171  | 0.4762719  | 1.7226397  | 0.014      | 0.1000324 | 0.254       | 3770         | tags=49%, list=23%, signal=62% |
| KRAS.600_UP.V1_UP       | 236  | 0.3785581  | 1.7125484  | 0.0042373  | 0.0980176 | 0.268       | 3257         | tags=33%, list=20%, signal=41% |
| MEL18_DN.V1_DN          | 132  | 0.4435261  | 1.708167   | 0.0039841  | 0.0913319 | 0.273       | 4001         | tags=43%, list=24%, signal=56% |
| PRC2_EZH2_UP.V1_DN      | 158  | 0.4094486  | 1.6979431  | 0.0021097  | 0.09284   | 0.295       | 2820         | tags=30%, list=17%, signal=36% |

|                      |     |           |           |                   |                   |       |          |                                          |
|----------------------|-----|-----------|-----------|-------------------|-------------------|-------|----------|------------------------------------------|
| ATF2_S_UP.V1_DN      | 165 | 0.4447916 | 1.678042  | 0.02<br>182<br>54 | 0.10<br>172<br>7  | 0.328 | 368<br>2 | tags=44%,<br>list=22%,<br>signal=56<br>% |
| SNF5_DN.V1_DN        | 144 | 0.398627  | 1.6590326 | 0.00<br>199<br>2  | 0.11<br>278<br>94 | 0.372 | 360<br>7 | tags=38%,<br>list=22%,<br>signal=48<br>% |
| PTEN_DN.V2_UP        | 121 | 0.4029441 | 1.6550689 | 0.00<br>801<br>6  | 0.10<br>770<br>28 | 0.382 | 378<br>6 | tags=40%,<br>list=23%,<br>signal=51<br>% |
| CYCLIN_D1_KE_.V1_DN  | 171 | 0.3794514 | 1.6550121 | 0.01<br>054<br>85 | 0.10<br>052<br>26 | 0.382 | 409<br>3 | tags=40%,<br>list=25%,<br>signal=53<br>% |
| STK33_SKM_UP         | 245 | 0.4252608 | 1.6459278 | 0.02<br>024<br>29 | 0.10<br>044<br>87 | 0.398 | 284<br>5 | tags=35%,<br>list=17%,<br>signal=41<br>% |
| BMI1_DN.V1_UP        | 131 | 0.4983971 | 1.6403983 | 0.03<br>925<br>62 | 0.09<br>909<br>74 | 0.409 | 281<br>7 | tags=40%,<br>list=17%,<br>signal=48<br>% |
| AKT_UP.V1_DN         | 171 | 0.4042722 | 1.6097466 | 0.01<br>500<br>94 | 0.11<br>658<br>51 | 0.46  | 383<br>8 | tags=43%,<br>list=23%,<br>signal=56<br>% |
| STK33_UP             | 256 | 0.4384923 | 1.6074026 | 0.02<br>811<br>25 | 0.11<br>168<br>33 | 0.464 | 433<br>5 | tags=45%,<br>list=26%,<br>signal=59<br>% |
| KRAS.KIDNEY_UP.V1_UP | 130 | 0.4079987 | 1.6069605 | 0.02<br>469<br>14 | 0.10<br>655<br>67 | 0.465 | 508<br>4 | tags=53%,<br>list=31%,<br>signal=76<br>% |

**Table S7. Overlapped GSEA result HFGC and LFGC of Thai HCC and Thai iCCA**

| Name                                                      | Size     | ES      | NES      | NOM .p.val | Size      | ES      | NES      | NOM.p .val |
|-----------------------------------------------------------|----------|---------|----------|------------|-----------|---------|----------|------------|
|                                                           | HCC_HFGC |         |          |            | iCCA_HFGC |         |          |            |
| <b>Biological Process</b>                                 |          |         |          |            |           |         |          |            |
| DNA_DEPENDENT_DNA_REPLICATION                             | 40       | -0.6292 | -1.76602 | 0.0221     | 43        | -0.6745 | -1.90739 | 0.002      |
| CHROMOSOME_SEGREGATION                                    | 21       | -0.6397 | -1.63112 | 0.0593     | 21        | -0.7025 | -1.8006  | 0.0039     |
| DNA_REPLICATION                                           | 70       | -0.5365 | -1.61436 | 0.0561     | 75        | -0.5991 | -1.80371 | 0.008      |
| REGULATION_OF_MITOSIS                                     | 26       | -0.5389 | -1.42042 | 0.1499     | 26        | -0.6822 | -1.78362 | 0.008      |
| M_PHASE                                                   | 71       | -0.4987 | -1.41633 | 0.1747     | 70        | -0.6641 | -1.85491 | 0.004      |
| <b>KEGG pathway</b>                                       |          |         |          |            |           |         |          |            |
| KEGG_GLYCOSYLPHOSPHATIDYLINOSITOL_GPI_ANCHOR_BIOSYNTHESIS | 17       | -0.6601 | -1.68827 | 0.0137     | 18        | -0.5825 | -1.49526 | 0.0538     |
| KEGG_MISMATCH_REPAIR                                      | 20       | -0.6784 | -1.6523  | 0.0307     | 19        | -0.7417 | -1.77585 | 0.0059     |
| KEGG_DNA_REPLICATION                                      | 30       | -0.6926 | -1.58928 | 0.0615     | 29        | -0.8124 | -1.86008 | 0.0019     |
| KEGG_N_GLYCAN_BIOSYNTHESIS                                | 35       | -0.478  | -1.51036 | 0.0625     | 37        | -0.5023 | -1.56237 | 0.0462     |
| KEGG_NUCLEOTIDE_EXCISION_REPAIR                           | 36       | -0.4986 | -1.43636 | 0.1288     | 34        | -0.5713 | -1.58788 | 0.0355     |
| KEGG_BASE_EXCISION_REPAIR                                 | 23       | -0.5365 | -1.41653 | 0.1245     | 21        | -0.6762 | -1.7393  | 0.0077     |
| KEGG_CELL_CYCLE                                           | 92       | -0.4608 | -1.35385 | 0.1968     | 90        | -0.6096 | -1.72089 | 0.0211     |
| KEGG_HOMOLOGOUS_RECOMBINATION                             | 17       | -0.5631 | -1.32721 | 0.182      | 16        | -0.7101 | -1.68874 | 0.0134     |
| KEGG_SPLICEOSOME                                          | 95       | -0.4581 | -1.31074 | 0.2162     | 96        | -0.5311 | -1.552   | 0.0825     |
| KEGG_PYRIMIDINE_METABOLISM                                | 65       | -0.3794 | -1.22892 | 0.249      | 62        | -0.5061 | -1.59065 | 0.0476     |
| KEGG_AMINOACYL_TRNA_BIOSYNTHESIS                          | 32       | -0.4419 | -1.2235  | 0.2818     | 30        | -0.6253 | -1.60137 | 0.0329     |
| KEGG_PROGESTERONE_MEDIATED_OOCYTE_MATURATION              | 54       | -0.3868 | -1.2147  | 0.2764     | 54        | -0.4414 | -1.44729 | 0.0696     |

|                                  |                 |         |          |        |                  |         |          |        |
|----------------------------------|-----------------|---------|----------|--------|------------------|---------|----------|--------|
| KEGG_BASAL_TRANSCRIPTION_FACTORS | 25              | -0.405  | -1.17575 | 0.2684 | 24               | -0.5638 | -1.54818 | 0.0511 |
| KEGG_RNA_POLYMERASE              | 23              | -0.4418 | -1.16567 | 0.3058 | 23               | -0.6545 | -1.64476 | 0.0059 |
| KEGG_OOCYTE_MEIOSIS              | 75              | -0.3366 | -1.09607 | 0.3764 | 77               | -0.4877 | -1.61648 | 0.0206 |
| <b>Oncogenic pathway</b>         |                 |         |          |        |                  |         |          |        |
| GCNP_SHH_UP_EARLY.V1_UP          | 112             | -0.4456 | -1.61302 | 0.0229 | 115              | -0.4474 | -1.65347 | 0.0189 |
| RB_P107_DN.V1_UP                 | 94              | -0.5206 | -1.57264 | 0.0814 | 88               | -0.6059 | -1.923   | 0.0059 |
| RB_DN.V1_UP                      | 91              | -0.4622 | -1.53291 | 0.056  | 89               | -0.5635 | -1.93142 | 0.0039 |
| RPS14_DN.V1_DN                   | 128             | -0.4388 | -1.51859 | 0.0663 | 132              | -0.5152 | -1.76369 | 0.0213 |
| HOXA9_DN.V1_DN                   | 131             | -0.3946 | -1.49063 | 0.0526 | 135              | -0.4055 | -1.53515 | 0.0503 |
| RB_P130_DN.V1_UP                 | 73              | -0.4025 | -1.44796 | 0.062  | 78               | -0.4179 | -1.61577 | 0.0203 |
| GCNP_SHH_UP_LATE.V1_UP           | 128             | -0.3897 | -1.42891 | 0.0935 | 128              | -0.3713 | -1.39788 | 0.1212 |
| E2F3_UP.V1_UP                    | 102             | -0.3626 | -1.30344 | 0.167  | 105              | -0.3547 | -1.40734 | 0.0911 |
| PRC2_EZH2_UP.V1_UP               | 109             | -0.361  | -1.29241 | 0.1795 | 117              | -0.4752 | -1.77755 | 0.0115 |
| MYC_UP.V1_UP                     | 106             | -0.3462 | -1.28213 | 0.1741 | 105              | -0.4026 | -1.32091 | 0.1899 |
| E2F1_UP.V1_UP                    | 119             | -0.3708 | -1.21113 | 0.3092 | 123              | -0.5175 | -1.75653 | 0.0179 |
| CSR_LATE_UP.V1_UP                | 125             | -0.3774 | -1.20792 | 0.3066 | 125              | -0.5026 | -1.61629 | 0.0247 |
| EGFR_UP.V1_DN                    | 136             | -0.2901 | -1.19597 | 0.196  | 135              | -0.3226 | -1.39144 | 0.0588 |
| VEGF_A_UP.V1_DN                  | 145             | -0.2911 | -1.05405 | 0.3853 | 147              | -0.3992 | -1.44666 | 0.1016 |
| TBK1.DN.48HRS_UP                 | 37              | -0.3257 | -1.04908 | 0.4129 | 39               | -0.4025 | -1.34081 | 0.1044 |
|                                  | <b>HCC_LFGC</b> |         |          |        | <b>iCCA_LFGC</b> |         |          |        |
| <b>Biological Process</b>        |                 |         |          |        |                  |         |          |        |



|                                                         |     |        |          |        |     |        |          |        |
|---------------------------------------------------------|-----|--------|----------|--------|-----|--------|----------|--------|
| IMMUNE_RESPONSE                                         | 145 | 0.6187 | 1.971024 | 0.0043 | 152 | 0.6352 | 1.852819 | 0.0233 |
| DEFENSE_RESPONSE                                        | 173 | 0.5714 | 1.936295 | 0.0089 | 189 | 0.6299 | 1.883574 | 0.0162 |
| IMMUNE_SYSTEM_PROCESS                                   | 207 | 0.5764 | 1.8863   | 0.0088 | 219 | 0.5803 | 1.845352 | 0.0307 |
| RESPONSE_TO_OTHER_ORGANISM                              | 37  | 0.6336 | 1.831636 | 0.0066 | 48  | 0.6462 | 1.828193 | 0.0161 |
| MULTI_ORGANISM_PROCESS                                  | 77  | 0.5058 | 1.830873 | 0.0065 | 97  | 0.5187 | 1.767454 | 0.0182 |
| CELLULAR_DEFENSE_RESPONSE                               | 38  | 0.6674 | 1.82391  | 0.0137 | 40  | 0.6893 | 1.756464 | 0.0291 |
| LOCOMOTORY_BEHAVIOR                                     | 64  | 0.5951 | 1.808114 | 0.0134 | 74  | 0.6033 | 1.772803 | 0.0164 |
| POSITIVE_REGULATION_OF_MULTICELLULAR_ORGANISMAL_PROCESS | 39  | 0.5598 | 1.78999  | 0.0107 | 42  | 0.6503 | 1.828494 | 0.0101 |
| INFLAMMATORY_RESPONSE                                   | 90  | 0.5363 | 1.749392 | 0.0278 | 100 | 0.6446 | 1.858764 | 0.0142 |
| REGULATION_OF_IMMUNE_SYSTEM_PROCESS                     | 39  | 0.562  | 1.72683  | 0.0277 | 39  | 0.6153 | 1.72256  | 0.0339 |
| <b>KEGG pathway</b>                                     |     |        |          |        |     |        |          |        |
| KEGG_HEMATOPOIETIC_CELL_LINEAGE                         | 47  | 0.7045 | 2.007128 | 0.0066 | 49  | 0.7264 | 1.866346 | 0.002  |
| KEGG_CYTOKINE_CYTOKINE_RECEPTOR_INTERACTION             | 139 | 0.5616 | 1.909341 | 0.0093 | 156 | 0.5901 | 1.843299 | 0.002  |
| KEGG_JAK_STAT_SIGNALING_PATHWAY                         | 81  | 0.5483 | 1.882923 | 0.0104 | 84  | 0.4794 | 1.554089 | 0.0713 |
| KEGG_INTESTINAL_IMMUNE_NETWORK_FOR_IGA_PRODUCTION       | 27  | 0.7342 | 1.830915 | 0.0066 | 29  | 0.6359 | 1.499596 | 0.1064 |
| KEGG_PRION_DISEASES                                     | 30  | 0.602  | 1.797722 | 0.0084 | 29  | 0.5504 | 1.459598 | 0.092  |
| KEGG_CHEMOKINE_SIGNALING_PATHWAY                        | 132 | 0.5092 | 1.776465 | 0.0298 | 142 | 0.458  | 1.585065 | 0.0538 |
| KEGG_NATURAL_KILLER_CELL_MEDIATED_CYTOTOXICITY          | 75  | 0.5672 | 1.768625 | 0.039  | 80  | 0.5364 | 1.660275 | 0.0455 |
| KEGG_CELL_ADHESION_MOLECULES_CAMS                       | 94  | 0.5157 | 1.71064  | 0.0379 | 93  | 0.5438 | 1.637101 | 0.052  |
| KEGG_GRAFT_VERSUS_HOST_DISEASE                          | 24  | 0.7462 | 1.672133 | 0.0447 | 25  | 0.7296 | 1.496257 | 0.0682 |
| KEGG_NEUROACTIVE_LIGAND_RECEPTOR_INTERACTION            | 107 | 0.4347 | 1.658422 | 0.0051 | 108 | 0.4393 | 1.640409 | 0.0165 |
| KEGG_PRIMARY_IMMUNODEFICIENCY                           | 24  | 0.6755 | 1.627136 | 0.0485 | 26  | 0.6269 | 1.495657 | 0.1086 |
| KEGG_B_CELL_RECEPTOR_SIGNALING_PATHWAY                  | 55  | 0.5193 | 1.609815 | 0.0678 | 58  | 0.4919 | 1.570837 | 0.0593 |
| KEGG_AUTOIMMUNE_THYROID_DISEASE                         | 22  | 0.7019 | 1.59605  | 0.0606 | 23  | 0.6945 | 1.483169 | 0.0969 |
| KEGG_LEUKOCYTE_TRANSENDOTHELIAL_MIGRATION               | 77  | 0.4579 | 1.586102 | 0.0726 | 76  | 0.4963 | 1.568311 | 0.0641 |

| <b>Oncogenic pathway</b> |     |            |              |            |         |            |              |        |
|--------------------------|-----|------------|--------------|------------|---------|------------|--------------|--------|
| P53_DN.V1_DN             | 132 | 0.498<br>7 | 1.86586<br>9 | 0          | 13<br>3 | 0.535<br>5 | 1.77052<br>6 | 0.0101 |
| PTEN_DN.V2_UP            | 94  | 0.478<br>1 | 1.82592<br>1 | 0          | 94      | 0.476<br>6 | 1.64722<br>7 | 0.0261 |
| HOXA9_DN.V1_UP           | 145 | 0.532<br>4 | 1.81831<br>1 | 0.004<br>1 | 14<br>7 | 0.502<br>1 | 1.67549<br>1 | 0.039  |
| STK33_NOMO_UP            | 225 | 0.491      | 1.80965<br>1 | 0.010<br>4 | 22<br>7 | 0.453<br>3 | 1.63736<br>8 | 0.0456 |
| RPS14_DN.V1_UP           | 136 | 0.581<br>1 | 1.79871<br>8 | 0.014<br>7 | 14<br>2 | 0.602<br>5 | 1.85772<br>4 | 0.0081 |
| RELA_DN.V1_UP            | 86  | 0.457<br>4 | 1.75881<br>1 | 0.002<br>1 | 91      | 0.462<br>1 | 1.71607<br>1 | 0.0141 |
| STK33_SKM_UP             | 211 | 0.475<br>8 | 1.73922<br>4 | 0.012<br>8 | 21<br>4 | 0.408<br>5 | 1.60052<br>5 | 0.0593 |
| EGFR_UP.V1_UP            | 149 | 0.473<br>2 | 1.73765<br>9 | 0.010<br>4 | 15<br>2 | 0.530<br>7 | 1.80755<br>5 | 0.014  |
| STK33_UP                 | 221 | 0.473<br>6 | 1.73167<br>3 | 0.020<br>8 | 22<br>5 | 0.432<br>4 | 1.63189<br>3 | 0.0504 |
| KRAS.LUNG_UP.V1_UP       | 74  | 0.461<br>4 | 1.71326      | 0.006<br>7 | 81      | 0.479<br>1 | 1.6239       | 0.0207 |
| P53_DN.V2_UP             | 73  | 0.501<br>7 | 1.69996<br>2 | 0.025<br>2 | 79      | 0.570<br>4 | 1.91947<br>5 | 0      |
| KRAS.BREAST_UP.V1_UP     | 68  | 0.451<br>6 | 1.60253<br>1 | 0.043<br>4 | 71      | 0.461<br>4 | 1.63158<br>3 | 0.0328 |

**Table S8. Overlapped recurrent mutation genes between Thai HCC and Thai iCCA.**

| Gene     | mut.No.HCC | mut.freq.HCC | mut.No.iCCA | mut.freq.iCCA |
|----------|------------|--------------|-------------|---------------|
| TP53     | 22         | 0.355        | 37          | 0.411         |
| ARID2    | 9          | 0.145        | 6           | 0.067         |
| ARID1A   | 9          | 0.145        | 17          | 0.189         |
| CTNNB1   | 8          | 0.129        | 2           | 0.022         |
| APOB     | 7          | 0.113        | 4           | 0.044         |
| CSMD3    | 6          | 0.097        | 9           | 0.100         |
| AXIN1    | 5          | 0.081        | 1           | 0.011         |
| RYR2     | 4          | 0.065        | 7           | 0.078         |
| RB1      | 3          | 0.048        | 1           | 0.011         |
| ASXL1    | 3          | 0.048        | 1           | 0.011         |
| PTPRD    | 3          | 0.048        | 3           | 0.033         |
| PKHD1    | 3          | 0.048        | 1           | 0.011         |
| PIK3CA   | 3          | 0.048        | 4           | 0.044         |
| PDE4DIP  | 3          | 0.048        | 2           | 0.022         |
| SMARCA4  | 3          | 0.048        | 2           | 0.022         |
| PRKDC    | 3          | 0.048        | 6           | 0.067         |
| SCN5A    | 3          | 0.048        | 4           | 0.044         |
| NF1      | 3          | 0.048        | 6           | 0.067         |
| PBRM1    | 3          | 0.048        | 4           | 0.044         |
| RYR1     | 3          | 0.048        | 4           | 0.044         |
| KEAP1    | 3          | 0.048        | 2           | 0.022         |
| MBD1     | 2          | 0.032        | 1           | 0.011         |
| EPHA5    | 2          | 0.032        | 1           | 0.011         |
| NCOA3    | 2          | 0.032        | 1           | 0.011         |
| GRM8     | 2          | 0.032        | 1           | 0.011         |
| IGF2R    | 2          | 0.032        | 1           | 0.011         |
| KIT      | 2          | 0.032        | 1           | 0.011         |
| COL1A1   | 2          | 0.032        | 2           | 0.022         |
| LRP1B    | 2          | 0.032        | 10          | 0.111         |
| EPHA7    | 2          | 0.032        | 2           | 0.022         |
| ERBB4    | 2          | 0.032        | 4           | 0.044         |
| KMT2C    | 2          | 0.032        | 11          | 0.122         |
| EML4     | 2          | 0.032        | 1           | 0.011         |
| SAMD9    | 2          | 0.032        | 1           | 0.011         |
| EPHB1    | 2          | 0.032        | 1           | 0.011         |
| PSIP1    | 2          | 0.032        | 5           | 0.056         |
| UBR5     | 2          | 0.032        | 2           | 0.022         |
| WHSC1    | 2          | 0.032        | 1           | 0.011         |
| ACVR2A   | 2          | 0.032        | 3           | 0.033         |
| SF3B1    | 2          | 0.032        | 1           | 0.011         |
| DCC      | 2          | 0.032        | 1           | 0.011         |
| ADAMTS20 | 2          | 0.032        | 7           | 0.078         |
| NF2      | 2          | 0.032        | 1           | 0.011         |
| DNMT3A   | 1          | 0.016        | 2           | 0.022         |
| PTEN     | 1          | 0.016        | 1           | 0.011         |
| MYH11    | 1          | 0.016        | 3           | 0.033         |

|         |   |       |   |       |
|---------|---|-------|---|-------|
| JAK1    | 1 | 0.016 | 2 | 0.022 |
| RICTOR  | 1 | 0.016 | 1 | 0.011 |
| TSHR    | 1 | 0.016 | 1 | 0.011 |
| NLRP1   | 1 | 0.016 | 1 | 0.011 |
| MED12   | 1 | 0.016 | 1 | 0.011 |
| FBXO11  | 1 | 0.016 | 2 | 0.022 |
| RNF213  | 1 | 0.016 | 1 | 0.011 |
| POT1    | 1 | 0.016 | 1 | 0.011 |
| ACVR1   | 1 | 0.016 | 1 | 0.011 |
| CHEK2   | 1 | 0.016 | 1 | 0.011 |
| MYBPC3  | 1 | 0.016 | 1 | 0.011 |
| BRCA2   | 1 | 0.016 | 3 | 0.033 |
| TSC2    | 1 | 0.016 | 2 | 0.022 |
| KMT2A   | 1 | 0.016 | 1 | 0.011 |
| NSD1    | 1 | 0.016 | 1 | 0.011 |
| BCORL1  | 1 | 0.016 | 3 | 0.033 |
| ABL1    | 1 | 0.016 | 2 | 0.022 |
| EPHA3   | 1 | 0.016 | 1 | 0.011 |
| NTRK3   | 1 | 0.016 | 1 | 0.011 |
| AKAP9   | 1 | 0.016 | 3 | 0.033 |
| FN1     | 1 | 0.016 | 4 | 0.044 |
| KDM6A   | 1 | 0.016 | 1 | 0.011 |
| ITGA9   | 1 | 0.016 | 1 | 0.011 |
| TGFBR2  | 1 | 0.016 | 1 | 0.011 |
| SYNE1   | 1 | 0.016 | 7 | 0.078 |
| RNASEL  | 1 | 0.016 | 1 | 0.011 |
| PTPRT   | 1 | 0.016 | 2 | 0.022 |
| POLH    | 1 | 0.016 | 2 | 0.022 |
| CDH5    | 1 | 0.016 | 1 | 0.011 |
| GUCY1A2 | 1 | 0.016 | 1 | 0.011 |
| BAI3    | 1 | 0.016 | 4 | 0.044 |
| LPHN3   | 1 | 0.016 | 1 | 0.011 |
| COL3A1  | 1 | 0.016 | 3 | 0.033 |
| AFF3    | 1 | 0.016 | 1 | 0.011 |
| CACNA1S | 1 | 0.016 | 1 | 0.011 |
| ARID1B  | 1 | 0.016 | 1 | 0.011 |
| HGF     | 1 | 0.016 | 2 | 0.022 |
| TBX22   | 1 | 0.016 | 1 | 0.011 |
| IGF1R   | 1 | 0.016 | 1 | 0.011 |
| EP400   | 1 | 0.016 | 3 | 0.033 |
| DST     | 1 | 0.016 | 2 | 0.022 |
| GNAS    | 1 | 0.016 | 3 | 0.033 |
| ATM     | 1 | 0.016 | 5 | 0.056 |
| ERBB3   | 1 | 0.016 | 6 | 0.067 |
| NBN     | 1 | 0.016 | 1 | 0.011 |
| BAP1    | 1 | 0.016 | 4 | 0.044 |
| TRRAP   | 1 | 0.016 | 1 | 0.011 |
| PIK3R1  | 1 | 0.016 | 1 | 0.011 |

|        |   |       |   |       |
|--------|---|-------|---|-------|
| KRAS   | 1 | 0.016 | 9 | 0.100 |
| FGFR2  | 1 | 0.016 | 3 | 0.033 |
| CTNNA1 | 1 | 0.016 | 2 | 0.022 |
| CDH11  | 1 | 0.016 | 2 | 0.022 |
| MYLK   | 1 | 0.016 | 1 | 0.011 |
| MAP3K1 | 1 | 0.016 | 1 | 0.011 |

**Table S9. Recurrently mutated genes in Thai HCC**

| Gene | Chr.  | POS     | REF | ALT  | AA Change | Mutation Type | Effect                | var.f req | snp.alt |
|------|-------|---------|-----|------|-----------|---------------|-----------------------|-----------|---------|
| TP53 | chr17 | 7578257 | C   | A    | E198*     | SNV           | STOP_GAINED           | 1         | C>A     |
| TP53 | chr17 | 7577509 | C   | T    | E258K     | SNV           | NON_SYNONYMOUS_CODING | 1         | C>T     |
| TP53 | chr17 | 7577535 | C   | A    | R249M     | SNV           | NON_SYNONYMOUS_CODING | 1         | C>A     |
| TP53 | chr17 | 7577534 | C   | A    | R249S     | SNV           | NON_SYNONYMOUS_CODING | 7         | C>A     |
| TP53 | chr17 | 7578397 | TG  | T    | -178      | Indel         | FRAME_SHIFT           | 1         | Indel   |
| TP53 | chr17 | 7577114 | C   | T    | C275Y     | SNV           | NON_SYNONYMOUS_CODING | 1         | C>T     |
| TP53 | chr17 | 7577132 | CT  | C    | -269      | Indel         | FRAME_SHIFT           | 1         | Indel   |
| TP53 | chr17 | 7578196 | A   | T    | V218E     | SNV           | NON_SYNONYMOUS_CODING | 1         | A>T     |
| TP53 | chr17 | 7577610 | T   | A    |           | Indel         | SPLICE_SITE_ACCEPTOR  | 1         | Indel   |
| TP53 | chr17 | 7577120 | C   | T    | R273H     | SNV           | NON_SYNONYMOUS_CODING | 3         | C>T     |
| TP53 | chr17 | 7578515 | T   | C    | K139E     | SNV           | NON_SYNONYMOUS_CODING | 1         | T>C     |
| TP53 | chr17 | 7578526 | C   | G    | C135S     | SNV           | NON_SYNONYMOUS_CODING | 1         | C>G     |
| TP53 | chr17 | 7577550 | C   | A    | G244V     | SNV           | NON_SYNONYMOUS_CODING | 1         | C>A     |
| TP53 | chr17 | 7578271 | T   | A    | H193L     | SNV           | NON_SYNONYMOUS_CODING | 1         | T>A     |
| TP53 | chr17 | 7577559 | G   | T    | S241Y     | SNV           | NON_SYNONYMOUS_CODING | 1         | G>T     |
| TP53 | chr17 | 7579350 | A   | C    | F113V     | SNV           | NON_SYNONYMOUS_CODING | 1         | A>C     |
| TP53 | chr17 | 7578554 | A   | G    | Y126H     | SNV           | NON_SYNONYMOUS_CODING | 1         | A>G     |
| TP53 | chr17 | 7579528 | C   | CCAT | -53Q?     | Indel         | FRAME_SHIFT           | 1         | Indel   |

|       |       |               |         |    |        |       |                           |   |       |
|-------|-------|---------------|---------|----|--------|-------|---------------------------|---|-------|
|       |       |               |         | TG |        |       |                           |   |       |
| TP53  | chr17 | 7577085       | C       | CT | -284?  | Indel | FRAME_SHIFT               | 1 | Indel |
| TP53  | chr17 | 7578535       | T       | A  | K132M  | SNV   | NON_SYNONYMO<br>US_CODING | 1 | T>A   |
| TP53  | chr17 | 7577501       | GG<br>A | G  | -260   | Indel | FRAME_SHIFT               | 1 | Indel |
| TP53  | chr17 | 7577550       | C       | T  | G244D  | SNV   | NON_SYNONYMO<br>US_CODING | 1 | C>T   |
| SETD2 | chr3  | 4716237<br>4  | G       | A  | S1251L | SNV   | NON_SYNONYMO<br>US_CODING | 1 | G>A   |
| SETD2 | chr3  | 4712538<br>3  | T       | A  | K1963* | SNV   | STOP_GAINED               | 1 | T>A   |
| SETD2 | chr3  | 4714760<br>5  | G       | T  | T1574N | SNV   | NON_SYNONYMO<br>US_CODING | 1 | G>T   |
| RYR2  | chr1  | 2378805<br>47 | G       | A  | R3456Q | SNV   | NON_SYNONYMO<br>US_CODING | 1 | G>A   |
| RYR2  | chr1  | 2374942<br>69 | A       | T  | R85*   | SNV   | STOP_GAINED               | 1 | A>T   |
| RYR2  | chr1  | 2377777<br>75 | C       | T  | P1781S | SNV   | NON_SYNONYMO<br>US_CODING | 1 | C>T   |
| RYR2  | chr1  | 2378414<br>10 | A       | G  | K2963E | SNV   | NON_SYNONYMO<br>US_CODING | 1 | A>G   |
| RYR1  | chr19 | 3900116<br>8  | A       | C  | K2988T | SNV   | NON_SYNONYMO<br>US_CODING | 1 | A>C   |
| RYR1  | chr19 | 3903449<br>2  | C       | T  | H3997Y | SNV   | NON_SYNONYMO<br>US_CODING | 1 | C>T   |
| RYR1  | chr19 | 3905203<br>3  | G       | T  | R4188L | SNV   | NON_SYNONYMO<br>US_CODING | 1 | G>T   |
| RPTOR | chr17 | 7879603<br>0  | C       | T  | T307M  | SNV   | NON_SYNONYMO<br>US_CODING | 1 | C>T   |
| RPTOR | chr17 | 7889746<br>5  | C       | A  | P934T  | SNV   | NON_SYNONYMO<br>US_CODING | 1 | C>A   |
| RPTOR | chr17 | 7892107<br>6  | A       | T  | N1064Y | SNV   | NON_SYNONYMO<br>US_CODING | 1 | A>T   |
| RB1   | chr13 | 4894753<br>9  | A       | G  |        | Indel | SPLICE_SITE_ACC<br>EPTOR  | 1 | Indel |
| RB1   | chr13 | 4894169       | AT      | A  | -336   | Indel | FRAME_SHIFT               | 1 | Indel |

|         |       |               |                |    |        |       |                           |   |       |
|---------|-------|---------------|----------------|----|--------|-------|---------------------------|---|-------|
|         |       | 5             |                |    |        |       |                           |   |       |
| RB1     | chr13 | 4895557<br>2  | G              | C  | W563S  | SNV   | NON_SYNONYMO<br>US_CODING | 1 | G>C   |
| PSIP1   | chr9  | 1549011<br>3  | T              | TA | -53?   | Indel | FRAME_SHIFT               | 2 | Indel |
| PSIP1   | chr9  | 1549004<br>5  | CC<br>TT<br>TT | C  | -74    | Indel | FRAME_SHIFT               | 3 | Indel |
| PRKDC   | chr8  | 4876526<br>6  | G              | C  | L2324V | SNV   | NON_SYNONYMO<br>US_CODING | 1 | G>C   |
| PRKDC   | chr8  | 4876669<br>9  | C              | G  | V2279L | SNV   | NON_SYNONYMO<br>US_CODING | 1 | C>G   |
| PRKDC   | chr8  | 4880576<br>3  | C              | T  | A1261T | SNV   | NON_SYNONYMO<br>US_CODING | 1 | C>T   |
| PML     | chr15 | 7431519<br>5  | C              | A  | P210Q  | SNV   | NON_SYNONYMO<br>US_CODING | 1 | C>A   |
| PML     | chr15 | 7433731<br>1  | G              | T  | G871C  | SNV   | NON_SYNONYMO<br>US_CODING | 1 | G>T   |
| PML     | chr15 | 7431537<br>4  | C              | T  | R270C  | SNV   | NON_SYNONYMO<br>US_CODING | 1 | C>T   |
| PKHD1   | chr6  | 5173273<br>1  | T              | A  | S2555C | SNV   | NON_SYNONYMO<br>US_CODING | 1 | T>A   |
| PKHD1   | chr6  | 5177114<br>0  | T              | C  |        | Indel | SPLICE_SITE_ACC<br>EPTOR  | 1 | Indel |
| PKHD1   | chr6  | 5193083<br>3  | C              | A  | R274I  | SNV   | NON_SYNONYMO<br>US_CODING | 1 | C>A   |
| PIK3CA  | chr3  | 1789169<br>36 | G              | A  | R108H  | SNV   | NON_SYNONYMO<br>US_CODING | 1 | G>A   |
| PIK3CA  | chr3  | 1789521<br>50 | TG<br>AA<br>AA | T  | -1069  | Indel | FRAME_SHIFT               | 1 | Indel |
| PIK3CA  | chr3  | 1789167<br>13 | T              | G  | L34V   | SNV   | NON_SYNONYMO<br>US_CODING | 1 | T>G   |
| PDE4DIP | chr1  | 1448666<br>78 | C              | A  | R1991L | SNV   | NON_SYNONYMO<br>US_CODING | 1 | C>A   |
| PDE4DIP | chr1  | 1449165<br>77 | T              | A  | E730V  | SNV   | NON_SYNONYMO<br>US_CODING | 2 | T>A   |



|         |       |               |    |    |        |       |                           |   |       |
|---------|-------|---------------|----|----|--------|-------|---------------------------|---|-------|
| PDE4DIP | chr1  | 1450211<br>50 | T  | C  | D84G   | SNV   | NON_SYNONYMO<br>US_CODING | 2 | T>C   |
| NFE2L2  | chr2  | 1780988<br>16 | C  | G  | D77H   | SNV   | NON_SYNONYMO<br>US_CODING | 1 | C>G   |
| NFE2L2  | chr2  | 1780989<br>54 | C  | T  | G31R   | SNV   | NON_SYNONYMO<br>US_CODING | 1 | C>T   |
| NFE2L2  | chr2  | 1780989<br>53 | C  | A  | G31V   | SNV   | NON_SYNONYMO<br>US_CODING | 1 | C>A   |
| NFE2L2  | chr2  | 1780987<br>99 | T  | A  | E82D   | SNV   | NON_SYNONYMO<br>US_CODING | 1 | T>A   |
| NFE2L2  | chr2  | 1780989<br>59 | T  | A  | D29V   | SNV   | NON_SYNONYMO<br>US_CODING | 1 | T>A   |
| KIF1B   | chr1  | 1039759<br>2  | G  | A  |        | Indel | SPLICE_SITE_DON<br>OR     | 1 | Indel |
| KIF1B   | chr1  | 1043127<br>4  | A  | G  | T1634A | SNV   | NON_SYNONYMO<br>US_CODING | 1 | A>G   |
| KIF1B   | chr1  | 1029241<br>1  | G  | A  | A9T    | SNV   | NON_SYNONYMO<br>US_CODING | 1 | G>A   |
| KEAP1   | chr19 | 1060286<br>6  | T  | G  | N238H  | SNV   | NON_SYNONYMO<br>US_CODING | 1 | T>G   |
| KEAP1   | chr19 | 1060239<br>1  | T  | TA | -396?  | Indel | FRAME_SHIFT               | 1 | Indel |
| KEAP1   | chr19 | 1060044<br>6  | C  | T  | R470H  | SNV   | NON_SYNONYMO<br>US_CODING | 1 | C>T   |
| KDR     | chr4  | 5598485<br>2  | C  | A  | V93L   | SNV   | NON_SYNONYMO<br>US_CODING | 1 | C>A   |
| KDR     | chr4  | 5597955<br>1  | CG | C  | -299   | Indel | FRAME_SHIFT               | 1 | Indel |
| KDR     | chr4  | 5597115<br>2  | C  | T  |        | Indel | SPLICE_SITE_ACC<br>EPTOR  | 1 | Indel |
| GRM8    | chr7  | 1268831<br>37 | C  | T  | R41Q   | SNV   | NON_SYNONYMO<br>US_CODING | 1 | C>T   |
| GRM8    | chr7  | 1261730<br>88 | A  | G  | I783T  | SNV   | NON_SYNONYMO<br>US_CODING | 3 | A>G   |
| CUL2    | chr10 | 3530085<br>9  | C  | T  | D694N  | SNV   | NON_SYNONYMO<br>US_CODING | 1 | C>T   |

|        |       |           |                                                                                                            |   |                  |       |                       |   |       |
|--------|-------|-----------|------------------------------------------------------------------------------------------------------------|---|------------------|-------|-----------------------|---|-------|
| CUL2   | chr10 | 35314123  | C                                                                                                          | A | E560*            | SNV   | STOP_GAINED           | 4 | C>A   |
| CTNNB1 | chr3  | 41266124  | A                                                                                                          | G | T41A             | SNV   | NON_SYNONYMOUS_CODING | 3 | A>G   |
| CTNNB1 | chr3  | 41266100  | T                                                                                                          | C | S33P             | SNV   | NON_SYNONYMOUS_CODING | 2 | T>C   |
| CTNNB1 | chr3  | 41266113  | C                                                                                                          | G | S37C             | SNV   | NON_SYNONYMOUS_CODING | 1 | C>G   |
| CTNNB1 | chr3  | 41266104  | G<br>A<br>T<br>C<br>C<br>A<br>T<br>T<br>G<br>G<br>T<br>G<br>C<br>C<br>A<br>C<br>T<br>A<br>C<br>C<br>A<br>C | G | GIHSGA<br>TTT34G | Indel | CODON_DELETION        | 1 | Indel |
| CTNNB1 | chr3  | 41266137  | C                                                                                                          | T | S45F             | SNV   | NON_SYNONYMOUS_CODING | 2 | C>T   |
| CTNNB1 | chr3  | 41266097  | G                                                                                                          | C | D32H             | SNV   | NON_SYNONYMOUS_CODING | 3 | G>C   |
| CTNNB1 | chr3  | 41266097  | G                                                                                                          | T | D32Y             | SNV   | NON_SYNONYMOUS_CODING | 1 | G>T   |
| CTNNB1 | chr3  | 41266098  | A                                                                                                          | G | D32G             | SNV   | NON_SYNONYMOUS_CODING | 1 | A>G   |
| CSMD3  | chr8  | 113504810 | G                                                                                                          | T | A1729D           | SNV   | NON_SYNONYMOUS_CODING | 1 | G>T   |
| CSMD3  | chr8  | 114448950 | G                                                                                                          | C | T45R             | SNV   | NON_SYNONYMOUS_CODING | 1 | G>C   |
| CSMD3  | chr8  | 113702205 | G                                                                                                          | A | R683C            | SNV   | NON_SYNONYMOUS_CODING | 1 | G>A   |
| CSMD3  | chr8  | 113933964 | G                                                                                                          | A | Q509*            | SNV   | STOP_GAINED           | 1 | G>A   |
| CSMD3  | chr8  | 113871409 | A                                                                                                          | G | C574R            | SNV   | NON_SYNONYMOUS_CODING | 2 | A>G   |

|        |       |               |                           |               |        |       |                           |   |       |
|--------|-------|---------------|---------------------------|---------------|--------|-------|---------------------------|---|-------|
| CSMD3  | chr8  | 1133958<br>77 | A                         | T             | F1984I | SNV   | NON_SYNONYMO<br>US_CODING | 1 | A>T   |
| AXIN1  | chr16 | 396446        | C                         | A             | E194*  | SNV   | STOP_GAINED               | 1 | C>A   |
| AXIN1  | chr16 | 343603        | G                         | A             | Q691*  | SNV   | STOP_GAINED               | 1 | G>A   |
| AXIN1  | chr16 | 347107        | C                         | T             | W635*  | SNV   | STOP_GAINED               | 1 | C>T   |
| AXIN1  | chr16 | 359972        | C                         | T             |        | Indel | SPLICE_SITE_DON<br>OR     | 1 | Indel |
| AXIN1  | chr16 | 354428        | AC                        | A             | -377   | Indel | FRAME_SHIFT               | 1 | Indel |
| ASXL1  | chr20 | 3102070<br>0  | A                         | T             | M333L  | SNV   | NON_SYNONYMO<br>US_CODING | 1 | A>T   |
| ASXL1  | chr20 | 3102476<br>4  | C                         | A             | P1417T | SNV   | NON_SYNONYMO<br>US_CODING | 1 | C>A   |
| ASXL1  | chr20 | 3102150<br>2  | T                         | A             | S501T  | SNV   | NON_SYNONYMO<br>US_CODING | 1 | T>A   |
| ARID2  | chr12 | 4623074<br>8  | G                         | T             | D333Y  | SNV   | NON_SYNONYMO<br>US_CODING | 1 | G>T   |
| ARID2  | chr12 | 4624583<br>7  | A                         | T             | K1311* | SNV   | STOP_GAINED               | 1 | A>T   |
| ARID2  | chr12 | 4624445<br>3  | A                         | AC            | -850?  | Indel | FRAME_SHIFT               | 1 | Indel |
| ARID2  | chr12 | 4623320<br>7  | C                         | CT            | -476?  | Indel | FRAME_SHIFT               | 1 | Indel |
| ARID2  | chr12 | 4624426<br>2  | G                         | T             | G786C  | SNV   | NON_SYNONYMO<br>US_CODING | 1 | G>T   |
| ARID2  | chr12 | 4624528<br>8  | C                         | T             | Q1128* | SNV   | STOP_GAINED               | 1 | C>T   |
| ARID2  | chr12 | 4623113<br>5  | C                         | CT<br>CA<br>A | -352S? | Indel | FRAME_SHIFT               | 1 | Indel |
| ARID2  | chr12 | 4624629<br>9  | CC<br>AA<br>GT<br>GT<br>A | C             | -1465  | Indel | FRAME_SHIFT               | 1 | Indel |
| ARID2  | chr12 | 4623321<br>9  | G                         | T             | E480*  | SNV   | STOP_GAINED               | 1 | G>T   |
| ARID1A | chr1  | 2709765<br>8  | G                         | T             | G1083C | SNV   | NON_SYNONYMO<br>US_CODING | 1 | G>T   |
| ARID1A | chr1  | 2710705<br>9  | G                         | T             | E2224* | SNV   | STOP_GAINED               | 1 | G>T   |
| ARID1A | chr1  | 2709427<br>9  | A                         | T             |        | Indel | SPLICE_SITE_ACC<br>EPTOR  | 1 | Indel |
| ARID1A | chr1  | 2710702<br>3  | C                         | T             | Q2212* | SNV   | STOP_GAINED               | 1 | C>T   |
| ARID1A | chr1  | 2709994       | C                         | T             | R1276* | SNV   | STOP_GAINED               | 2 | C>T   |

|        |      |           |                                                                                  |    |                    |       |                       |   |       |
|--------|------|-----------|----------------------------------------------------------------------------------|----|--------------------|-------|-----------------------|---|-------|
|        |      | 7         |                                                                                  |    |                    |       |                       |   |       |
| ARID1A | chr1 | 27106803  | AC                                                                               | A  | -2139              | Indel | FRAME_SHIFT           | 2 | Indel |
| ARID1A | chr1 | 27105841  | C                                                                                | T  | Q1818*             | SNV   | STOP_GAINED           | 1 | C>T   |
| ARID1A | chr1 | 27105756  | C                                                                                | CT | -1790?             | Indel | FRAME_SHIFT           | 1 | Indel |
| ARID1A | chr1 | 27105774  | GC                                                                               | G  | -1796              | Indel | FRAME_SHIFT           | 1 | Indel |
| APOB   | chr2 | 21232728  | T                                                                                | A  | R2338*             | SNV   | STOP_GAINED           | 1 | T>A   |
| APOB   | chr2 | 21258549  | C                                                                                | A  | S242I              | SNV   | NON_SYNONYMOUS_CODING | 1 | C>A   |
| APOB   | chr2 | 21233884  | ATG                                                                              | A  | -1952              | Indel | FRAME_SHIFT           | 1 | Indel |
| APOB   | chr2 | 21224995  | AG<br>TA<br>AA<br>GT<br>TA<br>GA<br>GG<br>CA<br>CT<br>GA<br>C                    | A  | -4427              | Indel | FRAME_SHIFT           | 1 | Indel |
| APOB   | chr2 | 21234944  | C                                                                                | T  | R1599H             | SNV   | NON_SYNONYMOUS_CODING | 1 | C>T   |
| APOB   | chr2 | 21235067  | G                                                                                | C  | T1558S             | SNV   | NON_SYNONYMOUS_CODING | 1 | G>C   |
| APOB   | chr2 | 21232800  | GA<br>AT<br>GT<br>CA<br>TT<br>TA<br>TT<br>CT<br>TT<br>CA<br>AA<br>TG<br>AA<br>AT | G  | ISFERIN<br>DI2305- | Indel | CODON_DELETION        | 1 | Indel |
| ACVR2A | chr2 | 148683685 | TA                                                                               | T  | -435               | Indel | FRAME_SHIFT           | 3 | Indel |
| ACVR2A | chr2 | 148680560 | A                                                                                | G  | M366V              | SNV   | NON_SYNONYMOUS_CODING | 1 | A>G   |



**Table S10. Recurrently mutated genes in Thai iCCA**

| Gene  | Chr.  | POS      | REF                                         | ALT | AA Change | Mutation.Type | Effect                | var.freq | snp.alt |
|-------|-------|----------|---------------------------------------------|-----|-----------|---------------|-----------------------|----------|---------|
| USP9X | chrX  | 41075689 | G                                           | A   | D1957N    | SNV           | NON_SYNONYMOUS_CODING | 1        | G>A     |
| USP9X | chrX  | 41010177 | C                                           | T   | R544C     | SNV           | NON_SYNONYMOUS_CODING | 1        | C>T     |
| USP9X | chrX  | 41057909 | ATTA<br>C                                   | A   | -1504     | Indel         | FRAME_SHIFT           | 1        | In del  |
| USP9X | chrX  | 41073850 | T                                           | G   | L1740R    | SNV           | NON_SYNONYMOUS_CODING | 1        | T>G     |
| TP53  | chr17 | 7590693  | A                                           | T   |           | Indel         | SPLICE_SITE_DONOR     | 1        | In del  |
| TP53  | chr17 | 7577524  | T                                           | C   | T253A     | SNV           | NON_SYNONYMOUS_CODING | 1        | T>C     |
| TP53  | chr17 | 7577022  | G                                           | A   | R306*     | SNV           | STOP_GAINED           | 2        | G>A     |
| TP53  | chr17 | 7577534  | C                                           | A   | R249S     | SNV           | NON_SYNONYMOUS_CODING | 7        | C>A     |
| TP53  | chr17 | 7577566  | T                                           | C   | N239D     | SNV           | NON_SYNONYMOUS_CODING | 1        | T>C     |
| TP53  | chr17 | 7577548  | C                                           | T   | G245S     | SNV           | NON_SYNONYMOUS_CODING | 1        | C>T     |
| TP53  | chr17 | 7578406  | C                                           | T   | R175H     | SNV           | NON_SYNONYMOUS_CODING | 2        | C>T     |
| TP53  | chr17 | 7590692  | T                                           | TA  |           | Indel         | SPLICE_SITE_DONOR     | 1        | In del  |
| TP53  | chr17 | 7577118  | C                                           | A   | V274F     | SNV           | NON_SYNONYMOUS_CODING | 1        | C>A     |
| TP53  | chr17 | 7577094  | G                                           | A   | R282W     | SNV           | NON_SYNONYMOUS_CODING | 2        | G>A     |
| TP53  | chr17 | 7577112  | C                                           | G   | A276P     | SNV           | NON_SYNONYMOUS_CODING | 1        | C>G     |
| TP53  | chr17 | 7577120  | C                                           | T   | R273H     | SNV           | NON_SYNONYMOUS_CODING | 3        | C>T     |
| TP53  | chr17 | 7579554  | GC<br>AT<br>CA<br>AA<br>TC<br>AT<br>CC<br>A | G   | -40       | Indel         | FRAME_SHIFT           | 1        | In del  |
| TP53  | chr17 | 7578496  | A                                           | T   | L145Q     | SNV           | NON_SYNONYMOUS_CODING | 1        | A>T     |
| TP53  | chr17 | 7578518  | C                                           | G   | A138P     | SNV           | NON_SYNONYMOUS_CODING | 1        | C>G     |
| TP53  | chr17 | 7578520  | A                                           | T   | L137Q     | SNV           | NON_SYNONYMOUS_CODING | 1        | A>T     |

|         |       |           |                     |                   |             |       |                                  |   |        |
|---------|-------|-----------|---------------------|-------------------|-------------|-------|----------------------------------|---|--------|
| TP53    | chr17 | 7577547   | C                   | A                 | G245V       | SNV   | NON_SYNONYMOUS_CODING            | 1 | C>A    |
| TP53    | chr17 | 7578431   | G                   | A                 | Q167*       | SNV   | STOP_GAINED                      | 1 | G>A    |
| TP53    | chr17 | 7577538   | C                   | T                 | R248Q       | SNV   | NON_SYNONYMOUS_CODING            | 3 | C>T    |
| TP53    | chr17 | 7577599   | C                   | CA                | -227?       | Indel | FRAME_SHIFT                      | 1 | In del |
| TP53    | chr17 | 7577115   | A                   | C                 | C275G       | SNV   | NON_SYNONYMOUS_CODING            | 1 | A>C    |
| TP53    | chr17 | 7577057   | TC                  | T                 | -294        | Indel | FRAME_SHIFT                      | 1 | In del |
| TP53    | chr17 | 7578176   | C                   | T                 |             | Indel | SPLICE_SITE_DONOR                | 1 | In del |
| TP53    | chr17 | 7578413   | C                   | A                 | V173L       | SNV   | NON_SYNONYMOUS_CODING            | 1 | C>A    |
| TP53    | chr17 | 7579359   | G                   | GGA<br>AAC<br>CGT | -<br>109TV? | Indel | FRAME_SHIFT                      | 1 | In del |
| TP53    | chr17 | 7576870   | C                   | A                 | E326*       | SNV   | STOP_GAINED                      | 1 | C>A    |
| TP53    | chr17 | 7578212   | G                   | A                 | R213*       | SNV   | STOP_GAINED                      | 1 | G>A    |
| TP53    | chr17 | 7578410   | T                   | A                 | R174W       | SNV   | NON_SYNONYMOUS_CODING            | 1 | T>A    |
| TP53    | chr17 | 7577124   | C                   | T                 | V272M       | SNV   | NON_SYNONYMOUS_CODING            | 1 | C>T    |
| TP53    | chr17 | 7578263   | G                   | A                 | R196*       | SNV   | STOP_GAINED                      | 1 | G>A    |
| TP53    | chr17 | 7576896   | TG                  | T                 | -317        | Indel | FRAME_SHIFT                      | 1 | In del |
| TP53    | chr17 | 7579343   | T                   | C                 | H115R       | SNV   | NON_SYNONYMOUS_CODING            | 1 | T>C    |
| TP53    | chr17 | 7579373   | C                   | A                 | G105V       | SNV   | NON_SYNONYMOUS_CODING            | 1 | C>A    |
| TP53    | chr17 | 7579854   | GA                  | G                 | -20         | Indel | FRAME_SHIFT                      | 1 | In del |
| TP53    | chr17 | 7574018   | G                   | A                 | R337C       | SNV   | NON_SYNONYMOUS_CODING            | 1 | G>A    |
| TP53    | chr17 | 7578262   | C                   | G                 | R196P       | SNV   | NON_SYNONYMOUS_CODING            | 1 | C>G    |
| TP53    | chr17 | 7577099   | C                   | G                 | R280T       | SNV   | NON_SYNONYMOUS_CODING            | 1 | C>G    |
| TGFB R1 | chr9  | 101904946 | G                   | A                 | G316S       | SNV   | NON_SYNONYMOUS_CODING            | 1 | G>A    |
| TGFB R1 | chr9  | 101891287 | C                   | T                 | P83L        | SNV   | NON_SYNONYMOUS_CODING            | 1 | C>T    |
| TGFB R1 | chr9  | 101891136 | GC<br>GT<br>TA<br>C | G                 | ALQ33<br>E  | Indel | CODON_CHANGE_PLUS_CODON_DELETION | 1 | In del |

|        |       |           |                            |    |              |       |                                  |   |        |
|--------|-------|-----------|----------------------------|----|--------------|-------|----------------------------------|---|--------|
| SYN E1 | chr6  | 152651967 | A                          | C  | L4618R       | SNV   | NON_SYNONYMOUS_CODING            | 1 | A>C    |
| SYN E1 | chr6  | 152651058 | T                          | C  | Q4921R       | SNV   | NON_SYNONYMOUS_CODING            | 1 | T>C    |
| SYN E1 | chr6  | 152527476 | G                          | A  | R7616W       | SNV   | NON_SYNONYMOUS_CODING            | 1 | G>A    |
| SYN E1 | chr6  | 152485406 | C                          | T  | M7894I       | SNV   | NON_SYNONYMOUS_CODING            | 1 | C>T    |
| SYN E1 | chr6  | 152555825 | C                          | T  | R6836H       | SNV   | NON_SYNONYMOUS_CODING            | 1 | C>T    |
| SYN E1 | chr6  | 152599315 | T                          | G  | E6161A       | SNV   | NON_SYNONYMOUS_CODING            | 1 | T>G    |
| SYN E1 | chr6  | 152765644 | C                          | A  | E1247*       | SNV   | STOP_GAINED                      | 1 | C>A    |
| STK11  | chr19 | 1207033   | AA<br>GC<br>G              | A  | -41          | Indel | FRAME_SHIFT                      | 1 | In del |
| STK11  | chr19 | 1221995   | C                          | T  | R304W        | SNV   | NON_SYNONYMOUS_CODING            | 1 | C>T    |
| STK11  | chr19 | 1220487   | G                          | A  | D194N        | SNV   | NON_SYNONYMOUS_CODING            | 1 | G>A    |
| STK11  | chr19 | 1207054   | A                          | T  | K48*         | SNV   | STOP_GAINED                      | 1 | A>T    |
| STA G1 | chr3  | 136191310 | C                          | G  | D384H        | SNV   | NON_SYNONYMOUS_CODING            | 1 | C>G    |
| STA G1 | chr3  | 136221548 | T                          | A  | Q250H        | SNV   | NON_SYNONYMOUS_CODING            | 1 | T>A    |
| STA G1 | chr3  | 136342005 | G                          | A  | R39C         | SNV   | NON_SYNONYMOUS_CODING            | 1 | G>A    |
| SRC    | chr20 | 36031729  | G                          | T  | E526*        | SNV   | STOP_GAINED                      | 1 | G>T    |
| SRC    | chr20 | 36014513  | G                          | A  | E96K         | SNV   | NON_SYNONYMOUS_CODING            | 1 | G>A    |
| SRC    | chr20 | 36031750  | G                          | A  | E533K        | SNV   | NON_SYNONYMOUS_CODING            | 1 | G>A    |
| SMA D4 | chr18 | 48593406  | G                          | A  | G386D        | SNV   | NON_SYNONYMOUS_CODING            | 1 | G>A    |
| SMA D4 | chr18 | 48591880  | TT<br>AC<br>TG<br>TT<br>GA | T  | VTVD3<br>48V | Indel | CODON_DELETION                   | 1 | In del |
| SMA D4 | chr18 | 48591898  | T                          | G  | V354G        | SNV   | NON_SYNONYMOUS_CODING            | 1 | T>G    |
| SMA D4 | chr18 | 48591918  | C                          | T  | R361C        | SNV   | NON_SYNONYMOUS_CODING            | 4 | C>T    |
| SMA D4 | chr18 | 48604764  | T                          | TA | -529?        | Indel | FRAME_SHIFT                      | 1 | In del |
| SMA D4 | chr18 | 48591910  | GA<br>GG<br>AG             | G  | GGD35<br>8G  | Indel | CODON_CHANGE_PLUS_CODON_DELETION | 1 | In del |



|             |       |           |    |   |        |       |                           |   |           |
|-------------|-------|-----------|----|---|--------|-------|---------------------------|---|-----------|
|             |       |           | A  |   |        |       |                           |   |           |
| SMA<br>D4   | chr18 | 48604750  | G  | T | W524C  | SNV   | NON_SYNONYMOUS<br>_CODING | 1 | G><br>T   |
| SMA<br>D4   | chr18 | 48584497  | C  | T | Q224*  | SNV   | STOP_GAINED               | 1 | C><br>T   |
| SMA<br>D4   | chr18 | 48575219  | C  | G | S138*  | SNV   | STOP_GAINED               | 1 | C><br>G   |
| SMA<br>D4   | chr18 | 48593531  | A  | T | K428*  | SNV   | STOP_GAINED               | 1 | A><br>T   |
| SMA<br>D4   | chr18 | 48584593  | C  | T | Q256*  | SNV   | STOP_GAINED               | 1 | C><br>T   |
| SMA<br>D4   | chr18 | 48573528  | A  | T | R38*   | SNV   | STOP_GAINED               | 1 | A><br>T   |
| SMA<br>D4   | chr18 | 48584513  | TG | T | -229   | Indel | FRAME_SHIFT               | 1 | In<br>del |
| SCN5<br>A   | chr3  | 38608045  | C  | T | R1232Q | SNV   | NON_SYNONYMOUS<br>_CODING | 1 | C><br>T   |
| SCN5<br>A   | chr3  | 38640457  | G  | A | R659W  | SNV   | NON_SYNONYMOUS<br>_CODING | 1 | G><br>A   |
| SCN5<br>A   | chr3  | 38603943  | C  | T | R1309H | SNV   | NON_SYNONYMOUS<br>_CODING | 1 | C><br>T   |
| SCN5<br>A   | chr3  | 38647567  | C  | T | V405M  | SNV   | NON_SYNONYMOUS<br>_CODING | 1 | C><br>T   |
| RYR2        | chr1  | 237969498 | T  | C | F4744S | SNV   | NON_SYNONYMOUS<br>_CODING | 1 | T><br>C   |
| RYR2        | chr1  | 237804248 | G  | A | M2387I | SNV   | NON_SYNONYMOUS<br>_CODING | 1 | G><br>A   |
| RYR2        | chr1  | 237850754 | GC | G | -3004  | Indel | FRAME_SHIFT               | 1 | In<br>del |
| RYR2        | chr1  | 237868562 | C  | T | P3165S | SNV   | NON_SYNONYMOUS<br>_CODING | 3 | C><br>T   |
| RYR2        | chr1  | 237670041 | G  | C | R880T  | SNV   | NON_SYNONYMOUS<br>_CODING | 1 | G><br>C   |
| RYR2        | chr1  | 237580409 | G  | C | E276D  | SNV   | NON_SYNONYMOUS<br>_CODING | 1 | G><br>C   |
| RYR2        | chr1  | 237755097 | G  | T | E1405* | SNV   | STOP_GAINED               | 1 | G><br>T   |
| RYR1        | chr19 | 38934854  | G  | T | V164F  | SNV   | NON_SYNONYMOUS<br>_CODING | 1 | G><br>T   |
| RYR1        | chr19 | 38979850  | CA | C | -1861  | Indel | FRAME_SHIFT               | 1 | In<br>del |
| RYR1        | chr19 | 38949797  | C  | T | R727C  | SNV   | NON_SYNONYMOUS<br>_CODING | 1 | C><br>T   |
| RYR1        | chr19 | 38998374  | G  | A | D2947N | SNV   | NON_SYNONYMOUS<br>_CODING | 1 | G><br>A   |
| RUN<br>X1T1 | chr8  | 92998513  | C  | T | R384Q  | SNV   | NON_SYNONYMOUS<br>_CODING | 1 | C><br>T   |
| RUN<br>X1T1 | chr8  | 93029565  | G  | A | P50S   | SNV   | NON_SYNONYMOUS<br>_CODING | 1 | G><br>A   |
| RUN         | chr8  | 93004062  | G  | A | R277*  | SNV   | STOP_GAINED               | 1 | G>        |

|             |       |           |                |   |        |       |                           |   |           |
|-------------|-------|-----------|----------------|---|--------|-------|---------------------------|---|-----------|
| X1T1        |       |           |                |   |        |       |                           |   | A         |
| RUN<br>X1T1 | chr8  | 92982983  | G              | A | T492I  | SNV   | NON_SYNONYMOUS<br>_CODING | 1 | G><br>A   |
| RNF4<br>3   | chr17 | 56436140  | G              | A | Q333*  | SNV   | STOP_GAINED               | 1 | G><br>A   |
| RNF4<br>3   | chr17 | 56492739  | C              | T | G67D   | SNV   | NON_SYNONYMOUS<br>_CODING | 1 | C><br>T   |
| RNF4<br>3   | chr17 | 56440741  | C              | T | W159*  | SNV   | STOP_GAINED               | 1 | C><br>T   |
| RNF4<br>3   | chr17 | 56438222  | AC<br>CC<br>CG | A | -256   | Indel | FRAME_SHIFT               | 1 | In<br>del |
| RNF4<br>3   | chr17 | 56437534  | G              | T | P310T  | SNV   | NON_SYNONYMOUS<br>_CODING | 1 | G><br>T   |
| PTPR<br>D   | chr9  | 8636761   | C              | G | D50H   | SNV   | NON_SYNONYMOUS<br>_CODING | 1 | C><br>G   |
| PTPR<br>D   | chr9  | 8633407   | G              | A | R88W   | SNV   | NON_SYNONYMOUS<br>_CODING | 1 | G><br>A   |
| PTPR<br>D   | chr9  | 8460493   | C              | T | E1265K | SNV   | NON_SYNONYMOUS<br>_CODING | 1 | C><br>T   |
| PSIP1       | chr9  | 15490045  | CC<br>TTT<br>T | C | -74    | Indel | FRAME_SHIFT               | 3 | In<br>del |
| PSIP1       | chr9  | 15490113  | TA             | T | -53    | Indel | FRAME_SHIFT               | 1 | In<br>del |
| PSIP1       | chr9  | 15469290  | T              | A | K360*  | SNV   | STOP_GAINED               | 1 | T><br>A   |
| PSIP1       | chr9  | 15506572  | C              | A | G46*   | SNV   | STOP_GAINED               | 1 | C><br>A   |
| PSIP1       | chr9  | 15472749  | C              | A |        | Indel | SPLICE_SITE_ACCEP<br>TOR  | 1 | In<br>del |
| PRK<br>DC   | chr8  | 48830924  | C              | T | W813*  | SNV   | STOP_GAINED               | 1 | C><br>T   |
| PRK<br>DC   | chr8  | 48749959  | C              | T | W2524* | SNV   | STOP_GAINED               | 1 | C><br>T   |
| PRK<br>DC   | chr8  | 48713478  | C              | T | G3330D | SNV   | NON_SYNONYMOUS<br>_CODING | 1 | C><br>T   |
| PRK<br>DC   | chr8  | 48817428  | C              | G |        | Indel | SPLICE_SITE_DONOR         | 1 | In<br>del |
| PRK<br>DC   | chr8  | 48848395  | C              | A | Q448H  | SNV   | NON_SYNONYMOUS<br>_CODING | 1 | C><br>A   |
| PRK<br>DC   | chr8  | 48811031  | G              | A | R1155* | SNV   | STOP_GAINED               | 1 | G><br>A   |
| PIK3<br>CA  | chr3  | 178936091 | G              | A | E545K  | SNV   | NON_SYNONYMOUS<br>_CODING | 1 | G><br>A   |
| PIK3<br>CA  | chr3  | 178921553 | T              | A | N345K  | SNV   | NON_SYNONYMOUS<br>_CODING | 2 | T><br>A   |
| PIK3<br>CA  | chr3  | 178943780 | T              | G | I816S  | SNV   | NON_SYNONYMOUS<br>_CODING | 1 | T><br>G   |
| PIK3<br>CA  | chr3  | 178952085 | A              | G | H1047R | SNV   | NON_SYNONYMOUS<br>_CODING | 1 | A><br>G   |

|         |       |           |                            |    |             |       |                           |   |           |
|---------|-------|-----------|----------------------------|----|-------------|-------|---------------------------|---|-----------|
| PBR M1  | chr3  | 52584801  | CT<br>AC<br>CA<br>TA       | C  | -1545       | Indel | FRAME_SHIFT               | 1 | In<br>del |
| PBR M1  | chr3  | 52682399  | A                          | AT | -258?       | Indel | FRAME_SHIFT               | 2 | In<br>del |
| PBR M1  | chr3  | 52643328  | C                          | A  |             | Indel | SPLICE_SITE_DONOR         | 1 | In<br>del |
| PBR M1  | chr3  | 52682407  | CG<br>AG                   | C  | L255-       | Indel | CODON_DELETION            | 1 | In<br>del |
| NF1     | chr17 | 29684326  | C                          | T  | R2637*      | SNV   | STOP_GAINED               | 1 | C><br>T   |
| NF1     | chr17 | 29554310  | G                          | C  |             | Indel | SPLICE_SITE_DONOR         | 1 | In<br>del |
| NF1     | chr17 | 29486094  | G                          | GA | -91?        | Indel | FRAME_SHIFT               | 1 | In<br>del |
| NF1     | chr17 | 29652920  | G                          | T  | E1640*      | SNV   | STOP_GAINED               | 1 | G><br>T   |
| NF1     | chr17 | 29657433  | C                          | CT | -1910?      | Indel | FRAME_SHIFT               | 1 | In<br>del |
| NF1     | chr17 | 29663350  | G                          | A  |             | Indel | SPLICE_SITE_ACCEP<br>TOR  | 1 | In<br>del |
| MYH 11  | chr16 | 15815482  | C                          | T  | E1466K      | SNV   | NON_SYNONYMOUS<br>_CODING | 1 | C><br>T   |
| MYH 11  | chr16 | 15932094  | G                          | A  | Q6*         | SNV   | STOP_GAINED               | 1 | G><br>A   |
| MYH 11  | chr16 | 15844174  | C                          | T  | G634S       | SNV   | NON_SYNONYMOUS<br>_CODING | 1 | C><br>T   |
| MAP 2K4 | chr17 | 12028657  | G                          | A  | R298H       | SNV   | NON_SYNONYMOUS<br>_CODING | 1 | G><br>A   |
| MAP 2K4 | chr17 | 12028638  | C                          | T  | R292*       | SNV   | STOP_GAINED               | 1 | C><br>T   |
| MAP 2K4 | chr17 | 12028660  | C                          | T  | S299F       | SNV   | NON_SYNONYMOUS<br>_CODING | 1 | C><br>T   |
| MAP 2K4 | chr17 | 12016634  | C                          | G  | S268C       | SNV   | NON_SYNONYMOUS<br>_CODING | 1 | C><br>G   |
| MAP 2K4 | chr17 | 11984802  | CA<br>AC<br>AA<br>AA<br>TG | C  | NKM12<br>8- | Indel | CODON_DELETION            | 1 | In<br>del |
| LRP1 B  | chr2  | 141143498 | T                          | A  | N3499Y      | SNV   | NON_SYNONYMOUS<br>_CODING | 1 | T><br>A   |
| LRP1 B  | chr2  | 141122280 | TC<br>A                    | T  | -3693       | Indel | FRAME_SHIFT               | 1 | In<br>del |
| LRP1 B  | chr2  | 141214083 | T                          | C  | T3302A      | SNV   | NON_SYNONYMOUS<br>_CODING | 1 | T><br>C   |
| LRP1 B  | chr2  | 140995804 | G                          | T  | P4493T      | SNV   | NON_SYNONYMOUS<br>_CODING | 1 | G><br>T   |
| LRP1 B  | chr2  | 141253256 | T                          | C  | E2971G      | SNV   | NON_SYNONYMOUS<br>_CODING | 1 | T><br>C   |
| LRP1 B  | chr2  | 141264371 | G                          | A  | Q2839*      | SNV   | STOP_GAINED               | 1 | G><br>A   |

|           |       |           |                      |   |        |       |                           |   |           |
|-----------|-------|-----------|----------------------|---|--------|-------|---------------------------|---|-----------|
| LRP1<br>B | chr2  | 141643848 | G                    | C | L1275V | SNV   | NON_SYNONYMOUS<br>_CODING | 1 | G><br>C   |
| LRP1<br>B | chr2  | 141243094 | C                    | A |        | Indel | SPLICE_SITE_ACCEP<br>TOR  | 1 | In<br>del |
| LRP1<br>B | chr2  | 141473551 | G                    | C | P2005R | SNV   | NON_SYNONYMOUS<br>_CODING | 1 | G><br>C   |
| LRP1<br>B | chr2  | 141299411 | G                    | T | L2442I | SNV   | NON_SYNONYMOUS<br>_CODING | 1 | G><br>T   |
| KRA<br>S  | chr12 | 25398284  | C                    | T | G12D   | SNV   | NON_SYNONYMOUS<br>_CODING | 6 | C><br>T   |
| KRA<br>S  | chr12 | 25398284  | C                    | A | G12V   | SNV   | NON_SYNONYMOUS<br>_CODING | 3 | C><br>A   |
| KRA<br>S  | chr12 | 25398285  | C                    | T | G12S   | SNV   | NON_SYNONYMOUS<br>_CODING | 2 | C><br>T   |
| KRA<br>S  | chr12 | 25378562  | C                    | T | A146T  | SNV   | NON_SYNONYMOUS<br>_CODING | 1 | C><br>T   |
| KRA<br>S  | chr12 | 25380275  | T                    | G | Q61H   | SNV   | NON_SYNONYMOUS<br>_CODING | 1 | T><br>G   |
| KRA<br>S  | chr12 | 25398282  | C                    | A | G13C   | SNV   | NON_SYNONYMOUS<br>_CODING | 1 | C><br>A   |
| KRA<br>S  | chr12 | 25398285  | C                    | A | G12C   | SNV   | NON_SYNONYMOUS<br>_CODING | 2 | C><br>A   |
| KRA<br>S  | chr12 | 25398262  | C                    | A | L19F   | SNV   | NON_SYNONYMOUS<br>_CODING | 1 | C><br>A   |
| KRA<br>S  | chr12 | 25398281  | C                    | T | G13D   | SNV   | NON_SYNONYMOUS<br>_CODING | 1 | C><br>T   |
| KMT<br>2C | chr7  | 151874120 | GA<br>GA<br>AC<br>CA | G | -2804  | Indel | FRAME_SHIFT               | 1 | In<br>del |
| KMT<br>2C | chr7  | 152012245 | G                    | A | R190*  | SNV   | STOP_GAINED               | 1 | G><br>A   |
| KMT<br>2C | chr7  | 151949801 | C                    | G |        | Indel | SPLICE_SITE_ACCEP<br>TOR  | 1 | In<br>del |
| KMT<br>2C | chr7  | 151856055 | G                    | A | Q3855* | SNV   | STOP_GAINED               | 1 | G><br>A   |
| KMT<br>2C | chr7  | 151859201 | C                    | A |        | Indel | SPLICE_SITE_DONOR         | 1 | In<br>del |
| KMT<br>2C | chr7  | 151851531 | C                    | T |        | Indel | SPLICE_SITE_ACCEP<br>TOR  | 2 | In<br>del |
| KMT<br>2C | chr7  | 151947040 | T                    | C |        | Indel | SPLICE_SITE_ACCEP<br>TOR  | 1 | In<br>del |
| KMT<br>2C | chr7  | 151879136 | G                    | A | Q1937* | SNV   | STOP_GAINED               | 1 | G><br>A   |
| KMT<br>2C | chr7  | 151845261 | C                    | T | R4641Q | SNV   | NON_SYNONYMOUS<br>_CODING | 1 | C><br>T   |
| KMT<br>2C | chr7  | 151884352 | A                    | C | F1668C | SNV   | NON_SYNONYMOUS<br>_CODING | 1 | A><br>C   |
| KMT<br>2C | chr7  | 151949138 | C                    | A | E503*  | SNV   | STOP_GAINED               | 1 | C><br>A   |

|           |       |           |                            |          |               |       |                                          |   |           |
|-----------|-------|-----------|----------------------------|----------|---------------|-------|------------------------------------------|---|-----------|
| KAT6<br>B | chr10 | 76739051  | G                          | C        | E729Q         | SNV   | NON_SYNONYMOUS<br>_CODING                | 1 | G><br>C   |
| KAT6<br>B | chr10 | 76788859  | C                          | T        | A1426V        | SNV   | NON_SYNONYMOUS<br>_CODING                | 1 | C><br>T   |
| KAT6<br>B | chr10 | 76789762  | A                          | T        | N1727I        | SNV   | NON_SYNONYMOUS<br>_CODING                | 1 | A><br>T   |
| KAT6<br>B | chr10 | 76781905  | G                          | GGA<br>A | -1097E        | Indel | CODON_INSERTION                          | 1 | In<br>del |
| KAT6<br>B | chr10 | 76781905  | GG<br>AA                   | G        | E1097-        | Indel | CODON_DELETION                           | 1 | In<br>del |
| GNA<br>S  | chr20 | 57484421  | G                          | A        | R844H         | SNV   | NON_SYNONYMOUS<br>_CODING                | 6 | G><br>A   |
| GNA<br>S  | chr20 | 57484420  | C                          | T        | R844C         | SNV   | NON_SYNONYMOUS<br>_CODING                | 9 | C><br>T   |
| GNA<br>S  | chr20 | 57428925  | C                          | T        | P202L         | SNV   | NON_SYNONYMOUS<br>_CODING                | 1 | C><br>T   |
| FN1       | chr2  | 216271877 | G                          | C        | Q896E         | SNV   | NON_SYNONYMOUS<br>_CODING                | 1 | G><br>C   |
| FN1       | chr2  | 216284088 | T                          | C        | T566A         | SNV   | NON_SYNONYMOUS<br>_CODING                | 1 | T><br>C   |
| FN1       | chr2  | 216286852 | C                          | G        | R503P         | SNV   | NON_SYNONYMOUS<br>_CODING                | 1 | C><br>G   |
| FN1       | chr2  | 216274397 | C                          | T        | E730K         | SNV   | NON_SYNONYMOUS<br>_CODING                | 1 | C><br>T   |
| FGFR<br>2 | chr10 | 123247514 | C                          | A        | K660N         | SNV   | NON_SYNONYMOUS<br>_CODING                | 1 | C><br>A   |
| FGFR<br>2 | chr10 | 123247516 | T                          | C        | K660E         | SNV   | NON_SYNONYMOUS<br>_CODING                | 1 | T><br>C   |
| FGFR<br>2 | chr10 | 123258034 | A                          | C        | N550K         | SNV   | NON_SYNONYMOUS<br>_CODING                | 1 | A><br>C   |
| FAN<br>CI | chr15 | 89816675  | C                          | A        | T317K         | SNV   | NON_SYNONYMOUS<br>_CODING                | 4 | C><br>A   |
| FAN<br>CI | chr15 | 89816698  | C                          | A        | Q325K         | SNV   | NON_SYNONYMOUS<br>_CODING                | 4 | C><br>A   |
| ERB<br>B4 | chr2  | 212566818 | C                          | T        | A455T         | SNV   | NON_SYNONYMOUS<br>_CODING                | 1 | C><br>T   |
| ERB<br>B4 | chr2  | 212251768 | AG<br>CA<br>CC<br>CT<br>GT | A        | AQGA1<br>094A | Indel | CODON_CHANGE_PL<br>US_CODON_DELETIO<br>N | 1 | In<br>del |
| ERB<br>B4 | chr2  | 212426794 | C                          | A        | S774I         | SNV   | NON_SYNONYMOUS<br>_CODING                | 1 | C><br>A   |
| ERB<br>B4 | chr2  | 212570064 | G                          | A        | R393W         | SNV   | NON_SYNONYMOUS<br>_CODING                | 1 | G><br>A   |
| ERB<br>B3 | chr12 | 56481696  | T                          | C        | F244S         | SNV   | NON_SYNONYMOUS<br>_CODING                | 1 | T><br>C   |
| ERB<br>B3 | chr12 | 56481922  | G                          | A        | G284R         | SNV   | NON_SYNONYMOUS<br>_CODING                | 3 | G><br>A   |

|         |       |           |        |   |        |       |                       |   |        |
|---------|-------|-----------|--------|---|--------|-------|-----------------------|---|--------|
| ERB B3  | chr12 | 56478854  | G      | A | V104M  | SNV   | NON_SYNONYMOUS_CODING | 1 | G>A    |
| ERB B3  | chr12 | 56482537  | G      | A | E332K  | SNV   | NON_SYNONYMOUS_CODING | 1 | G>A    |
| ERB B3  | chr12 | 56482341  | G      | T | D297Y  | SNV   | NON_SYNONYMOUS_CODING | 1 | G>T    |
| ERB B3  | chr12 | 56488249  | C      | T | P590S  | SNV   | NON_SYNONYMOUS_CODING | 1 | C>T    |
| ERB B2  | chr17 | 37868208  | C      | T | S310F  | SNV   | NON_SYNONYMOUS_CODING | 6 | C>T    |
| ERB B2  | chr17 | 37880220  | T      | C | L755S  | SNV   | NON_SYNONYMOUS_CODING | 1 | T>C    |
| ERB B2  | chr17 | 37868208  | C      | A | S310Y  | SNV   | NON_SYNONYMOUS_CODING | 3 | C>A    |
| EPH A6  | chr3  | 97124093  | A      | G | D569G  | SNV   | NON_SYNONYMOUS_CODING | 1 | A>G    |
| EPH A6  | chr3  | 97202892  | T      | C | V730A  | SNV   | NON_SYNONYMOUS_CODING | 1 | T>C    |
| EPH A6  | chr3  | 97251304  | G      | A | R768K  | SNV   | NON_SYNONYMOUS_CODING | 1 | G>A    |
| EP40 0  | chr12 | 132530375 | G      | A | R2413Q | SNV   | NON_SYNONYMOUS_CODING | 1 | G>A    |
| EP40 0  | chr12 | 132522288 | C      | T | R2041* | SNV   | STOP_GAINED           | 1 | C>T    |
| EP40 0  | chr12 | 132512637 | C      | A | P1765T | SNV   | NON_SYNONYMOUS_CODING | 1 | C>A    |
| CSM D3  | chr8  | 114326810 | A      | T | F131I  | SNV   | NON_SYNONYMOUS_CODING | 1 | A>T    |
| CSM D3  | chr8  | 113304844 | C      | T | G2904R | SNV   | NON_SYNONYMOUS_CODING | 1 | C>T    |
| CSM D3  | chr8  | 113266510 | C      | G | G3361A | SNV   | NON_SYNONYMOUS_CODING | 1 | C>G    |
| CSM D3  | chr8  | 113348949 | AG     | A | -2317  | Indel | FRAME_SHIFT           | 1 | In del |
| CSM D3  | chr8  | 113702263 | AC TTT | A | -662   | Indel | FRAME_SHIFT           | 1 | In del |
| CSM D3  | chr8  | 113871376 | T      | G | K585Q  | SNV   | NON_SYNONYMOUS_CODING | 1 | T>G    |
| CSM D3  | chr8  | 113871409 | A      | G | C574R  | SNV   | NON_SYNONYMOUS_CODING | 2 | A>G    |
| CSM D3  | chr8  | 113308152 | G      | A | Q2842* | SNV   | STOP_GAINED           | 1 | G>A    |
| CSM D3  | chr8  | 113267612 | C      | T | E3303K | SNV   | NON_SYNONYMOUS_CODING | 1 | C>T    |
| COL3 A1 | chr2  | 189861915 | C      | T | R596*  | SNV   | STOP_GAINED           | 1 | C>T    |
| COL3 A1 | chr2  | 189854843 | C      | T | R238*  | SNV   | STOP_GAINED           | 1 | C>T    |
| COL3 A1 | chr2  | 189870103 | G      | A | G987S  | SNV   | NON_SYNONYMOUS_CODING | 1 | G>A    |

|         |       |           |               |     |            |       |                           |   |           |
|---------|-------|-----------|---------------|-----|------------|-------|---------------------------|---|-----------|
| CDK N2A | chr9  | 21971203  | AT<br>GA<br>C | A   | -106       | Indel | FRAME_SHIFT               | 1 | In<br>del |
| CDK N2A | chr9  | 21971111  | G             | A   | A138V      | SNV   | NON_SYNONYMOUS<br>_CODING | 2 | G><br>A   |
| CDK N2A | chr9  | 21971099  | G             | A   | P142L      | SNV   | NON_SYNONYMOUS<br>_CODING | 1 | G><br>A   |
| BRC A2  | chr13 | 32905055  | G             | T   |            | Indel | SPLICE_SITE_ACCEP<br>TOR  | 1 | In<br>del |
| BRC A2  | chr13 | 32929036  | T             | G   | F2349C     | SNV   | NON_SYNONYMOUS<br>_CODING | 1 | T><br>G   |
| BRC A2  | chr13 | 32912621  | A             | C   | N1377H     | SNV   | NON_SYNONYMOUS<br>_CODING | 1 | A><br>C   |
| BCO RL1 | chrX  | 129159070 | G             | A   | R1265H     | SNV   | NON_SYNONYMOUS<br>_CODING | 1 | G><br>A   |
| BCO RL1 | chrX  | 129155104 | C             | T   | R1196*     | SNV   | STOP_GAINED               | 1 | C><br>T   |
| BCO RL1 | chrX  | 129149383 | G             | T   | E879*      | SNV   | STOP_GAINED               | 1 | G><br>T   |
| BAP1    | chr3  | 52441413  | A             | T   |            | Indel | SPLICE_SITE_DONOR         | 1 | In<br>del |
| BAP1    | chr3  | 52441235  | G             | A   | R179W      | SNV   | NON_SYNONYMOUS<br>_CODING | 1 | G><br>A   |
| BAP1    | chr3  | 52440906  | C             | A   | E200*      | SNV   | STOP_GAINED               | 1 | C><br>A   |
| BAP1    | chr3  | 52439796  | C             | CAA | -305?      | Indel | FRAME_SHIFT               | 1 | In<br>del |
| BAI3    | chr6  | 70037710  | A             | C   |            | Indel | SPLICE_SITE_ACCEP<br>TOR  | 1 | In<br>del |
| BAI3    | chr6  | 70049284  | C             | T   | A1116V     | SNV   | NON_SYNONYMOUS<br>_CODING | 1 | C><br>T   |
| BAI3    | chr6  | 70071276  | G             | C   | E1371Q     | SNV   | NON_SYNONYMOUS<br>_CODING | 1 | G><br>C   |
| BAI3    | chr6  | 69348853  | G             | GA  | -96?       | Indel | FRAME_SHIFT               | 1 | In<br>del |
| ATR X   | chrX  | 76939697  | C             | A   | E351*      | SNV   | STOP_GAINED               | 1 | C><br>A   |
| ATR X   | chrX  | 76849277  | T             | C   | D2000G     | SNV   | NON_SYNONYMOUS<br>_CODING | 1 | T><br>C   |
| ATR X   | chrX  | 76972716  | T             | G   | S9R        | SNV   | NON_SYNONYMOUS<br>_CODING | 1 | T><br>G   |
| ATM     | chr11 | 108160464 | G             | A   | G1458R     | SNV   | NON_SYNONYMOUS<br>_CODING | 1 | G><br>A   |
| ATM     | chr11 | 108198387 | A             | T   | K2331*     | SNV   | STOP_GAINED               | 1 | A><br>T   |
| ATM     | chr11 | 108186766 | T             | C   | W2042<br>R | SNV   | NON_SYNONYMOUS<br>_CODING | 1 | T><br>C   |
| ATM     | chr11 | 108121684 | G             | T   | E498*      | SNV   | STOP_GAINED               | 1 | G><br>T   |
| ATM     | chr11 | 108216476 | C             | CA  | -2809?     | Indel | FRAME_SHIFT               | 1 | In<br>del |
| ARID    | chr12 | 46244611  | CT            | C   | -902       | Indel | FRAME_SHIFT               | 1 | In        |

|         |       |          |                                              |    |        |       |                       |   |        |
|---------|-------|----------|----------------------------------------------|----|--------|-------|-----------------------|---|--------|
| 2       |       |          |                                              |    |        |       |                       |   | del    |
| ARID 2  | chr12 | 46245865 | C                                            | A  | S1320* | SNV   | STOP_GAINED           | 1 | C>A    |
| ARID 2  | chr12 | 46231491 | G                                            | A  |        | Indel | SPLICE_SITE_DONOR     | 1 | In del |
| ARID 2  | chr12 | 46231104 | CT                                           | C  | -342   | Indel | FRAME_SHIFT           | 1 | In del |
| ARID 2  | chr12 | 46215255 | T                                            | TA | -231?  | Indel | FRAME_SHIFT           | 1 | In del |
| ARID 2  | chr12 | 46244803 | CT<br>AA<br>CA                               | C  | -966   | Indel | FRAME_SHIFT           | 1 | In del |
| ARID 1A | chr1  | 27105579 | T                                            | TC | -1731? | Indel | FRAME_SHIFT           | 1 | In del |
| ARID 1A | chr1  | 27101300 | C                                            | T  | R1528* | SNV   | STOP_GAINED           | 1 | C>T    |
| ARID 1A | chr1  | 27105930 | T                                            | TG | -1848? | Indel | FRAME_SHIFT           | 2 | In del |
| ARID 1A | chr1  | 27105736 | G                                            | T  | E1783* | SNV   | STOP_GAINED           | 1 | G>T    |
| ARID 1A | chr1  | 27106335 | CT<br>GT<br>G                                | C  | -1983  | Indel | FRAME_SHIFT           | 1 | In del |
| ARID 1A | chr1  | 27106549 | G                                            | T  | E2054* | SNV   | STOP_GAINED           | 1 | G>T    |
| ARID 1A | chr1  | 27057835 | C                                            | T  | Q515*  | SNV   | STOP_GAINED           | 2 | C>T    |
| ARID 1A | chr1  | 27057967 | CC<br>T                                      | C  | -559   | Indel | FRAME_SHIFT           | 1 | In del |
| ARID 1A | chr1  | 27099947 | C                                            | T  | R1276* | SNV   | STOP_GAINED           | 2 | C>T    |
| ARID 1A | chr1  | 27106803 | AC                                           | A  | -2139  | Indel | FRAME_SHIFT           | 2 | In del |
| ARID 1A | chr1  | 27106005 | AC                                           | A  | -1873  | Indel | FRAME_SHIFT           | 1 | In del |
| ARID 1A | chr1  | 27100284 | CT<br>CC<br>TA<br>TA<br>GA<br>CA<br>TG<br>AT | C  | -1335  | Indel | FRAME_SHIFT           | 1 | In del |
| ARID 1A | chr1  | 27056282 | CC<br>CG<br>CA<br>GC<br>G                    | C  | -427   | Indel | FRAME_SHIFT           | 1 | In del |
| ARID 1A | chr1  | 27056292 | T                                            | C  | Y430H  | SNV   | NON_SYNONYMOUS_CODING | 1 | T>C    |
| ARID 1A | chr1  | 27099878 | AA<br>CG<br>GC<br>GG<br>GA                   | A  | -1253  | Indel | FRAME_SHIFT           | 1 | In del |



|                  |       |           |          |     |            |       |                           |   |           |
|------------------|-------|-----------|----------|-----|------------|-------|---------------------------|---|-----------|
|                  |       |           | TG<br>GG |     |            |       |                           |   |           |
| ARID<br>1A       | chr1  | 27099023  | C        | A   | P1147T     | SNV   | NON_SYNONYMOUS<br>_CODING | 1 | C><br>A   |
| ARID<br>1A       | chr1  | 27056211  | C        | T   | Q403*      | SNV   | STOP_GAINED               | 1 | C><br>T   |
| APO<br>B         | chr2  | 21233296  | C        | CT  | -2148?     | Indel | FRAME_SHIFT               | 1 | In<br>del |
| APO<br>B         | chr2  | 21230961  | CT       | C   | -2926      | Indel | FRAME_SHIFT               | 1 | In<br>del |
| APO<br>B         | chr2  | 21238133  | C        | T   |            | Indel | SPLICE_SITE_ACCEP<br>TOR  | 1 | In<br>del |
| APO<br>B         | chr2  | 21246458  | A        | C   | I848R      | SNV   | NON_SYNONYMOUS<br>_CODING | 1 | A><br>C   |
| APC              | chr5  | 112175951 | G        | GA  | -1554?     | Indel | FRAME_SHIFT               | 1 | In<br>del |
| APC              | chr5  | 112175925 | CA       | C   | -1545      | Indel | FRAME_SHIFT               | 1 | In<br>del |
| APC              | chr5  | 112177529 | T        | A   | L2080<br>M | SNV   | NON_SYNONYMOUS<br>_CODING | 1 | T><br>A   |
| APC              | chr5  | 112154822 | A        | T   | K365*      | SNV   | STOP_GAINED               | 1 | A><br>T   |
| APC              | chr5  | 112175108 | A        | T   | R1273*     | SNV   | STOP_GAINED               | 1 | A><br>T   |
| APC              | chr5  | 112175879 | G        | T   | E1530*     | SNV   | STOP_GAINED               | 1 | G><br>T   |
| APC              | chr5  | 112175675 | A        | AAG | -1462?     | Indel | FRAME_SHIFT               | 1 | In<br>del |
| APC              | chr5  | 112177217 | G        | A   | D1976N     | SNV   | NON_SYNONYMOUS<br>_CODING | 1 | G><br>A   |
| APC              | chr5  | 112164670 | G        | T   |            | Indel | SPLICE_SITE_DONOR         | 1 | In<br>del |
| APC              | chr5  | 112175897 | G        | GA  | -1536?     | Indel | FRAME_SHIFT               | 1 | In<br>del |
| AKA<br>P9        | chr7  | 91714999  | A        | C   | E3012A     | SNV   | NON_SYNONYMOUS<br>_CODING | 1 | A><br>C   |
| AKA<br>P9        | chr7  | 91631813  | A        | G   | Y873C      | SNV   | NON_SYNONYMOUS<br>_CODING | 1 | A><br>G   |
| AKA<br>P9        | chr7  | 91691747  | T        | A   | L1987*     | SNV   | STOP_GAINED               | 1 | T><br>A   |
| ADA<br>MTS2<br>0 | chr12 | 43944731  | A        | C   | V145G      | SNV   | NON_SYNONYMOUS<br>_CODING | 1 | A><br>C   |
| ADA<br>MTS2<br>0 | chr12 | 43833726  | G        | C   | R813G      | SNV   | NON_SYNONYMOUS<br>_CODING | 1 | G><br>C   |
| ADA<br>MTS2<br>0 | chr12 | 43858516  | G        | T   | L463I      | SNV   | NON_SYNONYMOUS<br>_CODING | 1 | G><br>T   |
| ADA<br>MTS2<br>0 | chr12 | 43828120  | G        | A   | S883F      | SNV   | NON_SYNONYMOUS<br>_CODING | 1 | G><br>A   |

|          |       |           |                                  |    |        |       |                       |   |        |
|----------|-------|-----------|----------------------------------|----|--------|-------|-----------------------|---|--------|
| ADAMTS20 | chr12 | 43777734  | C                                | T  | C1500Y | SNV   | NON_SYNONYMOUS_CODING | 1 | C>T    |
| ADAMTS20 | chr12 | 43792997  | C                                | A  | V1442L | SNV   | NON_SYNONYMOUS_CODING | 1 | C>A    |
| ADAMTS20 | chr12 | 43840436  | C                                | T  | C720Y  | SNV   | NON_SYNONYMOUS_CODING | 1 | C>T    |
| ACVR2A   | chr2  | 148683685 | TA                               | T  | -435   | Indel | FRAME_SHIFT           | 3 | In del |
| ACVR2A   | chr2  | 148657040 | G                                | GA | -93?   | Indel | FRAME_SHIFT           | 1 | In del |
| ACVR2A   | chr2  | 148683685 | T                                | TA | -435?  | Indel | FRAME_SHIFT           | 2 | In del |
| ACVR1B   | chr12 | 52379131  | C                                | T  | R420*  | SNV   | STOP_GAINED           | 1 | C>T    |
| ACVR1B   | chr12 | 52379123  | G                                | A  | G417E  | SNV   | NON_SYNONYMOUS_CODING | 1 | G>A    |
| ACVR1B   | chr12 | 52369210  | CT<br>GA<br>GC<br>TC<br>GG<br>AG | C  | -85    | Indel | FRAME_SHIFT           | 1 | In del |
| ACVR1B   | chr12 | 52377825  | A                                | G  | H326R  | SNV   | NON_SYNONYMOUS_CODING | 1 | A>G    |

**Table S11. Information of TP53 mutations mapping.**

| Sample ID        | AA change | Type     | Chr   | Start Pos | End Pos | Ref                             | Var        |
|------------------|-----------|----------|-------|-----------|---------|---------------------------------|------------|
| <b>Thai HCC</b>  |           |          |       |           |         |                                 |            |
| LCS_501A         | E198*     | Nonsense | chr17 | 7578257   | 7578257 | C                               | A          |
| LCS_505A         | E258K     | Missense | chr17 | 7577509   | 7577509 | C                               | T          |
| LCS_528A         | R249M     | Missense | chr17 | 7577535   | 7577535 | C                               | A          |
| LCS_512A         | R249S     | Missense | chr17 | 7577534   | 7577534 | C                               | A          |
| LCS_508A         | R249S     | Missense | chr17 | 7577534   | 7577534 | C                               | A          |
| LCS_513A         | -178      | FS       | chr17 | 7578397   | 7578397 | TG                              | T          |
| LCS_541A         | C275Y     | Missense | chr17 | 7577114   | 7577114 | C                               | T          |
| LCS_542A         | -269      | FS       | chr17 | 7577132   | 7577132 | CT                              | C          |
| LCS_540A         | V218E     | Missense | chr17 | 7578196   | 7578196 | A                               | T          |
| LCS_538A         |           | Splice   | chr17 | 7577610   | 7577610 | T                               | A          |
| LCS_562A         | R273H     | Missense | chr17 | 7577120   | 7577120 | C                               | T          |
| LCS_524A         | K139E     | Missense | chr17 | 7578515   | 7578515 | T                               | C          |
| LCS_533A         | C135S     | Missense | chr17 | 7578526   | 7578526 | C                               | G          |
| LCS_568A         | G244V     | Missense | chr17 | 7577550   | 7577550 | C                               | A          |
| LCS_584A         | H193L     | Missense | chr17 | 7578271   | 7578271 | T                               | A          |
| LCS_530A         | R249S     | Missense | chr17 | 7577534   | 7577534 | C                               | A          |
| LCS_511A         | S241Y     | Missense | chr17 | 7577559   | 7577559 | G                               | T          |
| LCS_510A         | R249S     | Missense | chr17 | 7577534   | 7577534 | C                               | A          |
| LCS_559A         | F113V     | Missense | chr17 | 7579350   | 7579350 | A                               | C          |
| LCS_566A         | Y126H     | Missense | chr17 | 7578554   | 7578554 | A                               | G          |
| LCS_536A         | -53Q?     | FS       | chr17 | 7579528   | 7579528 | C                               | CCATT<br>G |
| LCS_532A         | -284?     | FS       | chr17 | 7577085   | 7577085 | C                               | CT         |
| LCS_563A         | K132M     | Missense | chr17 | 7578535   | 7578535 | T                               | A          |
| LCS_509A         | -260      | FS       | chr17 | 7577501   | 7577501 | GGA                             | G          |
| LCS_507A         | G244D     | Missense | chr17 | 7577550   | 7577550 | C                               | T          |
| LCS_519A         | R249S     | Missense | chr17 | 7577534   | 7577534 | C                               | A          |
| LCS_550A         | R249S     | Missense | chr17 | 7577534   | 7577534 | C                               | A          |
| <b>Thai iCCA</b> |           |          |       |           |         |                                 |            |
| LCS_612A         |           | Splice   | chr17 | 7590693   | 7590693 | A                               | T          |
| LCS_578A         | T253A     | Missense | chr17 | 7577524   | 7577524 | T                               | C          |
| LCS_618A         | R306*     | Nonsense | chr17 | 7577022   | 7577022 | G                               | A          |
| LCS_573A         | N239D     | Missense | chr17 | 7577566   | 7577566 | T                               | C          |
| LCS_681A         | G245S     | Missense | chr17 | 7577548   | 7577548 | C                               | T          |
| LCS_595A         | R175H     | Missense | chr17 | 7578406   | 7578406 | C                               | T          |
| LCS_626A         |           | Splice   | chr17 | 7590692   | 7590692 | T                               | TA         |
| LCS_624A         | V274F     | Missense | chr17 | 7577118   | 7577118 | C                               | A          |
| LCS_577A         | A276P     | Missense | chr17 | 7577112   | 7577112 | C                               | G          |
| LCS_680A         | -40       | FS       | chr17 | 7579554   | 7579554 | GCA<br>TCA<br>AAT<br>CAT<br>CCA | G          |
| LCS_649A         | L145Q     | Missense | chr17 | 7578496   | 7578496 | A                               | T          |
| LCS_623A         | A138P     | Missense | chr17 | 7578518   | 7578518 | C                               | G          |

|                 |         |          |       |         |         |    |               |
|-----------------|---------|----------|-------|---------|---------|----|---------------|
| LCS_580A        | L137Q   | Missense | chr17 | 7578520 | 7578520 | A  | T             |
| LCS_598A        | G245V   | Missense | chr17 | 7577547 | 7577547 | C  | A             |
| LCS_574A        | Q167*   | Nonsense | chr17 | 7578431 | 7578431 | G  | A             |
| LCS_685A        | -227?   | FS       | chr17 | 7577599 | 7577599 | C  | CA            |
| LCS_627A        | C275G   | Missense | chr17 | 7577115 | 7577115 | A  | C             |
| LCS_669A        | -294    | FS       | chr17 | 7577057 | 7577057 | TC | T             |
| LCS_645A        |         | Splice   | chr17 | 7578176 | 7578176 | C  | T             |
| LCS_644A        | R273H   | Missense | chr17 | 7577120 | 7577120 | C  | T             |
| LCS_687A        | R273H   | Missense | chr17 | 7577120 | 7577120 | C  | T             |
| LCS_688A        | V173L   | Missense | chr17 | 7578413 | 7578413 | C  | A             |
| LCS_572A        | R249S   | Missense | chr17 | 7577534 | 7577534 | C  | A             |
| LCS_571A        | -109TV? | FS       | chr17 | 7579359 | 7579359 | G  | GGAAA<br>CCGT |
| LCS_630A        | E326*   | Nonsense | chr17 | 7576870 | 7576870 | C  | A             |
| LCS_640A        | R282W   | Missense | chr17 | 7577094 | 7577094 | G  | A             |
| LCS_652A        | R213*   | Nonsense | chr17 | 7578212 | 7578212 | G  | A             |
| LCS_658A        | R248Q   | Missense | chr17 | 7577538 | 7577538 | C  | T             |
| LCS_600A        | R174W   | Missense | chr17 | 7578410 | 7578410 | T  | A             |
| LCS_616A        | V272M   | Missense | chr17 | 7577124 | 7577124 | C  | T             |
| LCS_646A        | R196*   | Nonsense | chr17 | 7578263 | 7578263 | G  | A             |
| LCS_631A        | R306*   | Nonsense | chr17 | 7577022 | 7577022 | G  | A             |
| LCS_610A        | -317    | FS       | chr17 | 7576896 | 7576896 | TG | T             |
| LCS_583A        | R248Q   | Missense | chr17 | 7577538 | 7577538 | C  | T             |
| LCS_583A        | H115R   | Missense | chr17 | 7579343 | 7579343 | T  | C             |
| LCS_670A        | G105V   | Missense | chr17 | 7579373 | 7579373 | C  | A             |
| LCS_604A        | -20     | FS       | chr17 | 7579854 | 7579854 | GA | G             |
| LCS_620A        | R337C   | Missense | chr17 | 7574018 | 7574018 | G  | A             |
| LCS_679A        | R196P   | Missense | chr17 | 7578262 | 7578262 | C  | G             |
| LCS_642A        | R175H   | Missense | chr17 | 7578406 | 7578406 | C  | T             |
| LCS_674A        | R280T   | Missense | chr17 | 7577099 | 7577099 | C  | G             |
| <b>TCGA HCC</b> |         |          |       |         |         |    |               |
| TCGA-UB-A7MC-01 | R248Q   | Missense | chr17 | 7577538 | 7577538 | C  | T             |
| TCGA-XR-A8TG-01 | R248Q   | Missense | chr17 | 7577538 | 7577538 | C  | T             |
| TCGA-WQ-AB4B-01 | R248Q   | Missense | chr17 | 7577538 | 7577538 | C  | T             |
| TCGA-ED-A459-01 | Y220C   | Missense | chr17 | 7578190 | 7578190 | T  | C             |
| TCGA-DD-AADD-01 | Y220C   | Missense | chr17 | 7578190 | 7578190 | T  | C             |
| TCGA-DD-AAAC-01 | C238R   | Missense | chr17 | 7577569 | 7577569 | A  | G             |
| TCGA-ZP-A9D2-01 | R280K   | Missense | chr17 | 7577099 | 7577099 | C  | T             |
| TCGA-BC-A10U-01 | R213Q   | Missense | chr17 | 7578211 | 7578211 | C  | T             |
| TCGA-BC-A216-01 | R248W   | Missense | chr17 | 7577539 | 7577539 | G  | A             |
| TCGA-DD-AAVU-01 | L194R   | Missense | chr17 | 7578268 | 7578268 | A  | C             |

|                 |       |          |       |         |         |   |   |
|-----------------|-------|----------|-------|---------|---------|---|---|
| TCGA-2Y-A9H8-01 | G245D | Missense | chr17 | 7577547 | 7577547 | C | T |
| TCGA-UB-A7MB-01 | Y205C | Missense | chr17 | 7578235 | 7578235 | T | C |
| TCGA-DD-AADL-01 | Y205C | Missense | chr17 | 7578235 | 7578235 | T | C |
| TCGA-FV-A4ZP-01 | E286K | Missense | chr17 | 7577082 | 7577082 | C | T |
| TCGA-BW-A5NO-01 | G266R | Missense | chr17 | 7577142 | 7577142 | C | T |
| TCGA-RG-A7D4-01 | C275Y | Missense | chr17 | 7577114 | 7577114 | C | T |
| TCGA-DD-A1EE-01 | H193R | Missense | chr17 | 7578271 | 7578271 | T | C |
| TCGA-G3-A25Z-01 | H193R | Missense | chr17 | 7578271 | 7578271 | T | C |
| TCGA-FV-A3I1-01 | H193R | Missense | chr17 | 7578271 | 7578271 | T | C |
| TCGA-MI-A75G-01 | H193R | Missense | chr17 | 7578271 | 7578271 | T | C |
| TCGA-UB-A7MF-01 | S215I | Missense | chr17 | 7578205 | 7578205 | C | A |
| TCGA-DD-A114-01 | R249S | Missense | chr17 | 7577534 | 7577534 | C | A |
| TCGA-G3-A25U-01 | R249S | Missense | chr17 | 7577534 | 7577534 | C | A |
| TCGA-CC-A3M9-01 | R249S | Missense | chr17 | 7577534 | 7577534 | C | A |
| TCGA-CC-A3MB-01 | R249S | Missense | chr17 | 7577534 | 7577534 | C | A |
| TCGA-CC-A5UE-01 | R249S | Missense | chr17 | 7577534 | 7577534 | C | A |
| TCGA-QA-A7B7-01 | R249S | Missense | chr17 | 7577534 | 7577534 | C | A |
| TCGA-CC-A7II-01 | R249S | Missense | chr17 | 7577534 | 7577534 | C | A |
| TCGA-ED-A7XP-01 | R249S | Missense | chr17 | 7577534 | 7577534 | C | A |
| TCGA-CC-A8HU-01 | R249S | Missense | chr17 | 7577534 | 7577534 | C | A |
| TCGA-CC-A8HV-01 | R249S | Missense | chr17 | 7577534 | 7577534 | C | A |
| TCGA-2Y-A9GS-01 | R249S | Missense | chr17 | 7577534 | 7577534 | C | A |
| TCGA-BC-A3KG-01 | N239S | Missense | chr17 | 7577565 | 7577565 | T | C |
| TCGA-2Y-A9GY-01 | R213L | Missense | chr17 | 7578211 | 7578211 | C | A |
| TCGA-FV-A4ZQ-01 | G266V | Missense | chr17 | 7577141 | 7577141 | C | A |
| TCGA-CC-A8HT-01 | M237I | Missense | chr17 | 7577570 | 7577570 | C | A |
| TCGA-BD-A3EP-01 | P151H | Missense | chr17 | 7578478 | 7578478 | G | T |
| TCGA-DD-        | C176W | Missense | chr17 | 7578402 | 7578402 | G | C |

|                 |                 |          |       |         |         |     |   |
|-----------------|-----------------|----------|-------|---------|---------|-----|---|
| AADW-01         |                 |          |       |         |         |     |   |
| TCGA-GJ-A3OU-01 | C275R           | Missense | chr17 | 7577115 | 7577115 | A   | G |
| TCGA-YA-A8S7-01 | Y205S           | Missense | chr17 | 7578235 | 7578235 | T   | G |
| TCGA-DD-AAEA-01 | I195S           | Missense | chr17 | 7578265 | 7578265 | A   | C |
| TCGA-G3-A7M6-01 | S215N           | Missense | chr17 | 7578205 | 7578205 | C   | T |
| TCGA-DD-AADB-01 | R273S           | Missense | chr17 | 7577121 | 7577121 | G   | T |
| TCGA-DD-AACB-01 | D281E           | Missense | chr17 | 7577095 | 7577095 | G   | C |
| TCGA-BC-A10R-01 | Q136*           | Nonsense | chr17 | 7578524 | 7578524 | G   | A |
| TCGA-G3-A25V-01 | I251Sfs*<br>94  | fs del   | chr17 | 7577531 | 7577531 | G   | - |
| TCGA-DD-AACU-01 | M246V           | Missense | chr17 | 7577545 | 7577545 | T   | C |
| TCGA-DD-AAD3-01 | E271V           | Missense | chr17 | 7577126 | 7577126 | T   | A |
| TCGA-RC-A7SK-01 | R174W           | Missense | chr17 | 7578410 | 7578410 | T   | A |
| TCGA-CC-5263-01 | C277*           | Nonsense | chr17 | 7577107 | 7577107 | A   | T |
| TCGA-2Y-A9HA-01 | M237Cfs<br>*10  | fs del   | chr17 | 7577572 | 7577572 | T   | - |
| TCGA-BC-A5W4-01 | A276G           | Missense | chr17 | 7577111 | 7577111 | G   | C |
| TCGA-DD-A3A7-01 | C135*           | Nonsense | chr17 | 7578525 | 7578525 | G   | T |
| TCGA-DD-AAD5-01 | F341V           | Missense | chr17 | 7574006 | 7574006 | A   | C |
| TCGA-G3-A5SJ-01 | K139N           | Missense | chr17 | 7578513 | 7578513 | C   | A |
| TCGA-DD-A39Y-01 | R158H           | Missense | chr17 | 7578457 | 7578457 | C   | T |
| TCGA-MI-A75I-01 | R158H           | Missense | chr17 | 7578457 | 7578457 | C   | T |
| TCGA-FV-A3R2-01 | R306*           | Nonsense | chr17 | 7577022 | 7577022 | G   | A |
| TCGA-4R-AA8I-01 | P191del         | if del   | chr17 | 7578275 | 7578277 | GAG | - |
| TCGA-T1-A6J8-01 | X187_spl<br>ice | Splice   | chr17 | 7578290 | 7578290 | C   | T |
| TCGA-CC-A5UD-01 | V157F           | Missense | chr17 | 7578461 | 7578461 | C   | A |
| TCGA-CC-A7IJ-01 | V157F           | Missense | chr17 | 7578461 | 7578461 | C   | A |
| TCGA-DD-AAVV-01 | V157F           | Missense | chr17 | 7578461 | 7578461 | C   | A |
| TCGA-BW-A5NQ-01 | Q192*           | Nonsense | chr17 | 7578275 | 7578275 | G   | A |
| TCGA-DD-        | Q192*           | Nonsense | chr17 | 7578275 | 7578275 | G   | A |

|                 |             |               |       |         |         |   |   |
|-----------------|-------------|---------------|-------|---------|---------|---|---|
| AACG-01         |             |               |       |         |         |   |   |
| TCGA-K7-AAU7-01 | R156P       | Missense      | chr17 | 7578463 | 7578463 | C | G |
| TCGA-WJ-A86L-01 | E204*       | Nonsense      | chr17 | 7578239 | 7578239 | C | A |
| TCGA-CC-A7IG-01 | E221*       | Nonsense      | chr17 | 7578188 | 7578188 | C | A |
| TCGA-CC-A3MA-01 | F113C       | Missense      | chr17 | 7579349 | 7579349 | A | C |
| TCGA-CC-A1HT-01 | X126_splice | Splice        | chr17 | 7578555 | 7578555 | C | T |
| TCGA-DD-AADC-01 | X126_splice | Splice        | chr17 | 7578555 | 7578555 | C | T |
| TCGA-DD-AAED-01 | X126_splice | Splice        | chr17 | 7578555 | 7578555 | C | T |
| TCGA-RC-A7SH-01 | V197L       | Missense      | chr17 | 7578260 | 7578260 | C | A |
| TCGA-DD-AADV-01 | S106R       | Missense      | chr17 | 7579369 | 7579369 | G | C |
| TCGA-DD-AACS-01 | Y126N       | Missense      | chr17 | 7578554 | 7578554 | A | T |
| TCGA-UB-A7MD-01 | X33_splice  | Splice        | chr17 | 7579591 | 7579591 | C | T |
| TCGA-DD-A1EB-01 | Y126D       | Missense      | chr17 | 7578554 | 7578554 | A | C |
| TCGA-DD-AAEC-01 | F328Sfs*17  | fs del        | chr17 | 7576863 | 7576863 | A | - |
| TCGA-DD-AACV-01 | Q144*       | Nonsense      | chr17 | 7578500 | 7578500 | G | A |
| TCGA-DD-A1EG-01 | V157G       | Missense      | chr17 | 7578460 | 7578460 | A | C |
| TCGA-G3-A3CJ-01 | V143M       | Missense      | chr17 | 7578503 | 7578503 | C | T |
| TCGA-RC-A6M6-01 | K292*       | Nonsense      | chr17 | 7577064 | 7577064 | T | A |
| TCGA-2Y-A9H4-01 | S90Pfs*33   | fs del        | chr17 | 7579420 | 7579420 | G | - |
| TCGA-5C-AAPD-01 | L43*        | fs del        | chr17 | 7579559 | 7579559 | A | - |
| TCGA-K7-A5RG-01 | X307_splice | Splice        | chr17 | 7576928 | 7576928 | T | C |
| TCGA-WX-AA44-01 | X307_splice | Splice        | chr17 | 7576928 | 7576928 | T | C |
| TCGA-G3-AAV4-01 | E224E       | splice_region | chr17 | 7578177 | 7578177 | C | T |
| TCGA-G3-A5SM-01 | X332_splice | Splice        | chr17 | 7574035 | 7574035 | T | C |
| TCGA-DD-A1EI-01 | E171*       | Nonsense      | chr17 | 7578419 | 7578419 | C | A |
| TCGA-DD-AAD8-01 | X225_splice | Splice        | chr17 | 7577610 | 7577610 | T | A |
| TCGA-RC-A7SB-01 | E258K       | Missense      | chr17 | 7577509 | 7577509 | C | T |
| TCGA-DD-A1EL-   | A161S       | Missense      | chr17 | 7578449 | 7578449 | C | A |

|                 |                  |          |       |         |         |                                                                          |            |
|-----------------|------------------|----------|-------|---------|---------|--------------------------------------------------------------------------|------------|
| 01              |                  |          |       |         |         |                                                                          |            |
| TCGA-DD-A11A-01 | V157_R1<br>58dup | if ins   | chr17 | 7578454 | 7578455 | NA                                                                       | CGCGG<br>A |
| TCGA-DD-AAE6-01 | V143Afs<br>*29   | fs ins   | chr17 | 7578502 | 7578503 | NA                                                                       | CAGGG      |
| TCGA-NI-A8LF-01 | A276Lfs<br>*31   | fs ins   | chr17 | 7577112 | 7577113 | NA                                                                       | ACAA       |
| TCGA-ED-A7XO-01 | L257P            | Missense | chr17 | 7577511 | 7577511 | A                                                                        | G          |
| TCGA-BC-A69H-01 | V97Efs*<br>48    | fs del   | chr17 | 7579389 | 7579399 | GGG<br>AAG<br>GGA<br>CA                                                  | -          |
| TCGA-BC-A8YO-01 | T230_T2<br>31del | if del   | chr17 | 7577589 | 7577594 | GTG<br>GTA                                                               | -          |
| TCGA-CC-5258-01 | N263Ifs*<br>82   | fs del   | chr17 | 7577150 | 7577150 | T                                                                        | -          |
| TCGA-CC-A7IK-01 | Q317Ffs<br>*9    | fs del   | chr17 | 7576866 | 7576897 | TAT<br>TCT<br>CCA<br>TCC<br>AGT<br>GGT<br>TTC<br>TTC<br>TTT<br>GGC<br>TG | -          |
| TCGA-DD-AACF-01 | V143Rfs<br>*18   | fs del   | chr17 | 7578477 | 7578504 | GGG<br>TGT<br>GGA<br>ATC<br>AAC<br>CCA<br>CAG<br>CTG<br>CAC<br>A         | -          |
| TCGA-DD-AACQ-01 | D228Vfs<br>*18   | fs del   | chr17 | 7577595 | 7577598 | CAG<br>T                                                                 | -          |
| TCGA-DD-AACZ-01 | N263Kfs<br>*9    | fs ins   | chr17 | 7577149 | 7577150 | -                                                                        | C          |
| TCGA-DD-AADN-01 | E204Vfs<br>*4    | fs del   | chr17 | 7578237 | 7578238 | CT                                                                       | -          |
| TCGA-DD-AAE0-01 | T253A            | Missense | chr17 | 7577524 | 7577524 | T                                                                        | C          |
| TCGA-DD-AAEI-01 | E56Kfs*<br>67    | fs del   | chr17 | 7579521 | 7579521 | C                                                                        | -          |
| TCGA-ED-A7PZ-01 | R248Hfs<br>*13   | fs del   | chr17 | 7577531 | 7577538 | GGG<br>CCT<br>CC                                                         | -          |
| TCGA-ES-A2HT-01 | S227P            | Missense | chr17 | 7577602 | 7577602 | A                                                                        | G          |
| TCGA-FV-A496-01 | Y103Tfs<br>*20   | fs del   | chr17 | 7579380 | 7579380 | A                                                                        | -          |



|                 |            |        |       |         |         |                 |   |
|-----------------|------------|--------|-------|---------|---------|-----------------|---|
| TCGA-G3-A7M9-01 | L194Efs*51 | fs del | chr17 | 7578264 | 7578270 | GAT<br>AAG<br>A | - |
| TCGA-G3-AAV7-01 | G262Vfs*83 | fs del | chr17 | 7577153 | 7577153 | C               | - |

**Table S12. Comparison table of TP53 mutation between HFGC and LFGC among PLC cohorts**

| Cohort              | Class | TP53<br>MUT | TP53<br>*DBD<br>MUT | TP53 WT | Fisher's exact test (p) |                   |
|---------------------|-------|-------------|---------------------|---------|-------------------------|-------------------|
|                     |       |             |                     |         | MUT vs. WT              | DBD MUT<br>vs. WT |
| TIGER_LC<br>(n=152) | HFGC  | 55          | 38                  | 46      | 2.85E-04                | 5.21E-04          |
|                     | LFGC  | 12          | 7                   | 39      |                         |                   |
| Thai_HCC<br>(n=62)  | HFGC  | 23          | 19                  | 25      | 0.24                    | 4.20E-02          |
|                     | LFGC  | 4           | 1                   | 10      |                         |                   |
| Thai_iCCA<br>(n=90) | HFGC  | 32          | 19                  | 21      | 4.78E-04                | 7.00E-03          |
|                     | LFGC  | 8           | 6                   | 29      |                         |                   |
| TCGA_HCC<br>(n=364) | HFGC  | 104         | 59                  | 192     | 3.14E-05                | 3.16E-03          |
|                     | LFGC  | 7           | 5                   | 61      |                         |                   |

\* DBD MUT : mutation occurred within DNA binding domain (DBD)

**Table S13a. Table for tFA of TCGA SKCM cohort**

| Sample ID                    | tFA      | Group | subset  |
|------------------------------|----------|-------|---------|
| TCGA-ER-A1A1-06A-11R-A18U-07 | 1833.533 | Low   | subset1 |
| TCGA-RP-A690-06A-11R-A311-07 | 1975.275 | NA    | subset1 |
| TCGA-EE-A2GU-06A-11R-A18T-07 | 1861.785 | Low   | subset1 |
| TCGA-EE-A3JE-06A-11R-A20F-07 | 1861.778 | Low   | subset1 |
| TCGA-BF-AAOX-01A-11R-A39D-07 | 2439.111 | High  | subset1 |
| TCGA-ER-A19P-06A-11R-A18S-07 | 2019.652 | NA    | subset1 |
| TCGA-D3-A2J6-06A-11R-A18T-07 | 2308.362 | NA    | subset1 |
| TCGA-D9-A6EG-06A-12R-A32P-07 | 1846.107 | Low   | subset1 |
| TCGA-WE-A8ZR-06A-11R-A37K-07 | 1766.808 | Low   | subset1 |
| TCGA-EB-A82C-01A-11R-A352-07 | 2376.790 | High  | subset1 |
| TCGA-FS-A1YY-06A-11R-A18T-07 | 2048.012 | NA    | subset1 |
| TCGA-ER-A19T-06A-11R-A18U-07 | 2747.214 | High  | subset1 |
| TCGA-D3-A51T-06A-11R-A266-07 | 2083.324 | NA    | subset1 |
| TCGA-EE-A3AF-06A-11R-A18S-07 | 2319.922 | NA    | subset1 |
| TCGA-QB-AA9O-06A-11R-A39D-07 | 2551.261 | High  | subset2 |
| TCGA-EE-A29R-06A-11R-A18T-07 | 2071.334 | NA    | subset1 |
| TCGA-D3-A2J9-06A-11R-A18T-07 | 1963.680 | NA    | subset1 |
| TCGA-FS-A4FC-06A-11R-A24X-07 | 1776.473 | Low   | subset1 |
| TCGA-D3-A3C8-06A-12R-A18S-07 | 2114.548 | NA    | subset1 |
| TCGA-EE-A2GJ-06A-11R-A18U-07 | 1769.805 | Low   | subset1 |
| TCGA-EB-A5UL-06A-11R-A311-07 | 2132.368 | NA    | subset1 |
| TCGA-D9-A1X3-06A-11R-A18S-07 | 1800.016 | Low   | subset1 |
| TCGA-Z2-AA3V-06A-11R-A39D-07 | 2945.241 | High  | subset1 |
| TCGA-BF-A5EP-01A-12R-A27Q-07 | 2282.277 | NA    | subset1 |
| TCGA-FS-A1Z4-06A-11R-A18T-07 | 1702.189 | Low   | subset1 |
| TCGA-EB-A5SG-06A-11R-A311-07 | 2307.041 | NA    | subset1 |
| TCGA-D3-A3ML-06A-11R-A21D-07 | 1974.338 | NA    | subset1 |
| TCGA-EE-A2M6-06A-12R-A18S-07 | 2023.653 | NA    | subset1 |
| TCGA-D3-A2JE-06A-11R-A37K-07 | 2037.189 | NA    | subset1 |
| TCGA-D3-A8GD-06A-11R-A37K-07 | 2183.112 | NA    | subset1 |
| TCGA-ER-A42K-06A-11R-A24X-07 | 2062.055 | NA    | subset1 |
| TCGA-EE-A2MQ-06A-11R-A18S-07 | 2026.100 | NA    | subset1 |
| TCGA-DA-A3F8-06A-11R-A20F-07 | 1998.634 | NA    | subset1 |
| TCGA-GN-A265-06A-21R-A18T-07 | 2176.448 | NA    | subset1 |
| TCGA-EE-A3AA-06A-11R-A18S-07 | 1735.311 | Low   | subset1 |
| TCGA-EE-A3J8-06A-11R-A20F-07 | 1711.218 | Low   | subset1 |
| TCGA-FR-A7U9-06A-11R-A352-07 | 2339.388 | High  | subset1 |
| TCGA-EB-A5SE-01A-11R-A311-07 | 2178.593 | NA    | subset1 |
| TCGA-DA-A1IC-06A-11R-A18S-07 | 2023.989 | NA    | subset1 |

|                              |          |      |         |
|------------------------------|----------|------|---------|
| TCGA-ER-A3EV-06A-11R-A20F-07 | 2619.586 | High | subset1 |
| TCGA-EB-A551-01A-21R-A27Q-07 | 1833.502 | Low  | subset1 |
| TCGA-EE-A2ME-06A-11R-A18T-07 | 1648.314 | Low  | subset1 |
| TCGA-EE-A29S-06A-11R-A18T-07 | 2153.671 | NA   | subset1 |
| TCGA-D3-A1QA-06A-11R-A18T-07 | 1841.090 | Low  | subset1 |
| TCGA-EE-A2A0-06A-11R-A18T-07 | 1616.215 | Low  | subset1 |
| TCGA-FW-A5DY-06A-11R-A311-07 | 1924.269 | NA   | subset1 |
| TCGA-D3-A5GS-06A-11R-A27Q-07 | 2074.785 | NA   | subset1 |
| TCGA-BF-A3DN-01A-11R-A20F-07 | 1723.537 | Low  | subset1 |
| TCGA-FS-A1Z7-06A-11R-A18T-07 | 1973.111 | NA   | subset1 |
| TCGA-EE-A29L-06A-12R-A18S-07 | 1920.932 | NA   | subset1 |
| TCGA-WE-A8ZM-06A-11R-A37K-07 | 2074.598 | NA   | subset1 |
| TCGA-BF-A5EO-01A-12R-A27Q-07 | 3161.755 | High | subset1 |
| TCGA-FS-A1ZU-06A-12R-A18T-07 | 2372.705 | High | subset1 |
| TCGA-WE-AA9Y-06A-12R-A38C-07 | 2221.827 | NA   | subset1 |
| TCGA-D3-A3CF-06A-11R-A18T-07 | 1960.643 | NA   | subset1 |
| TCGA-D3-A1Q1-06A-21R-A18T-07 | 2314.370 | NA   | subset1 |
| TCGA-D3-A3C3-06A-12R-A18S-07 | 2487.458 | High | subset1 |
| TCGA-D9-A3Z4-01A-11R-A239-07 | 2181.147 | NA   | subset1 |
| TCGA-ER-A2NF-01A-11R-A18T-07 | 2351.492 | High | subset1 |
| TCGA-FS-A1ZT-06A-11R-A18U-07 | 1802.765 | Low  | subset1 |
| TCGA-D3-A8GB-06A-11R-A37K-07 | 2413.124 | High | subset1 |
| TCGA-D3-A8GP-06A-11R-A37K-07 | 2128.930 | NA   | subset1 |
| TCGA-WE-A8ZY-06A-11R-A37K-07 | 2165.085 | NA   | subset1 |
| TCGA-FS-A1YX-06A-11R-A18T-07 | 1874.948 | Low  | subset1 |
| TCGA-EB-A3XB-01A-11R-A239-07 | 2013.839 | NA   | subset1 |
| TCGA-ER-A19S-06A-11R-A18U-07 | 2074.735 | NA   | subset1 |
| TCGA-EE-A2MR-06A-11R-A18S-07 | 1864.706 | Low  | subset1 |
| TCGA-D3-A8GE-06A-11R-A37K-07 | 1713.446 | Low  | subset1 |
| TCGA-FS-A1YW-06A-11R-A18T-07 | 1753.762 | Low  | subset1 |
| TCGA-GN-A4U5-01A-11R-A32P-07 | 2380.036 | High | subset1 |
| TCGA-HR-A2OH-06A-11R-A18U-07 | 2112.931 | NA   | subset1 |
| TCGA-D3-A8GS-06A-12R-A37K-07 | 2234.734 | NA   | subset1 |
| TCGA-D3-A8GN-06A-11R-A37K-07 | 2336.416 | High | subset1 |
| TCGA-EE-A2MP-06A-11R-A18S-07 | 2230.703 | NA   | subset1 |
| TCGA-EB-A5VU-01A-21R-A32P-07 | 1984.819 | NA   | subset1 |
| TCGA-EE-A2GN-06A-11R-A18S-07 | 2178.228 | NA   | subset1 |
| TCGA-GN-A8LN-01A-11R-A37K-07 | 1894.746 | Low  | subset2 |
| TCGA-FR-A8YE-06A-11R-A37K-07 | 1907.599 | Low  | subset1 |
| TCGA-EE-A185-06A-11R-A18S-07 | 2238.907 | NA   | subset1 |
| TCGA-ER-A195-06A-11R-A18U-07 | 1850.852 | Low  | subset1 |

|                              |          |      |         |
|------------------------------|----------|------|---------|
| TCGA-GF-A769-01A-32R-A32P-07 | 2011.733 | NA   | subset1 |
| TCGA-D3-A2JH-06A-11R-A18T-07 | 1969.564 | NA   | subset1 |
| TCGA-EE-A29V-06A-12R-A18S-07 | 2721.253 | High | subset1 |
| TCGA-EB-A5SH-06A-11R-A311-07 | 3147.432 | High | subset1 |
| TCGA-D3-A1QA-07A-11R-A37K-07 | 1887.884 | Low  | subset1 |
| TCGA-EB-A3HV-01A-11R-A21D-07 | 2765.014 | High | subset1 |
| TCGA-GF-A2C7-01A-11R-A18T-07 | 2015.868 | NA   | subset1 |
| TCGA-DA-A1I4-06A-11R-A18U-07 | 1947.043 | NA   | subset1 |
| TCGA-D3-A2JF-06A-11R-A18S-07 | 2355.263 | High | subset1 |
| TCGA-FR-A726-01A-11R-A32P-07 | 1931.381 | NA   | subset1 |
| TCGA-D3-A3BZ-06A-12R-A18S-07 | 2145.162 | NA   | subset1 |
| TCGA-DA-A1IB-06A-11R-A18S-07 | 1985.401 | NA   | subset1 |
| TCGA-GN-A266-06A-11R-A18T-07 | 1911.179 | Low  | subset1 |
| TCGA-EE-A2M8-06A-12R-A18S-07 | 1986.732 | NA   | subset1 |
| TCGA-EE-A2A6-06A-11R-A18T-07 | 1945.138 | NA   | subset1 |
| TCGA-ER-A2NF-06A-11R-A18T-07 | 2286.245 | NA   | subset1 |
| TCGA-ER-A3ET-06A-11R-A20F-07 | 1875.620 | Low  | subset1 |
| TCGA-FR-A3YN-06A-11R-A239-07 | 1987.026 | NA   | subset2 |
| TCGA-EE-A3AH-06A-11R-A18S-07 | 2073.417 | NA   | subset1 |
| TCGA-FR-A8YC-06A-11R-A37K-07 | 2146.297 | NA   | subset1 |
| TCGA-FS-A1Z3-06A-11R-A18T-07 | 1643.659 | Low  | subset1 |
| TCGA-D3-A2JP-06A-11R-A18S-07 | 2377.688 | High | subset1 |
| TCGA-RP-A695-06A-11R-A311-07 | 2045.651 | NA   | subset1 |
| TCGA-WE-A8ZX-06A-11R-A37K-07 | 2318.953 | NA   | subset1 |
| TCGA-DA-A95Y-06A-11R-A37K-07 | 2549.316 | High | subset1 |
| TCGA-ER-A19W-06A-41R-A239-07 | 1931.592 | NA   | subset1 |
| TCGA-FS-A1ZQ-06A-11R-A18U-07 | 2542.477 | High | subset1 |
| TCGA-D3-A51G-06A-11R-A266-07 | 1840.934 | Low  | subset1 |
| TCGA-GF-A4EO-06A-12R-A24X-07 | 1970.318 | NA   | subset1 |
| TCGA-D9-A1JW-06A-11R-A18S-07 | 2448.345 | High | subset1 |
| TCGA-EE-A20C-06A-11R-A18S-07 | 2139.490 | NA   | subset1 |
| TCGA-EE-A29X-06A-11R-A18T-07 | 2541.010 | High | subset1 |
| TCGA-EE-A2MM-06A-11R-A18S-07 | 2028.837 | NA   | subset1 |
| TCGA-EE-A3JB-06A-11R-A21D-07 | 1986.424 | NA   | subset1 |
| TCGA-EE-A2MK-06A-11R-A18S-07 | 2095.734 | NA   | subset1 |
| TCGA-DA-A1HW-06A-11R-A18U-07 | 1973.726 | NA   | subset1 |
| TCGA-FS-A1ZD-06A-11R-A18T-07 | 1624.258 | Low  | subset1 |
| TCGA-FS-A1ZP-06A-11R-A18T-07 | 1777.354 | Low  | subset1 |
| TCGA-D3-A2JL-06A-11R-A18S-07 | 2534.391 | High | subset1 |
| TCGA-BF-AAP2-01A-11R-A40A-07 | 2303.308 | NA   | subset1 |
| TCGA-D3-A2JB-06A-11R-A18T-07 | 2070.220 | NA   | subset1 |

|                              |          |      |         |
|------------------------------|----------|------|---------|
| TCGA-D3-A3CE-06A-11R-A18S-07 | 1758.624 | Low  | subset1 |
| TCGA-GF-A6C9-06A-11R-A311-07 | 2416.296 | High | subset1 |
| TCGA-ER-A19K-01A-21R-A18T-07 | 2027.554 | NA   | subset1 |
| TCGA-W3-AA1V-06B-11R-A40A-07 | 1847.777 | Low  | subset1 |
| TCGA-EB-A97M-01A-11R-A38C-07 | 2843.162 | High | subset1 |
| TCGA-EE-A29N-06A-12R-A18S-07 | 1758.215 | Low  | subset1 |
| TCGA-EB-A4OZ-01A-12R-A266-07 | 3544.320 | High | subset1 |
| TCGA-W3-AA21-06A-11R-A38C-07 | 2925.908 | High | subset1 |
| TCGA-ER-A19F-06A-11R-A18S-07 | 2015.959 | NA   | subset1 |
| TCGA-EE-A3AB-06A-11R-A18S-07 | 2371.241 | High | subset1 |
| TCGA-EB-A431-01A-11R-A266-07 | 1962.443 | NA   | subset1 |
| TCGA-XV-A9W2-01A-11R-A39D-07 | 2268.226 | NA   | subset1 |
| TCGA-BF-AAOU-01A-12R-A39D-07 | 2333.175 | High | subset1 |
| TCGA-EE-A2M5-06A-12R-A18S-07 | 1914.413 | NA   | subset1 |
| TCGA-YG-AA3O-06A-11R-A38C-07 | 1926.656 | NA   | subset1 |
| TCGA-D3-A8GJ-06A-11R-A37K-07 | 2290.560 | NA   | subset1 |
| TCGA-EB-A550-01A-61R-A27Q-07 | 2053.782 | NA   | subset1 |
| TCGA-FR-A729-06A-11R-A352-07 | 2166.960 | NA   | subset1 |
| TCGA-ER-A42H-01A-11R-A24X-07 | 2329.346 | High | subset1 |
| TCGA-DA-A1IA-06A-11R-A18S-07 | 3272.298 | High | subset1 |
| TCGA-EB-A42Y-01A-12R-A24X-07 | 2126.079 | NA   | subset1 |
| TCGA-LH-A9QB-06A-11R-A38C-07 | 1597.084 | Low  | subset1 |
| TCGA-BF-A1Q0-01A-21R-A18S-07 | 2191.620 | NA   | subset1 |
| TCGA-FS-A1ZB-06A-12R-A18S-07 | 2298.871 | NA   | subset1 |
| TCGA-D3-A51R-06A-11R-A266-07 | 1856.005 | Low  | subset1 |
| TCGA-FS-A1ZC-06A-11R-A18T-07 | 1928.130 | NA   | subset1 |
| TCGA-EB-A41B-01A-11R-A24X-07 | 2602.208 | High | subset1 |
| TCGA-DA-A1HV-06A-21R-A18S-07 | 2240.725 | NA   | subset1 |
| TCGA-FR-A44A-06A-11R-A24X-07 | 2060.373 | NA   | subset1 |
| TCGA-EE-A2GL-06A-11R-A18S-07 | 2030.395 | NA   | subset1 |
| TCGA-EE-A3J7-06A-11R-A20F-07 | 1923.413 | NA   | subset1 |
| TCGA-EB-A553-01A-12R-A27Q-07 | 2742.727 | High | subset1 |
| TCGA-D3-A1Q4-06A-11R-A18T-07 | 2087.720 | NA   | subset1 |
| TCGA-EE-A2MC-06A-12R-A18S-07 | 1912.422 | Low  | subset1 |
| TCGA-EE-A2MN-06A-11R-A18S-07 | 2253.975 | NA   | subset1 |
| TCGA-BF-A1PV-01A-11R-A18U-07 | 1816.889 | Low  | subset1 |
| TCGA-3N-A9WD-06A-11R-A38C-07 | 2125.827 | NA   | subset1 |
| TCGA-WE-A8ZN-06A-11R-A37K-07 | 3033.920 | High | subset1 |
| TCGA-BF-AAP7-01A-11R-A40A-07 | 2843.033 | High | subset1 |
| TCGA-EE-A2A1-06A-11R-A18T-07 | 2106.479 | NA   | subset1 |
| TCGA-EE-A3JA-06A-11R-A20F-07 | 1734.669 | Low  | subset1 |

|                              |          |      |         |
|------------------------------|----------|------|---------|
| TCGA-EE-A29C-06A-21R-A18S-07 | 2411.624 | High | subset2 |
| TCGA-D3-A3MO-06A-11R-A21D-07 | 1982.460 | NA   | subset1 |
| TCGA-ER-A19G-06A-11R-A18U-07 | 1930.281 | NA   | subset1 |
| TCGA-FS-A1ZA-06A-11R-A18T-07 | 2030.301 | NA   | subset1 |
| TCGA-EE-A181-06A-11R-A18S-07 | 1996.543 | NA   | subset1 |
| TCGA-EE-A2GB-06A-11R-A18T-07 | 1719.227 | Low  | subset1 |
| TCGA-EE-A2GI-06A-11R-A18T-07 | 2339.467 | High | subset1 |
| TCGA-D9-A6E9-06A-12R-A311-07 | 2542.533 | High | subset1 |
| TCGA-D3-A2JN-06A-11R-A18S-07 | 2213.550 | NA   | subset1 |
| TCGA-DA-A1I2-06A-21R-A18U-07 | 1859.553 | Low  | subset1 |
| TCGA-FW-A3R5-06A-11R-A239-07 | 1734.250 | Low  | subset1 |
| TCGA-BF-A5EQ-01A-21R-A27Q-07 | 2156.379 | NA   | subset1 |
| TCGA-EB-A3Y7-01A-11R-A239-07 | 2995.436 | High | subset1 |
| TCGA-WE-AAA3-06A-11R-A38C-07 | 2409.066 | High | subset1 |
| TCGA-BF-A3DM-01A-11R-A20F-07 | 1867.547 | Low  | subset1 |
| TCGA-GF-A6C8-06A-12R-A311-07 | 2117.417 | NA   | subset1 |
| TCGA-EB-A3Y6-01A-21R-A239-07 | 2084.139 | NA   | subset1 |
| TCGA-FS-A1ZS-06A-12R-A18T-07 | 1727.620 | Low  | subset1 |
| TCGA-EB-A5VV-06A-11R-A32P-07 | 2086.798 | NA   | subset1 |
| TCGA-FS-A1ZM-06A-12R-A18S-07 | 2005.679 | NA   | subset1 |
| TCGA-D3-A5GU-06A-11R-A27Q-07 | 2030.325 | NA   | subset1 |
| TCGA-GN-A267-06A-21R-A18T-07 | 2433.771 | High | subset1 |
| TCGA-XV-A9VZ-01A-11R-A38C-07 | 2080.786 | NA   | subset1 |
| TCGA-FW-A5DX-01A-11R-A27Q-07 | 1873.973 | Low  | subset1 |
| TCGA-YD-A9TA-06A-11R-A39D-07 | 1855.413 | Low  | subset1 |
| TCGA-GN-A262-06A-11R-A18T-07 | 2511.234 | High | subset1 |
| TCGA-WE-A8K6-06A-11R-A37K-07 | 2211.806 | NA   | subset1 |
| TCGA-D3-A3CC-06A-11R-A18S-07 | 1986.728 | NA   | subset1 |
| TCGA-FS-A4F5-06A-11R-A266-07 | 1949.295 | NA   | subset1 |
| TCGA-FS-A1ZK-06A-11R-A18T-07 | 1966.155 | NA   | subset1 |
| TCGA-EB-A85J-01A-12R-A352-07 | 2465.963 | High | subset1 |
| TCGA-EB-A6QZ-01A-12R-A32P-07 | 2285.247 | NA   | subset1 |
| TCGA-DA-A3F2-06A-11R-A20F-07 | 1916.093 | NA   | subset1 |
| TCGA-D9-A149-06A-11R-A18S-07 | 2179.247 | NA   | subset1 |
| TCGA-EE-A180-06A-11R-A21D-07 | 1962.510 | NA   | subset1 |
| TCGA-D9-A3Z3-06A-11R-A239-07 | 2329.837 | High | subset1 |
| TCGA-GN-A9SD-06A-11R-A40A-07 | 2121.817 | NA   | subset1 |
| TCGA-EE-A2MI-06A-11R-A18U-07 | 1770.823 | Low  | subset1 |
| TCGA-DA-A1I7-06A-22R-A18S-07 | 2155.671 | NA   | subset1 |
| TCGA-W3-AA1Q-06A-11R-A38C-07 | 2080.683 | NA   | subset1 |
| TCGA-BF-A9VF-01A-11R-A37K-07 | 2950.453 | High | subset1 |

|                              |          |      |         |
|------------------------------|----------|------|---------|
| TCGA-W3-AA1R-06A-11R-A39D-07 | 2231.668 | NA   | subset1 |
| TCGA-GN-A4U3-06A-11R-A32P-07 | 2117.681 | NA   | subset1 |
| TCGA-RP-A693-06A-13R-A311-07 | 1956.734 | NA   | subset1 |
| TCGA-D3-A5GO-06A-12R-A27Q-07 | 2364.763 | High | subset1 |
| TCGA-XV-AAZV-01A-11R-A40A-07 | 2662.743 | High | subset1 |
| TCGA-ER-A193-06A-12R-A18S-07 | 1985.362 | NA   | subset1 |
| TCGA-D3-A5GL-06A-11R-A27Q-07 | 2007.073 | NA   | subset1 |
| TCGA-D3-A3MU-06A-11R-A21D-07 | 2541.853 | High | subset1 |
| TCGA-EE-A29P-06A-11R-A18T-07 | 2028.607 | NA   | subset1 |
| TCGA-BF-AAP6-01A-11R-A40A-07 | 2012.012 | NA   | subset1 |
| TCGA-EB-A3XD-01A-22R-A239-07 | 2593.070 | High | subset1 |
| TCGA-XV-AAZY-01A-12R-A40A-07 | 3290.632 | High | subset1 |
| TCGA-EE-A2GE-06A-11R-A18T-07 | 2048.518 | NA   | subset1 |
| TCGA-EB-A5KH-06A-11R-A27Q-07 | 2802.093 | High | subset1 |
| TCGA-D3-A8GQ-06A-11R-A37K-07 | 2308.990 | NA   | subset1 |
| TCGA-D3-A8GL-06A-11R-A37K-07 | 1959.640 | NA   | subset1 |
| TCGA-GN-A268-06A-11R-A18T-07 | 1933.873 | NA   | subset1 |
| TCGA-FS-A1ZR-06A-21R-A18U-07 | 1835.580 | Low  | subset1 |
| TCGA-D3-A1Q6-06A-11R-A18T-07 | 1544.720 | Low  | subset1 |
| TCGA-EE-A3AC-06A-11R-A18S-07 | 1901.392 | Low  | subset1 |
| TCGA-EE-A29H-06A-12R-A18S-07 | 2223.850 | NA   | subset1 |
| TCGA-D3-A1Q3-06A-11R-A18T-07 | 1764.291 | Low  | subset1 |
| TCGA-GN-A26C-01A-11R-A18T-07 | 2226.242 | NA   | subset1 |
| TCGA-EE-A2GM-06B-11R-A18S-07 | 1931.751 | NA   | subset1 |
| TCGA-D3-A1Q8-06A-11R-A18T-07 | 2000.435 | NA   | subset1 |
| TCGA-BF-AAP0-06A-11R-A39D-07 | 2329.012 | NA   | subset1 |
| TCGA-EB-A3XE-01A-12R-A239-07 | 2935.296 | High | subset1 |
| TCGA-ER-A2NB-01A-12R-A18S-07 | 2398.038 | High | subset1 |
| TCGA-HR-A2OG-06A-21R-A18U-07 | 1885.062 | Low  | subset1 |
| TCGA-GN-A26A-06A-11R-A18T-07 | 2213.402 | NA   | subset1 |
| TCGA-D9-A4Z2-01A-11R-A24X-07 | 1956.883 | NA   | subset1 |
| TCGA-ER-A2NG-06A-11R-A18T-07 | 2086.277 | NA   | subset1 |
| TCGA-XV-AAZW-01A-12R-A40A-07 | 2405.637 | High | subset1 |
| TCGA-D3-A51N-06A-11R-A266-07 | 2375.036 | High | subset1 |
| TCGA-ER-A42L-06A-11R-A24X-07 | 1884.028 | Low  | subset1 |
| TCGA-W3-A828-06A-11R-A352-07 | 1728.455 | Low  | subset1 |
| TCGA-D3-A51H-06A-12R-A266-07 | 2163.153 | NA   | subset1 |
| TCGA-D3-A8GK-06A-11R-A37K-07 | 2323.482 | NA   | subset1 |
| TCGA-YD-A89C-06A-11R-A37K-07 | 2257.450 | NA   | subset1 |
| TCGA-EB-A3XF-01A-31R-A239-07 | 2003.544 | NA   | subset1 |
| TCGA-WE-A8K4-01A-12R-A37K-07 | 2094.691 | NA   | subset1 |



|                              |          |      |         |
|------------------------------|----------|------|---------|
| TCGA-EE-A29E-06A-11R-A18T-07 | 1956.071 | NA   | subset1 |
| TCGA-FS-A1ZJ-06A-12R-A18S-07 | 2172.719 | NA   | subset1 |
| TCGA-ER-A19A-06A-21R-A18U-07 | 1892.173 | Low  | subset1 |
| TCGA-DA-A1I0-06A-11R-A20F-07 | 3273.873 | High | subset1 |
| TCGA-EE-A182-06A-11R-A18T-07 | 3470.002 | High | subset1 |
| TCGA-DA-A95V-06A-11R-A37K-07 | 3114.335 | High | subset1 |
| TCGA-EE-A2MD-06A-11R-A18T-07 | 1836.676 | Low  | subset1 |
| TCGA-FS-A1ZZ-06A-11R-A18S-07 | 1858.423 | Low  | subset1 |
| TCGA-FS-A4F4-06A-12R-A266-07 | 2834.993 | High | subset1 |
| TCGA-GN-A263-01A-11R-A18T-07 | 1761.940 | Low  | subset1 |
| TCGA-RP-A694-06A-11R-A311-07 | 1899.378 | Low  | subset1 |
| TCGA-ER-A194-01A-11R-A18U-07 | 3309.356 | High | subset1 |
| TCGA-EE-A29B-06A-11R-A18U-07 | 2639.422 | High | subset1 |
| TCGA-GN-A4U7-06A-21R-A32P-07 | 2605.683 | High | subset1 |
| TCGA-EE-A3J3-06A-11R-A20F-07 | 2069.494 | NA   | subset1 |
| TCGA-D3-A3CB-06A-11R-A18S-07 | 1964.008 | NA   | subset1 |
| TCGA-FR-A2OS-01A-11R-A21D-07 | 1640.405 | Low  | subset1 |
| TCGA-GN-A264-06A-11R-A18U-07 | 1909.148 | Low  | subset1 |
| TCGA-EB-A85I-01A-11R-A352-07 | 2645.651 | High | subset1 |
| TCGA-D9-A148-06A-11R-A18S-07 | 2325.850 | NA   | subset1 |
| TCGA-ER-A19T-01A-11R-A18T-07 | 2445.725 | High | subset1 |
| TCGA-D3-A51F-06A-11R-A266-07 | 2176.655 | NA   | subset1 |
| TCGA-D9-A4Z6-06A-12R-A266-07 | 2008.184 | NA   | subset1 |
| TCGA-D3-A8GI-06A-11R-A37K-07 | 3280.004 | High | subset1 |
| TCGA-WE-A8ZQ-06A-41R-A37K-07 | 2016.299 | NA   | subset1 |
| TCGA-EE-A29A-06A-12R-A18U-07 | 1970.783 | NA   | subset1 |
| TCGA-GN-A4U4-06A-11R-A32P-07 | 1906.754 | Low  | subset2 |
| TCGA-EB-A41A-01A-11R-A24X-07 | 2100.956 | NA   | subset1 |
| TCGA-FW-A3TV-06A-11R-A239-07 | 1771.361 | Low  | subset1 |
| TCGA-BF-A5ES-01A-11R-A27Q-07 | 2474.821 | High | subset1 |
| TCGA-EB-A24D-01A-11R-A18T-07 | 2042.970 | NA   | subset1 |
| TCGA-D3-A1Q7-06A-11R-A18T-07 | 1796.908 | Low  | subset1 |
| TCGA-EE-A184-06A-11R-A18S-07 | 2126.913 | NA   | subset1 |
| TCGA-D3-A1Q5-06A-11R-A18T-07 | 1751.546 | Low  | subset1 |
| TCGA-D9-A4Z3-01A-11R-A266-07 | 2142.430 | NA   | subset1 |
| TCGA-FS-A4F2-06A-11R-A24X-07 | 2296.874 | NA   | subset1 |
| TCGA-ER-A2NH-06A-11R-A18S-07 | 2074.206 | NA   | subset1 |
| TCGA-D3-A8GR-06A-11R-A37K-07 | 2804.760 | High | subset1 |
| TCGA-W3-AA1O-06A-11R-A38C-07 | 1843.408 | Low  | subset1 |
| TCGA-WE-A8ZO-06A-11R-A37K-07 | 1859.589 | Low  | subset1 |
| TCGA-EE-A2GR-06A-11R-A18S-07 | 1757.063 | Low  | subset1 |

|                              |          |      |         |
|------------------------------|----------|------|---------|
| TCGA-ER-A190-06A-11R-A18S-07 | 2365.430 | High | subset1 |
| TCGA-D3-A3C7-06A-11R-A18U-07 | 2233.500 | NA   | subset1 |
| TCGA-EB-A82B-01A-11R-A352-07 | 2657.561 | High | subset1 |
| TCGA-EB-A6L9-06A-11R-A32P-07 | 2948.606 | High | subset1 |
| TCGA-DA-A1I8-06A-11R-A18T-07 | 2050.480 | NA   | subset1 |
| TCGA-ER-A2NC-06A-11R-A18T-07 | 2002.037 | NA   | subset1 |
| TCGA-EB-A3XC-01A-11R-A239-07 | 2406.407 | High | subset1 |
| TCGA-EE-A29G-06A-12R-A18T-07 | 1986.555 | NA   | subset1 |
| TCGA-BF-A3DL-01A-11R-A20F-07 | 2798.171 | High | subset1 |
| TCGA-EE-A2GD-06A-11R-A18T-07 | 1819.240 | Low  | subset1 |
| TCGA-EE-A2MU-06A-21R-A18S-07 | 2107.591 | NA   | subset1 |
| TCGA-EE-A2GT-06A-12R-A18S-07 | 2370.242 | High | subset1 |
| TCGA-ER-A19J-06A-11R-A18S-07 | 2056.954 | NA   | subset1 |
| TCGA-FS-A4F8-06A-11R-A266-07 | 1910.427 | Low  | subset1 |
| TCGA-EB-A44R-06A-41R-A266-07 | 2303.148 | NA   | subset1 |
| TCGA-EB-A4IQ-01A-12R-A266-07 | 2373.122 | High | subset1 |
| TCGA-Z2-A8RT-06A-11R-A37K-07 | 2126.651 | NA   | subset1 |
| TCGA-GN-A4U9-06A-11R-A32P-07 | 2266.429 | NA   | subset2 |
| TCGA-GN-A8LK-06A-11R-A37K-07 | 2929.237 | High | subset2 |
| TCGA-D3-A5GT-01A-12R-A311-07 | 2591.782 | High | subset1 |
| TCGA-D3-A2JG-06A-11R-A18T-07 | 2215.628 | NA   | subset1 |
| TCGA-YG-AA3N-01A-11R-A38C-07 | 2798.735 | High | subset1 |
| TCGA-EE-A2A2-06A-11R-A18T-07 | 1915.004 | NA   | subset1 |
| TCGA-EE-A29Q-06A-11R-A18T-07 | 1741.164 | Low  | subset1 |
| TCGA-EB-A51B-01A-11R-A27Q-07 | 2039.143 | NA   | subset1 |
| TCGA-Z2-AA3S-06A-11R-A39D-07 | 1943.714 | NA   | subset1 |
| TCGA-D3-A1Q9-06A-11R-A18T-07 | 1840.123 | Low  | subset1 |
| TCGA-FS-A1ZH-06A-11R-A18T-07 | 1976.220 | NA   | subset1 |
| TCGA-EB-A5UN-06A-11R-A311-07 | 1735.959 | Low  | subset1 |
| TCGA-D3-A51E-06A-11R-A266-07 | 2178.013 | NA   | subset1 |
| TCGA-D3-A8GM-06A-11R-A37K-07 | 1750.134 | Low  | subset1 |
| TCGA-D3-A8GO-06A-11R-A37K-07 | 2687.796 | High | subset1 |
| TCGA-WE-A8JZ-06A-11R-A37K-07 | 2113.723 | NA   | subset1 |
| TCGA-EE-A183-06A-11R-A18S-07 | 2910.901 | High | subset1 |
| TCGA-EE-A17Z-06A-11R-A18S-07 | 2333.957 | High | subset1 |
| TCGA-EE-A20F-06A-21R-A18S-07 | 2113.717 | NA   | subset1 |
| TCGA-EB-A44P-01A-11R-A266-07 | 1889.396 | Low  | subset1 |
| TCGA-DA-A95W-06A-11R-A37K-07 | 2365.247 | High | subset1 |
| TCGA-EB-A42Z-01A-12R-A24X-07 | 2199.235 | NA   | subset1 |
| TCGA-DA-A95Z-06A-11R-A37K-07 | 2345.368 | High | subset1 |
| TCGA-WE-A8K5-06A-11R-A37K-07 | 2233.435 | NA   | subset1 |

|                              |          |      |         |
|------------------------------|----------|------|---------|
| TCGA-ER-A197-06A-32R-A18S-07 | 2352.582 | High | subset1 |
| TCGA-FS-A1ZE-06A-11R-A18T-07 | 1833.423 | Low  | subset1 |
| TCGA-EB-A4XL-01A-11R-A27Q-07 | 1943.764 | NA   | subset1 |
| TCGA-XV-A9W5-01A-11R-A38C-07 | 2341.378 | High | subset1 |
| TCGA-EE-A3J4-06A-11R-A20F-07 | 2020.619 | NA   | subset1 |
| TCGA-WE-A8K1-06A-21R-A37K-07 | 2234.531 | NA   | subset1 |
| TCGA-EE-A2MJ-06A-11R-A18S-07 | 1899.382 | Low  | subset1 |
| TCGA-DA-A1I5-06A-11R-A18T-07 | 2159.440 | NA   | subset1 |
| TCGA-D3-A8GV-06A-11R-A37K-07 | 2415.200 | High | subset1 |
| TCGA-EB-A1NK-01A-11R-A18T-07 | 2610.533 | High | subset1 |
| TCGA-EE-A17Y-06A-11R-A18T-07 | 2010.815 | NA   | subset1 |
| TCGA-D3-A2J7-06A-11R-A18T-07 | 1852.938 | Low  | subset1 |
| TCGA-EE-A2GH-06A-11R-A18T-07 | 2353.014 | High | subset1 |
| TCGA-RP-A6K9-06A-41R-A352-07 | 2191.958 | NA   | subset1 |
| TCGA-EE-A2GS-06A-12R-A18S-07 | 2147.036 | NA   | subset2 |
| TCGA-EE-A2MH-06A-11R-A18S-07 | 2276.324 | NA   | subset1 |
| TCGA-EB-A430-01A-11R-A24X-07 | 2618.281 | High | subset1 |
| TCGA-EE-A3AG-06A-31R-A18S-07 | 2084.292 | NA   | subset1 |
| TCGA-D3-A51K-06A-11R-A266-07 | 3450.853 | High | subset1 |
| TCGA-EE-A17X-06A-11R-A18S-07 | 2312.433 | NA   | subset1 |
| TCGA-ER-A196-01A-11R-A18T-07 | 2102.420 | NA   | subset1 |
| TCGA-BF-A1PX-01A-12R-A18T-07 | 2431.812 | High | subset1 |
| TCGA-FR-A728-01A-11R-A32P-07 | 2239.871 | NA   | subset1 |
| TCGA-FR-A7U8-06A-21R-A352-07 | 2662.407 | High | subset1 |
| TCGA-EE-A3J5-06A-11R-A20F-07 | 2054.339 | NA   | subset1 |
| TCGA-HR-A5NC-01A-11R-A27Q-07 | 1966.957 | NA   | subset1 |
| TCGA-3N-A9WC-06A-11R-A38C-07 | 2032.608 | NA   | subset1 |
| TCGA-FS-A1ZN-01A-11R-A18T-07 | 1860.979 | Low  | subset1 |
| TCGA-EE-A29W-06A-11R-A18U-07 | 1871.479 | Low  | subset1 |
| TCGA-D9-A6EA-06A-11R-A311-07 | 2393.943 | High | subset1 |
| TCGA-W3-A824-06A-21R-A352-07 | 2300.339 | NA   | subset1 |
| TCGA-EE-A2MF-06A-11R-A21D-07 | 1771.066 | Low  | subset1 |
| TCGA-YG-AA3P-06A-11R-A38C-07 | 2343.788 | High | subset1 |
| TCGA-DA-A3F3-06A-11R-A20F-07 | 1871.956 | Low  | subset1 |
| TCGA-FR-A8YD-06A-11R-A37K-07 | 2969.640 | High | subset2 |
| TCGA-QB-A6FS-06A-11R-A311-07 | 3457.167 | High | subset1 |
| TCGA-FS-A1ZY-06A-11R-A18S-07 | 2479.247 | High | subset1 |
| TCGA-EB-A44Q-06A-11R-A266-07 | 1920.895 | NA   | subset1 |
| TCGA-WE-AAA0-06A-11R-A38C-07 | 2132.450 | NA   | subset2 |
| TCGA-D3-A2JD-06A-11R-A18T-07 | 2929.576 | High | subset1 |
| TCGA-FR-A3R1-01A-11R-A239-07 | 1710.592 | Low  | subset1 |

|                              |          |      |         |
|------------------------------|----------|------|---------|
| TCGA-BF-A3DJ-01A-11R-A20F-07 | 2116.079 | NA   | subset1 |
| TCGA-EE-A2GK-06A-11R-A18S-07 | 2087.017 | NA   | subset1 |
| TCGA-EE-A29M-06A-11R-A18T-07 | 1895.099 | Low  | subset1 |
| TCGA-FR-A3YO-06A-11R-A239-07 | 2886.871 | High | subset2 |
| TCGA-BF-A1PU-01A-11R-A18S-07 | 2413.662 | High | subset1 |
| TCGA-D3-A2JC-06A-11R-A18T-07 | 2294.340 | NA   | subset1 |
| TCGA-D3-A1QB-06A-11R-A18T-07 | 2234.045 | NA   | subset1 |
| TCGA-D3-A3C6-06A-12R-A18U-07 | 1970.091 | NA   | subset1 |
| TCGA-ER-A199-06A-11R-A18T-07 | 2123.379 | NA   | subset1 |
| TCGA-GN-A8LL-06A-21R-A37K-07 | 3005.469 | High | subset1 |
| TCGA-XV-AB01-06A-12R-A40A-07 | 3383.119 | High | subset1 |
| TCGA-EE-A2GP-06A-11R-A18S-07 | 1634.481 | Low  | subset1 |
| TCGA-EE-A2MG-06A-11R-A18T-07 | 1850.515 | Low  | subset1 |
| TCGA-BF-A5ER-01A-12R-A27Q-07 | 3188.303 | High | subset1 |
| TCGA-D3-A2J8-06A-11R-A18T-07 | 2195.415 | NA   | subset1 |
| TCGA-DA-A1HY-06A-11R-A18T-07 | 1835.734 | Low  | subset1 |
| TCGA-DA-A95X-06A-11R-A37K-07 | 1876.848 | Low  | subset1 |
| TCGA-D3-A3C1-06A-12R-A18S-07 | 2675.555 | High | subset1 |
| TCGA-EB-A24C-01A-11R-A18T-07 | 1955.662 | NA   | subset1 |
| TCGA-FS-A4F0-06A-11R-A24X-07 | 1692.776 | Low  | subset1 |
| TCGA-EE-A3JD-06A-11R-A20F-07 | 1698.645 | Low  | subset1 |
| TCGA-D9-A6EC-06A-11R-A311-07 | 2210.169 | NA   | subset1 |
| TCGA-EE-A2MS-06A-11R-A18S-07 | 2148.495 | NA   | subset1 |
| TCGA-FS-A4F9-06A-11R-A24X-07 | 1902.278 | Low  | subset1 |
| TCGA-BF-A1PZ-01A-11R-A18S-07 | 2393.962 | High | subset1 |
| TCGA-EE-A20H-06A-11R-A18S-07 | 1814.914 | Low  | subset1 |
| TCGA-FS-A4FD-06A-11R-A266-07 | 2136.244 | NA   | subset1 |
| TCGA-D3-A5GR-06A-11R-A27Q-07 | 1829.309 | Low  | subset1 |
| TCGA-EB-A57M-01A-51R-A311-07 | 2890.017 | High | subset1 |
| TCGA-EB-A299-01A-21R-A18U-07 | 2382.678 | High | subset1 |
| TCGA-EE-A20B-06A-11R-A18U-07 | 2121.893 | NA   | subset1 |
| TCGA-EE-A2A5-06A-11R-A18T-07 | 2049.528 | NA   | subset1 |
| TCGA-EB-A4IS-01A-21R-A266-07 | 2130.696 | NA   | subset1 |
| TCGA-D3-A3MV-06A-11R-A21D-07 | 1986.410 | NA   | subset1 |
| TCGA-EB-A6QY-01A-12R-A32P-07 | 1909.892 | Low  | subset1 |
| TCGA-DA-A1I1-06A-12R-A18U-07 | 1948.713 | NA   | subset1 |
| TCGA-ER-A19D-06A-11R-A18S-07 | 1773.560 | Low  | subset1 |
| TCGA-3N-A9WB-06A-11R-A38C-07 | 2184.664 | NA   | subset1 |
| TCGA-ER-A19B-06A-11R-A18S-07 | 2173.003 | NA   | subset1 |
| TCGA-D3-A3MR-06A-11R-A21D-07 | 2390.621 | High | subset1 |
| TCGA-FW-A3I3-06A-11R-A21D-07 | 1884.355 | Low  | subset1 |

|                              |          |      |         |
|------------------------------|----------|------|---------|
| TCGA-EE-A2GC-06A-11R-A18T-07 | 1644.236 | Low  | subset1 |
| TCGA-EB-A4OY-01A-11R-A266-07 | 3620.139 | High | subset1 |
| TCGA-ER-A3PL-06A-11R-A239-07 | 1991.540 | NA   | subset1 |
| TCGA-EE-A2M7-06A-11R-A18U-07 | 1919.662 | NA   | subset1 |
| TCGA-W3-A825-06A-11R-A352-07 | 2208.690 | NA   | subset1 |
| TCGA-EB-A44O-01A-11R-A266-07 | 1785.798 | Low  | subset1 |
| TCGA-D3-A8GC-06A-11R-A37K-07 | 1959.354 | NA   | subset1 |
| TCGA-EB-A44N-01A-11R-A266-07 | 1988.082 | NA   | subset1 |
| TCGA-DA-A960-01A-11R-A37K-07 | 3006.129 | High | subset1 |
| TCGA-FR-A7UA-06A-32R-A352-07 | 1883.542 | Low  | subset1 |
| TCGA-ER-A19Q-06A-11R-A18U-07 | 2150.867 | NA   | subset1 |
| TCGA-BF-AAP8-01A-11R-A40A-07 | 2284.551 | NA   | subset1 |
| TCGA-D9-A4Z5-01A-11R-A266-07 | 2118.556 | NA   | subset1 |
| TCGA-BF-AAP1-01A-11R-A39D-07 | 2271.943 | NA   | subset1 |
| TCGA-OD-A75X-06A-12R-A32P-07 | 1690.400 | Low  | subset1 |
| TCGA-EB-A6R0-01A-12R-A32P-07 | 1875.735 | Low  | subset1 |
| TCGA-ER-A198-06A-11R-A18T-07 | 1774.436 | Low  | subset1 |
| TCGA-WE-A8ZT-06A-11R-A37K-07 | 1534.970 | Low  | subset1 |
| TCGA-EE-A20I-06A-11R-A18U-07 | 2230.602 | NA   | subset1 |
| TCGA-FS-A1Z0-06A-11R-A18T-07 | 1778.477 | Low  | subset1 |
| TCGA-ER-A19L-06A-12R-A18S-07 | 1909.123 | Low  | subset1 |
| TCGA-FS-A1ZF-06A-12R-A18S-07 | 2206.751 | NA   | subset1 |
| TCGA-DA-A3F5-06A-11R-A20F-07 | 2173.165 | NA   | subset1 |
| TCGA-BF-AAP4-01A-11R-A40A-07 | 2253.955 | NA   | subset1 |
| TCGA-FR-A69P-06A-21R-A311-07 | 1825.268 | Low  | subset1 |
| TCGA-W3-AA1W-06A-11R-A38C-07 | 2113.790 | NA   | subset1 |
| TCGA-D3-A51J-06A-11R-A266-07 | 2105.771 | NA   | subset1 |
| TCGA-EB-A4P0-01A-41R-A266-07 | 2607.393 | High | subset1 |
| TCGA-D3-A5GN-06A-11R-A27Q-07 | 1867.903 | Low  | subset1 |
| TCGA-ER-A2NE-06A-21R-A18T-07 | 2045.589 | NA   | subset1 |
| TCGA-EE-A29T-06A-11R-A18T-07 | 1897.981 | Low  | subset1 |
| TCGA-EE-A2GO-06A-11R-A18S-07 | 2001.053 | NA   | subset1 |
| TCGA-EE-A3AD-06A-11R-A18S-07 | 1939.183 | NA   | subset1 |
| TCGA-D9-A1JX-06A-11R-A18S-07 | 2034.000 | NA   | subset1 |
| TCGA-EE-A3JH-06A-11R-A21D-07 | 1983.903 | NA   | subset1 |
| TCGA-EE-A3JI-06A-11R-A21D-07 | 1692.108 | Low  | subset2 |
| TCGA-EE-A29D-06A-11R-A18T-07 | 1953.450 | NA   | subset1 |
| TCGA-GN-A26D-06A-11R-A18T-07 | 2011.655 | NA   | subset1 |
| TCGA-GN-A4U8-06A-11R-A32P-07 | 2123.931 | NA   | subset1 |
| TCGA-ER-A19H-06A-12R-A18S-07 | 1714.553 | Low  | subset1 |
| TCGA-EE-A2ML-06A-11R-A18S-07 | 1785.597 | Low  | subset1 |

|                              |          |      |         |
|------------------------------|----------|------|---------|
| TCGA-ER-A3ES-06A-11R-A20F-07 | 1965.942 | NA   | subset1 |
| TCGA-IH-A3EA-01A-11R-A20F-07 | 3069.875 | High | subset1 |
| TCGA-FS-A1ZG-06A-11R-A18T-07 | 1905.587 | Low  | subset1 |
| TCGA-D9-A3Z1-06A-11R-A239-07 | 1895.923 | Low  | subset1 |
| TCGA-YD-A9TB-06A-12R-A40A-07 | 1846.249 | Low  | subset1 |
| TCGA-ER-A2ND-06A-11R-A18T-07 | 2667.364 | High | subset1 |
| TCGA-EB-A5SF-01A-11R-A311-07 | 2844.826 | High | subset1 |
| TCGA-D3-A2JK-06A-11R-A18S-07 | 2894.867 | High | subset1 |
| TCGA-FW-A3TU-06A-11R-A239-07 | 3110.687 | High | subset1 |
| TCGA-EB-A5FP-01A-11R-A27Q-07 | 1781.826 | Low  | subset1 |
| TCGA-ER-A19E-06A-11R-A18S-07 | 2002.127 | NA   | subset1 |
| TCGA-ER-A19M-06A-61R-A239-07 | 1969.996 | NA   | subset1 |
| TCGA-D3-A2JO-06A-11R-A18S-07 | 1919.488 | NA   | subset1 |
| TCGA-D3-A2JA-06A-11R-A18T-07 | 1929.326 | NA   | subset1 |
| TCGA-GF-A3OT-06A-23R-A239-07 | 1986.806 | NA   | subset2 |
| TCGA-ER-A19N-06A-11R-A18S-07 | 1962.540 | NA   | subset1 |
| TCGA-EE-A2MT-06A-11R-A18S-07 | 1947.686 | NA   | subset1 |
| TCGA-FS-A4FB-06A-11R-A266-07 | 1895.969 | Low  | subset1 |
| TCGA-GN-A4U8-11A-11R-A32P-07 | 2167.931 | NA   | subset1 |
| TCGA-EB-A5UM-01A-11R-A311-07 | 2956.515 | High | subset1 |
| TCGA-FS-A1ZW-06A-12R-A18T-07 | 1665.910 | Low  | subset1 |
| TCGA-WE-AAA4-06A-12R-A38C-07 | 2905.925 | High | subset1 |
| TCGA-ER-A19C-06A-11R-A18S-07 | 1911.208 | Low  | subset1 |

**Table S13b. Table for tFA of Hugo Melanoma cohort**

| <b>Sample ID</b> | <b>tFA</b> | <b>Group</b> |
|------------------|------------|--------------|
| Pt1              | 2232.637   | Low          |
| Pt2              | 2731.533   | High         |
| Pt4              | 2598.993   | Low          |
| Pt5              | 2313.247   | Low          |
| Pt6              | 2283.931   | Low          |
| Pt7              | 2854.153   | High         |
| Pt8              | 3014.902   | High         |
| Pt9              | 2445.262   | Low          |
| Pt10             | 2452.072   | Low          |
| Pt12             | 2362.878   | Low          |
| Pt13             | 2301.223   | Low          |
| Pt14             | 2384.946   | Low          |
| Pt15             | 3063.404   | High         |
| Pt16             | 3016.530   | High         |
| Pt19             | 3672.679   | High         |
| Pt20             | 2736.222   | High         |
| Pt22             | 2258.911   | Low          |
| Pt23             | 2706.164   | High         |
| Pt25             | 3924.079   | High         |
| Pt27A            | 2668.609   | Low          |
| Pt27B            | 2637.624   | Low          |
| Pt28             | 2037.138   | Low          |
| Pt29             | 2697.004   | High         |
| Pt31             | 3363.477   | High         |
| Pt32             | 2847.857   | High         |
| Pt35             | 2508.802   | Low          |
| Pt37             | 3509.842   | High         |
| Pt38             | 2764.535   | High         |
